# Supplementary material
Source: PubMed Central journal article supplement (PMC7836868)
Supplement: mmc1.pdf [file mmc1.pdf]

**Supplementary Table 1: Prediction of MHC-I Binding Peptides using IEDB-AR**

| S. No | Prediction of MHC I Binding epitopes |                  |       |     |        |             |                                        | Percentile Rank |
|-------|--------------------------------------|------------------|-------|-----|--------|-------------|----------------------------------------|-----------------|
|       | Allele                               | Protein          | Start | End | Length | Peptide     | Method                                 |                 |
| 1     | HLA-A*31:01                          | Envelope protein | 29    | 38  | 10     | VTLAILTALR  | Consensus (ann/smm)                    | 0.97            |
| 2     | HLA-A*33:03                          | Envelope protein | 51    | 61  | 11     | LVKPSFYVYSR | netmhcpa_el                            | 0.89            |
| 3     | HLA-A*02:01                          | Envelope protein | 16    | 25  | 10     | SVLLFLAFVV  | Consensus (ann/smm)                    | 0.87            |
| 4     | HLA-A*26:01                          | Envelope protein | 12    | 20  | 9      | LIVNSVLLF   | Consensus (ann/smm)                    | 0.86            |
| 5     | HLA-A*02:06                          | Envelope protein | 17    | 25  | 9      | VLLFLAFVV   | Consensus (ann/smm)                    | 0.84            |
| 6     | HLA-A*01:01                          | Envelope protein | 49    | 57  | 9      | VSLVKPSFY   | Consensus (ann/smm)                    | 0.83            |
| 7     | HLA-A*33:03                          | Envelope protein | 59    | 69  | 11     | YSRVKLNLSR  | netmhcpa_el                            | 0.83            |
| 8     | HLA-A*31:01                          | Envelope protein | 53    | 61  | 9      | KPSFYVYSR   | Consensus (ann/smm)                    | 0.82            |
| 9     | HLA-A*02:01                          | Envelope protein | 16    | 24  | 9      | SVLLFLAFV   | Consensus (ann/comblib_sidney2008/smm) | 0.8             |
| 10    | HLA-A*02:06                          | Envelope protein | 20    | 28  | 9      | FLAFVVFLL   | Consensus (ann/smm)                    | 0.53            |
| 11    | HLA-A*02:01                          | Envelope protein | 50    | 58  | 9      | SLVKPSFYV   | Consensus (ann/comblib_sidney2008/smm) | 0.5             |
| 12    | HLA-A*02:01                          | Envelope protein | 18    | 27  | 10     | LLFLAFVFL   | Consensus (ann/smm)                    | 0.48            |
| 13    | HLA-A*02:06                          | Envelope protein | 16    | 25  | 10     | SVLLFLAFVV  | Consensus (ann/smm)                    | 0.48            |
| 14    | HLA-A*02:06                          | Envelope protein | 20    | 29  | 10     | FLAFVVFLLV  | Consensus (ann/smm)                    | 0.47            |
| 15    | HLA-A*02:06                          | Envelope protein | 23    | 31  | 9      | FVVFLVTL    | Consensus (ann/smm)                    | 0.46            |
| 16    | HLA-A*33:03                          | Envelope protein | 29    | 38  | 10     | VTLAILTALR  | netmhcpa_el                            | 0.45            |
| 17    | HLA-A*33:03                          | Envelope protein | 60    | 69  | 10     | SRVKLNLSR   | netmhcpa_el                            | 0.45            |
| 18    | HLA-A*02:01                          | Envelope protein | 26    | 34  | 9      | FLLVTLAIL   | Consensus (ann/comblib_sidney2008/smm) | 0.43            |
| 19    | HLA-A*26:01                          | Envelope protein | 34    | 42  | 9      | LTALRLCAY   | Consensus (ann/smm)                    | 0.41            |
| 20    | HLA-A*02:06                          | Envelope protein | 50    | 58  | 9      | SLVKPSFYV   | Consensus (ann/smm)                    | 0.4             |
| 21    | HLA-A*02:01                          | Envelope protein | 19    | 29  | 11     | LFLAFVVFLLV | Consensus (ann/smm)                    | 0.39            |
| 22    | HLA-A*33:03                          | Envelope protein | 53    | 61  | 9      | KPSFYVYSR   | netmhcpa_el                            | 0.36            |
| 23    | HLA-A*02:06                          | Envelope protein | 16    | 24  | 9      | SVLLFLAFV   | Consensus (ann/smm)                    | 0.33            |
| 24    | HLA-A*02:01                          | Envelope protein | 17    | 25  | 9      | VLLFLAFVV   | Consensus (ann/comblib_sidney2008/smm) | 0.3             |
| 25    | HLA-A*02:01                          | Envelope protein | 20    | 28  | 9      | FLAFVVFLL   | Consensus (ann/comblib_sidney2008/smm) | 0.2             |

|    |             |                       |     |     |    |             |                                        |      |
|----|-------------|-----------------------|-----|-----|----|-------------|----------------------------------------|------|
| 26 | HLA-A*31:01 | Envelope protein      | 61  | 69  | 9  | RVKNLNSSR   | Consensus (ann/smm)                    | 0.16 |
| 27 | HLA-A*33:03 | Envelope protein      | 61  | 69  | 9  | RVKNLNSSR   | netmhcpa_el                            | 0.16 |
| 28 | HLA-A*02:01 | Envelope protein      | 20  | 29  | 10 | FLAFVVFLLV  | Consensus (ann/smm)                    | 0.15 |
| 29 | HLA-A*33:03 | Envelope protein      | 30  | 38  | 9  | TLAILTALR   | netmhcpa_el                            | 0.13 |
| 30 | HLA-A*01:01 | Envelope protein      | 34  | 42  | 9  | LTALRLCAY   | Consensus (ann/smm)                    | 0.12 |
| 31 | HLA-A*02:01 | Membrane glycoprotein | 108 | 116 | 9  | SMWSFNPET   | Consensus (ann/comblib_sidney2008/smm) | 1    |
| 32 | HLA-A*33:03 | Membrane glycoprotein | 95  | 105 | 11 | YFIASFRLFAR | netmhcpa_el                            | 1    |
| 33 | HLA-A*03:01 | Membrane glycoprotein | 92  | 101 | 10 | WLSYFIASFR  | Consensus (ann/smm)                    | 0.99 |
| 34 | HLA-A*33:03 | Membrane glycoprotein | 149 | 158 | 10 | LRIAGHHLGR  | netmhcpa_el                            | 0.99 |
| 35 | HLA-A*31:01 | Membrane glycoprotein | 99  | 107 | 9  | SFRLFARTR   | Consensus (ann/smm)                    | 0.97 |
| 36 | HLA-A*02:01 | Membrane glycoprotein | 53  | 60  | 8  | FLWLLWPV    | Consensus (ann/smm)                    | 0.96 |
| 37 | HLA-A*26:01 | Membrane glycoprotein | 190 | 199 | 10 | DSGFAAYSRY  | Consensus (ann/smm)                    | 0.95 |
| 38 | HLA-A*33:03 | Membrane glycoprotein | 123 | 131 | 9  | PLHGTILTR   | netmhcpa_el                            | 0.95 |
| 39 | HLA-A*31:01 | Membrane glycoprotein | 172 | 180 | 9  | TSRTLSEYK   | Consensus (ann/smm)                    | 0.94 |
| 40 | HLA-A*02:01 | Membrane glycoprotein | 15  | 24  | 10 | KLLEQWNLVI  | Consensus (ann/smm)                    | 0.91 |
| 41 | HLA-A*33:03 | Membrane glycoprotein | 37  | 44  | 8  | FAYANRNR    | netmhcpa_el                            | 0.88 |
| 42 | HLA-A*02:01 | Membrane glycoprotein | 52  | 60  | 9  | IFLWLLWPV   | Consensus (ann/comblib_sidney2008/smm) | 0.86 |
| 43 | HLA-A*33:03 | Membrane glycoprotein | 63  | 72  | 10 | ACFVLAAYR   | netmhcpa_el                            | 0.81 |
| 44 | HLA-A*02:01 | Membrane glycoprotein | 53  | 61  | 9  | FLWLLWPVT   | Consensus (ann/comblib_sidney2008/smm) | 0.8  |
| 45 | HLA-A*02:06 | Membrane glycoprotein | 50  | 60  | 11 | KLIFLWLLWPV | Consensus (ann/smm)                    | 0.8  |
| 46 | HLA-A*11:01 | Membrane glycoprotein | 93  | 101 | 9  | LSYFIASFR   | Consensus (ann/smm)                    | 0.78 |
| 47 | HLA-A*24:02 | Membrane glycoprotein | 50  | 58  | 9  | KLIFLWLLW   | Consensus (ann/smm)                    | 0.78 |
| 48 | HLA-A*24:02 | Membrane glycoprotein | 198 | 206 | 9  | RYRIGNYKL   | Consensus (ann/smm)                    | 0.77 |
| 49 | HLA-A*33:03 | Membrane glycoprotein | 193 | 200 | 8  | FAAYSRYR    | netmhcpa_el                            | 0.77 |
| 50 | HLA-A*33:03 | Membrane glycoprotein | 121 | 131 | 11 | NVPLHGTILTR | netmhcpa_el                            | 0.77 |
| 51 | HLA-A*33:03 | Membrane glycoprotein | 136 | 146 | 11 | SELVIGAVILR | netmhcpa_el                            | 0.77 |
| 52 | HLA-A*31:01 | Membrane glycoprotein | 94  | 101 | 8  | SYFIASFR    | ann                                    | 0.76 |
| 53 | HLA-A*33:03 | Membrane glycoprotein | 141 | 150 | 10 | GAVILRGHLR  | netmhcpa_el                            | 0.76 |
| 54 | HLA-A*01:01 | Membrane glycoprotein | 188 | 196 | 9  | AGDSGFAAY   | Consensus (ann/smm)                    | 0.75 |

|    |             |                       |     |     |    |             |                                        |      |
|----|-------------|-----------------------|-----|-----|----|-------------|----------------------------------------|------|
| 55 | HLA-A*31:01 | Membrane glycoprotein | 177 | 186 | 10 | SYKLGASQR   | Consensus (ann/smm)                    | 0.74 |
| 56 | HLA-A*26:01 | Membrane glycoprotein | 95  | 103 | 9  | YFIASFRLF   | Consensus (ann/smm)                    | 0.73 |
| 57 | HLA-A*02:01 | Membrane glycoprotein | 90  | 98  | 9  | LMWLSYFIA   | Consensus (ann/comblib_sidney2008/smm) | 0.7  |
| 58 | HLA-A*11:01 | Membrane glycoprotein | 4   | 14  | 11 | SNGTITVEELK | Consensus (ann/smm)                    | 0.7  |
| 59 | HLA-A*24:02 | Membrane glycoprotein | 102 | 112 | 11 | LFARTRSMWSF | Consensus (ann/smm)                    | 0.7  |
| 60 | HLA-A*24:02 | Membrane glycoprotein | 44  | 52  | 9  | RFLYIIKLI   | Consensus (ann/smm)                    | 0.7  |
| 61 | HLA-A*11:01 | Membrane glycoprotein | 171 | 179 | 9  | ATSRTLSYY   | Consensus (ann/smm)                    | 0.69 |
| 62 | HLA-A*02:06 | Membrane glycoprotein | 89  | 97  | 9  | GLMWLSYFI   | Consensus (ann/smm)                    | 0.68 |
| 63 | HLA-A*24:02 | Membrane glycoprotein | 47  | 55  | 9  | YIIKLIFLW   | Consensus (ann/smm)                    | 0.67 |
| 64 | HLA-A*26:01 | Membrane glycoprotein | 86  | 95  | 10 | CLVGLMWLSY  | Consensus (ann/smm)                    | 0.67 |
| 65 | HLA-A*01:01 | Membrane glycoprotein | 87  | 95  | 9  | LVGLMWLSY   | Consensus (ann/smm)                    | 0.65 |
| 66 | HLA-A*33:03 | Membrane glycoprotein | 172 | 180 | 9  | TSRTLSYYK   | netmhcpa_el                            | 0.64 |
| 67 | HLA-A*33:03 | Membrane glycoprotein | 35  | 44  | 10 | LQFAYANRRR  | netmhcpa_el                            | 0.64 |
| 68 | HLA-A*03:01 | Membrane glycoprotein | 172 | 180 | 9  | TSRTLSYYK   | Consensus (ann/smm)                    | 0.63 |
| 69 | HLA-A*03:01 | Membrane glycoprotein | 150 | 158 | 9  | RIAGHHLGR   | Consensus (ann/smm)                    | 0.61 |
| 70 | HLA-A*24:02 | Membrane glycoprotein | 90  | 100 | 11 | LMWLSYFIASF | Consensus (ann/smm)                    | 0.57 |
| 71 | HLA-A*01:01 | Membrane glycoprotein | 169 | 178 | 10 | TVATSRTLSY  | Consensus (ann/smm)                    | 0.56 |
| 72 | HLA-A*02:01 | Membrane glycoprotein | 89  | 98  | 10 | GLMWLSYFIA  | Consensus (ann/smm)                    | 0.53 |
| 73 | HLA-A*02:06 | Membrane glycoprotein | 61  | 70  | 10 | TLACFVLA AV | Consensus (ann/smm)                    | 0.53 |
| 74 | HLA-A*33:03 | Membrane glycoprotein | 65  | 72  | 8  | FVLA AVYR   | netmhcpa_el                            | 0.5  |
| 75 | HLA-A*03:01 | Membrane glycoprotein | 93  | 101 | 9  | LSYFIASFR   | Consensus (ann/smm)                    | 0.48 |
| 76 | HLA-A*33:03 | Membrane glycoprotein | 96  | 105 | 10 | FIASFRLFAR  | netmhcpa_el                            | 0.48 |
| 77 | HLA-A*03:01 | Membrane glycoprotein | 196 | 205 | 10 | YSRYRIGNYK  | Consensus (ann/smm)                    | 0.47 |
| 78 | HLA-A*31:01 | Membrane glycoprotein | 150 | 158 | 9  | RIAGHHLGR   | Consensus (ann/smm)                    | 0.46 |
| 79 | HLA-A*24:02 | Membrane glycoprotein | 44  | 53  | 10 | RFLYIIKLIF  | Consensus (ann/smm)                    | 0.45 |
| 80 | HLA-A*02:06 | Membrane glycoprotein | 65  | 73  | 9  | FVLA AVYRI  | Consensus (ann/smm)                    | 0.44 |
| 81 | HLA-A*24:02 | Membrane glycoprotein | 54  | 62  | 9  | LWLLWPVTL   | Consensus (ann/smm)                    | 0.43 |
| 82 | HLA-A*31:01 | Membrane glycoprotein | 142 | 150 | 9  | AVILRGHLR   | Consensus (ann/smm)                    | 0.43 |
| 83 | HLA-A*31:01 | Membrane glycoprotein | 192 | 200 | 9  | GFAAYSRYR   | Consensus (ann/smm)                    | 0.41 |

|     |             |                       |     |     |    |             |                                        |      |
|-----|-------------|-----------------------|-----|-----|----|-------------|----------------------------------------|------|
| 84  | HLA-A*02:01 | Membrane glycoprotein | 15  | 23  | 9  | KLLEQWNLV   | Consensus (ann/comblib_sidney2008/smm) | 0.4  |
| 85  | HLA-A*02:01 | Membrane glycoprotein | 26  | 34  | 9  | FLFLTWICL   | Consensus (ann/comblib_sidney2008/smm) | 0.4  |
| 86  | HLA-A*02:01 | Membrane glycoprotein | 65  | 73  | 9  | FVLAADVRI   | Consensus (ann/comblib_sidney2008/smm) | 0.4  |
| 87  | HLA-A*26:01 | Membrane glycoprotein | 196 | 204 | 9  | YSRYRIGNY   | Consensus (ann/smm)                    | 0.4  |
| 88  | HLA-A*31:01 | Membrane glycoprotein | 92  | 101 | 10 | WLSYFIASFR  | Consensus (ann/smm)                    | 0.4  |
| 89  | HLA-A*01:01 | Membrane glycoprotein | 31  | 39  | 9  | WICLLQFAY   | Consensus (ann/smm)                    | 0.37 |
| 90  | HLA-A*11:01 | Membrane glycoprotein | 6   | 14  | 9  | GTITVEELK   | Consensus (ann/smm)                    | 0.36 |
| 91  | HLA-A*02:01 | Membrane glycoprotein | 56  | 66  | 11 | LLWPVTLACFV | Consensus (ann/smm)                    | 0.35 |
| 92  | HLA-A*11:01 | Membrane glycoprotein | 172 | 180 | 9  | TSRTLSSYYK  | Consensus (ann/smm)                    | 0.35 |
| 93  | HLA-A*31:01 | Membrane glycoprotein | 191 | 200 | 10 | SGFAAYSRYR  | Consensus (ann/smm)                    | 0.35 |
| 94  | HLA-A*33:03 | Membrane glycoprotein | 190 | 198 | 9  | DSGFAAYSRS  | netmhcpa_el                            | 0.35 |
| 95  | HLA-A*33:03 | Membrane glycoprotein | 64  | 72  | 9  | CFVLAADVRS  | netmhcpa_el                            | 0.33 |
| 96  | HLA-A*33:03 | Membrane glycoprotein | 191 | 200 | 10 | SGFAAYSRYR  | netmhcpa_el                            | 0.32 |
| 97  | HLA-A*33:03 | Membrane glycoprotein | 34  | 42  | 9  | LLQFAYANR   | netmhcpa_el                            | 0.31 |
| 98  | HLA-A*31:01 | Membrane glycoprotein | 96  | 105 | 10 | FIASFRIFAR  | Consensus (ann/smm)                    | 0.3  |
| 99  | HLA-A*02:01 | Membrane glycoprotein | 45  | 54  | 10 | FLYIKLIFL   | Consensus (ann/smm)                    | 0.29 |
| 100 | HLA-A*31:01 | Membrane glycoprotein | 97  | 105 | 9  | IASFRIFAR   | Consensus (ann/smm)                    | 0.29 |
| 101 | HLA-A*33:03 | Membrane glycoprotein | 94  | 101 | 8  | SYFIASFR    | netmhcpa_el                            | 0.29 |
| 102 | HLA-A*01:01 | Membrane glycoprotein | 39  | 47  | 9  | YANRNRFLY   | Consensus (ann/smm)                    | 0.28 |
| 103 | HLA-A*01:01 | Membrane glycoprotein | 170 | 179 | 10 | VATSRTLSSYY | Consensus (ann/smm)                    | 0.28 |
| 104 | HLA-A*02:01 | Membrane glycoprotein | 53  | 62  | 10 | FLWLLWPVTL  | Consensus (ann/smm)                    | 0.28 |
| 105 | HLA-A*02:06 | Membrane glycoprotein | 52  | 60  | 9  | IFLWLLWPV   | Consensus (ann/smm)                    | 0.28 |
| 106 | HLA-A*11:01 | Membrane glycoprotein | 6   | 15  | 10 | GTITVEELKK  | Consensus (ann/smm)                    | 0.27 |
| 107 | HLA-A*31:01 | Membrane glycoprotein | 98  | 107 | 10 | ASFRLFARTR  | Consensus (ann/smm)                    | 0.27 |
| 108 | HLA-A*31:01 | Membrane glycoprotein | 98  | 105 | 8  | ASFRLFAR    | ann                                    | 0.27 |
| 109 | HLA-A*26:01 | Membrane glycoprotein | 171 | 179 | 9  | ATSRTLSSYY  | Consensus (ann/smm)                    | 0.26 |
| 110 | HLA-A*24:02 | Membrane glycoprotein | 46  | 55  | 10 | LYIKLIFLW   | Consensus (ann/smm)                    | 0.23 |
| 111 | HLA-A*33:03 | Membrane glycoprotein | 192 | 200 | 9  | GFAAYSRYR   | netmhcpa_el                            | 0.23 |
| 112 | HLA-A*33:03 | Membrane glycoprotein | 137 | 146 | 10 | ELVIGAVILR  | netmhcpa_el                            | 0.23 |

|     |             |                       |     |     |    |              |                                        |      |
|-----|-------------|-----------------------|-----|-----|----|--------------|----------------------------------------|------|
| 113 | HLA-A*24:02 | Membrane glycoprotein | 94  | 102 | 9  | SYFIASFRL    | Consensus (ann/smm)                    | 0.22 |
| 114 | HLA-A*26:01 | Membrane glycoprotein | 169 | 178 | 10 | TVATSRTLSTY  | Consensus (ann/smm)                    | 0.22 |
| 115 | HLA-A*33:03 | Membrane glycoprotein | 177 | 186 | 10 | SYKLGASQR    | netmhcpa_el                            | 0.22 |
| 116 | HLA-A*02:01 | Membrane glycoprotein | 61  | 70  | 10 | TLACFVLAAV   | Consensus (ann/smm)                    | 0.21 |
| 117 | HLA-A*01:01 | Membrane glycoprotein | 213 | 221 | 9  | SSDNIALLV    | Consensus (ann/smm)                    | 0.2  |
| 118 | HLA-A*02:01 | Membrane glycoprotein | 89  | 97  | 9  | GLMWLSYFI    | Consensus (ann/comblib_sidney2008/smm) | 0.2  |
| 119 | HLA-A*24:02 | Membrane glycoprotein | 57  | 65  | 9  | LWPVTLACF    | Consensus (ann/smm)                    | 0.2  |
| 120 | HLA-A*24:02 | Membrane glycoprotein | 95  | 103 | 9  | YFIASFRLF    | Consensus (ann/smm)                    | 0.18 |
| 121 | HLA-A*01:01 | Membrane glycoprotein | 171 | 179 | 9  | ATSRTLSTYY   | Consensus (ann/smm)                    | 0.17 |
| 122 | HLA-A*02:06 | Membrane glycoprotein | 15  | 23  | 9  | KLLEQWNLV    | Consensus (ann/smm)                    | 0.17 |
| 123 | HLA-A*11:01 | Membrane glycoprotein | 170 | 180 | 11 | VATSRTLSTYYK | Consensus (ann/smm)                    | 0.17 |
| 124 | HLA-A*31:01 | Membrane glycoprotein | 93  | 101 | 9  | LSYFIASFR    | Consensus (ann/smm)                    | 0.17 |
| 125 | HLA-A*02:01 | Membrane glycoprotein | 26  | 35  | 10 | FLFLTWICLL   | Consensus (ann/smm)                    | 0.15 |
| 126 | HLA-A*02:01 | Membrane glycoprotein | 51  | 60  | 10 | LIFLWLLWPV   | Consensus (ann/smm)                    | 0.15 |
| 127 | HLA-A*02:01 | Membrane glycoprotein | 50  | 60  | 11 | KLIFLWLLWPV  | Consensus (ann/smm)                    | 0.14 |
| 128 | HLA-A*03:01 | Membrane glycoprotein | 171 | 180 | 10 | ATSRTLSTYYK  | Consensus (ann/smm)                    | 0.14 |
| 129 | HLA-A*24:02 | Membrane glycoprotein | 19  | 28  | 10 | QWNLVIGFLF   | Consensus (ann/smm)                    | 0.14 |
| 130 | HLA-A*33:03 | Membrane glycoprotein | 150 | 158 | 9  | RIAGHHLGR    | netmhcpa_el                            | 0.14 |
| 131 | HLA-A*24:02 | Membrane glycoprotein | 91  | 100 | 10 | MWLSYFIASF   | Consensus (ann/smm)                    | 0.13 |
| 132 | HLA-A*24:02 | Membrane glycoprotein | 94  | 103 | 10 | SYFIASFRLF   | Consensus (ann/smm)                    | 0.11 |
| 133 | HLA-A*33:03 | Membrane glycoprotein | 36  | 44  | 9  | QFAYANRNR    | netmhcpa_el                            | 0.11 |
| 134 | HLA-A*33:03 | Membrane glycoprotein | 99  | 107 | 9  | SFRLFARTR    | netmhcpa_el                            | 0.11 |
| 135 | HLA-A*33:03 | Membrane glycoprotein | 178 | 186 | 9  | YYKLGASQR    | netmhcpa_el                            | 0.11 |
| 136 | HLA-A*33:03 | Membrane glycoprotein | 93  | 101 | 9  | LSYFIASFR    | netmhcpa_el                            | 0.09 |
| 137 | HLA-A*02:06 | Membrane glycoprotein | 51  | 60  | 10 | LIFLWLLWPV   | Consensus (ann/smm)                    | 0.08 |
| 138 | HLA-A*33:03 | Membrane glycoprotein | 97  | 105 | 9  | IASFRLFAR    | netmhcpa_el                            | 0.08 |
| 139 | HLA-A*33:03 | Membrane glycoprotein | 138 | 146 | 9  | LVIGAVILR    | netmhcpa_el                            | 0.07 |
| 140 | HLA-A*11:01 | Membrane glycoprotein | 171 | 180 | 10 | ATSRTLSTYYK  | Consensus (ann/smm)                    | 0.06 |
| 141 | HLA-A*33:03 | Membrane glycoprotein | 142 | 150 | 9  | AVILRGHLR    | netmhcpa_el                            | 0.06 |

|     |             |                             |     |     |    |             |                                        |      |
|-----|-------------|-----------------------------|-----|-----|----|-------------|----------------------------------------|------|
| 142 | HLA-A*31:01 | Nucleocapsid phosphoprotein | 32  | 41  | 10 | RSGARSKQRR  | Consensus (ann/smm)                    | 1    |
| 143 | HLA-A*26:01 | Nucleocapsid phosphoprotein | 307 | 315 | 9  | FAPSASAFF   | Consensus (ann/smm)                    | 0.99 |
| 144 | HLA-A*31:01 | Nucleocapsid phosphoprotein | 361 | 369 | 9  | KTFPPTPEPK  | Consensus (ann/smm)                    | 0.97 |
| 145 | HLA-A*02:06 | Nucleocapsid phosphoprotein | 159 | 167 | 9  | LQLPQGTTL   | Consensus (ann/smm)                    | 0.95 |
| 146 | HLA-A*03:01 | Nucleocapsid phosphoprotein | 338 | 347 | 10 | KLDDKDPNFK  | Consensus (ann/smm)                    | 0.95 |
| 147 | HLA-A*11:01 | Nucleocapsid phosphoprotein | 160 | 169 | 10 | QLPQGTTLPK  | Consensus (ann/smm)                    | 0.95 |
| 148 | HLA-A*24:02 | Nucleocapsid phosphoprotein | 85  | 94  | 10 | GYRRATRRRI  | Consensus (ann/smm)                    | 0.95 |
| 149 | HLA-A*02:06 | Nucleocapsid phosphoprotein | 222 | 230 | 9  | LLDRLNQL    | Consensus (ann/smm)                    | 0.92 |
| 150 | HLA-A*01:01 | Nucleocapsid phosphoprotein | 113 | 123 | 11 | LGTPPEAGLPY | Consensus (ann/smm)                    | 0.9  |
| 151 | HLA-A*31:01 | Nucleocapsid phosphoprotein | 311 | 319 | 9  | ASAFFGMSR   | Consensus (ann/smm)                    | 0.89 |
| 152 | HLA-A*01:01 | Nucleocapsid phosphoprotein | 114 | 123 | 10 | GTGPEAGLPY  | Consensus (ann/smm)                    | 0.88 |
| 153 | HLA-A*33:03 | Nucleocapsid phosphoprotein | 254 | 262 | 9  | ASKKPRQKR   | netmhcpa_el                            | 0.87 |
| 154 | HLA-A*31:01 | Nucleocapsid phosphoprotein | 83  | 92  | 10 | QIGYYRRATR  | Consensus (ann/smm)                    | 0.82 |
| 155 | HLA-A*02:06 | Nucleocapsid phosphoprotein | 389 | 398 | 10 | QQVTLLPAA   | Consensus (ann/smm)                    | 0.81 |
| 156 | HLA-A*26:01 | Nucleocapsid phosphoprotein | 114 | 123 | 10 | GTGPEAGLPY  | Consensus (ann/smm)                    | 0.81 |
| 157 | HLA-A*33:03 | Nucleocapsid phosphoprotein | 78  | 88  | 11 | SSPDDQIGYYR | netmhcpa_el                            | 0.81 |
| 158 | HLA-A*02:01 | Nucleocapsid phosphoprotein | 222 | 230 | 9  | LLDRLNQL    | Consensus (ann/comblib_sidney2008/smm) | 0.8  |
| 159 | HLA-A*33:03 | Nucleocapsid phosphoprotein | 84  | 93  | 10 | IGYYRRATRR  | netmhcpa_el                            | 0.8  |
| 160 | HLA-A*33:03 | Nucleocapsid phosphoprotein | 103 | 111 | 9  | DLSPRWYFY   | netmhcpa_el                            | 0.79 |
| 161 | HLA-A*33:03 | Nucleocapsid phosphoprotein | 267 | 276 | 10 | AYNVTQAFGR  | netmhcpa_el                            | 0.79 |
| 162 | HLA-A*31:01 | Nucleocapsid phosphoprotein | 84  | 93  | 10 | IGYYRRATRR  | Consensus (ann/smm)                    | 0.77 |
| 163 | HLA-A*33:03 | Nucleocapsid phosphoprotein | 83  | 92  | 10 | QIGYYRRATR  | netmhcpa_el                            | 0.76 |
| 164 | HLA-A*33:03 | Nucleocapsid phosphoprotein | 141 | 149 | 9  | TPKDHIQTR   | netmhcpa_el                            | 0.75 |
| 165 | HLA-A*31:01 | Nucleocapsid phosphoprotein | 267 | 276 | 10 | AYNVTQAFGR  | Consensus (ann/smm)                    | 0.74 |
| 166 | HLA-A*31:01 | Nucleocapsid phosphoprotein | 186 | 195 | 10 | SSSRSRNSSR  | Consensus (ann/smm)                    | 0.73 |
| 167 | HLA-A*33:03 | Nucleocapsid phosphoprotein | 183 | 191 | 9  | SSRSSRSR    | netmhcpa_el                            | 0.73 |
| 168 | HLA-A*03:01 | Nucleocapsid phosphoprotein | 93  | 102 | 10 | RIRGGDGKMK  | Consensus (ann/smm)                    | 0.71 |
| 169 | HLA-A*02:01 | Nucleocapsid phosphoprotein | 315 | 324 | 10 | FGMSRIGMEV  | Consensus (ann/smm)                    | 0.7  |
| 170 | HLA-A*31:01 | Nucleocapsid phosphoprotein | 254 | 262 | 9  | ASKKPRQKR   | Consensus (ann/smm)                    | 0.7  |

|     |             |                             |     |     |    |             |                     |      |
|-----|-------------|-----------------------------|-----|-----|----|-------------|---------------------|------|
| 171 | HLA-A*03:01 | Nucleocapsid phosphoprotein | 160 | 169 | 10 | QLPQGTTLPK  | Consensus (ann/smm) | 0.69 |
| 172 | HLA-A*11:01 | Nucleocapsid phosphoprotein | 249 | 257 | 9  | KSAAEASKK   | Consensus (ann/smm) | 0.67 |
| 173 | HLA-A*24:02 | Nucleocapsid phosphoprotein | 306 | 315 | 10 | QFAPSASAFF  | Consensus (ann/smm) | 0.67 |
| 174 | HLA-A*03:01 | Nucleocapsid phosphoprotein | 351 | 361 | 11 | ILLNKHIDAYK | Consensus (ann/smm) | 0.64 |
| 175 | HLA-A*31:01 | Nucleocapsid phosphoprotein | 32  | 40  | 9  | RSGARSKQR   | Consensus (ann/smm) | 0.63 |
| 176 | HLA-A*03:01 | Nucleocapsid phosphoprotein | 361 | 370 | 10 | KTFPPTPEPKK | Consensus (ann/smm) | 0.61 |
| 177 | HLA-A*33:03 | Nucleocapsid phosphoprotein | 312 | 319 | 8  | SAFFGMSR    | netmhspan_el        | 0.57 |
| 178 | HLA-A*01:01 | Nucleocapsid phosphoprotein | 77  | 86  | 10 | NSSPDDQIGY  | Consensus (ann/smm) | 0.56 |
| 179 | HLA-A*02:06 | Nucleocapsid phosphoprotein | 388 | 397 | 10 | KQQTVTLLPA  | Consensus (ann/smm) | 0.55 |
| 180 | HLA-A*31:01 | Nucleocapsid phosphoprotein | 187 | 195 | 9  | SSRSRNSR    | Consensus (ann/smm) | 0.54 |
| 181 | HLA-A*01:01 | Nucleocapsid phosphoprotein | 324 | 333 | 10 | VTPSGTWLTY  | Consensus (ann/smm) | 0.53 |
| 182 | HLA-A*26:01 | Nucleocapsid phosphoprotein | 78  | 87  | 10 | SSPDDQIGYY  | Consensus (ann/smm) | 0.53 |
| 183 | HLA-A*31:01 | Nucleocapsid phosphoprotein | 310 | 319 | 10 | SASAFFGMSR  | Consensus (ann/smm) | 0.52 |
| 184 | HLA-A*33:03 | Nucleocapsid phosphoprotein | 1   | 10  | 10 | MSDNGPQNQR  | netmhspan_el        | 0.52 |
| 185 | HLA-A*33:03 | Nucleocapsid phosphoprotein | 268 | 276 | 9  | YNVTQAFGR   | netmhspan_el        | 0.5  |
| 186 | HLA-A*01:01 | Nucleocapsid phosphoprotein | 77  | 87  | 11 | NSSPDDQIGYY | Consensus (ann/smm) | 0.49 |
| 187 | HLA-A*11:01 | Nucleocapsid phosphoprotein | 310 | 319 | 10 | SASAFFGMSR  | Consensus (ann/smm) | 0.47 |
| 188 | HLA-A*03:01 | Nucleocapsid phosphoprotein | 249 | 257 | 9  | KSAAEASKK   | Consensus (ann/smm) | 0.45 |
| 189 | HLA-A*31:01 | Nucleocapsid phosphoprotein | 85  | 93  | 9  | GYRRATRR    | Consensus (ann/smm) | 0.45 |
| 190 | HLA-A*03:01 | Nucleocapsid phosphoprotein | 352 | 361 | 10 | LLNKHIDAYK  | Consensus (ann/smm) | 0.43 |
| 191 | HLA-A*33:03 | Nucleocapsid phosphoprotein | 85  | 93  | 9  | GYRRATRR    | netmhspan_el        | 0.43 |
| 192 | HLA-A*33:03 | Nucleocapsid phosphoprotein | 310 | 319 | 10 | SASAFFGMSR  | netmhspan_el        | 0.4  |
| 193 | HLA-A*26:01 | Nucleocapsid phosphoprotein | 290 | 298 | 9  | ELIRQGTDY   | Consensus (ann/smm) | 0.39 |
| 194 | HLA-A*33:03 | Nucleocapsid phosphoprotein | 285 | 293 | 9  | NFGDQELIR   | netmhspan_el        | 0.39 |
| 195 | HLA-A*11:01 | Nucleocapsid phosphoprotein | 311 | 319 | 9  | ASAFFGMSR   | Consensus (ann/smm) | 0.38 |
| 196 | HLA-A*31:01 | Nucleocapsid phosphoprotein | 84  | 92  | 9  | IGYRRATR    | Consensus (ann/smm) | 0.38 |
| 197 | HLA-A*33:03 | Nucleocapsid phosphoprotein | 187 | 195 | 9  | SSRSRNSR    | netmhspan_el        | 0.36 |
| 198 | HLA-A*01:01 | Nucleocapsid phosphoprotein | 103 | 112 | 10 | DLSRWYFY    | Consensus (ann/smm) | 0.35 |
| 199 | HLA-A*11:01 | Nucleocapsid phosphoprotein | 134 | 143 | 10 | ATEGALNTPK  | Consensus (ann/smm) | 0.34 |

|     |             |                             |      |      |    |             |                     |      |
|-----|-------------|-----------------------------|------|------|----|-------------|---------------------|------|
| 200 | HLA-A*26:01 | Nucleocapsid phosphoprotein | 103  | 112  | 10 | DLSPRWYFYF  | Consensus (ann/smm) | 0.31 |
| 201 | HLA-A*33:03 | Nucleocapsid phosphoprotein | 181  | 189  | 9  | QASSRSSSR   | netmhcpa_el         | 0.29 |
| 202 | HLA-A*11:01 | Nucleocapsid phosphoprotein | 361  | 370  | 10 | KTFPPTEPKK  | Consensus (ann/smm) | 0.28 |
| 203 | HLA-A*24:02 | Nucleocapsid phosphoprotein | 86   | 94   | 9  | YRRATRRRI   | Consensus (ann/smm) | 0.26 |
| 204 | HLA-A*33:03 | Nucleocapsid phosphoprotein | 201  | 209  | 9  | SSRGTSPPAR  | netmhcpa_el         | 0.25 |
| 205 | HLA-A*33:03 | Nucleocapsid phosphoprotein | 140  | 149  | 10 | NTPKDHIGTR  | netmhcpa_el         | 0.24 |
| 206 | HLA-A*03:01 | Nucleocapsid phosphoprotein | 361  | 369  | 9  | KTFPPTEPK   | Consensus (ann/smm) | 0.23 |
| 207 | HLA-A*01:01 | Nucleocapsid phosphoprotein | 104  | 112  | 9  | LSPRWYFYF   | Consensus (ann/smm) | 0.22 |
| 208 | HLA-A*01:01 | Nucleocapsid phosphoprotein | 78   | 87   | 10 | SSPDDQIGYY  | Consensus (ann/smm) | 0.2  |
| 209 | HLA-A*33:03 | Nucleocapsid phosphoprotein | 84   | 92   | 9  | IGYRRATR    | netmhcpa_el         | 0.2  |
| 210 | HLA-A*33:03 | Nucleocapsid phosphoprotein | 311  | 319  | 9  | ASAFFGMSR   | netmhcpa_el         | 0.17 |
| 211 | HLA-A*31:01 | Nucleocapsid phosphoprotein | 100  | 107  | 8  | KMKDLSPP    | ann                 | 0.15 |
| 212 | HLA-A*11:01 | Nucleocapsid phosphoprotein | 361  | 369  | 9  | KTFPPTEPK   | Consensus (ann/smm) | 0.11 |
| 213 | HLA-A*33:03 | Nucleocapsid phosphoprotein | 269  | 277  | 9  | NVTQAFGR    | netmhcpa_el         | 0.11 |
| 214 | HLA-A*11:01 | ORF10 protein               | 11   | 20   | 10 | FTIYSLLCR   | Consensus (ann/smm) | 0.97 |
| 215 | HLA-A*02:06 | ORF10 protein               | 28   | 37   | 10 | AQVDVVNFNL  | Consensus (ann/smm) | 0.95 |
| 216 | HLA-A*33:03 | ORF10 protein               | 16   | 24   | 9  | LLLCRMNSR   | netmhcpa_el         | 0.91 |
| 217 | HLA-A*24:02 | ORF10 protein               | 13   | 21   | 9  | IYSLLCRM    | Consensus (ann/smm) | 0.88 |
| 218 | HLA-A*03:01 | ORF10 protein               | 12   | 20   | 9  | TIYSLLCR    | Consensus (ann/smm) | 0.77 |
| 219 | HLA-A*02:01 | ORF10 protein               | 7    | 16   | 10 | FAFPFTIYSL  | Consensus (ann/smm) | 0.58 |
| 220 | HLA-A*26:01 | ORF10 protein               | 11   | 19   | 9  | FTIYSLLC    | Consensus (ann/smm) | 0.54 |
| 221 | HLA-A*11:01 | ORF10 protein               | 12   | 20   | 9  | TIYSLLCR    | Consensus (ann/smm) | 0.53 |
| 222 | HLA-A*02:06 | ORF10 protein               | 7    | 16   | 10 | FAFPFTIYSL  | Consensus (ann/smm) | 0.48 |
| 223 | HLA-A*26:01 | ORF10 protein               | 5    | 14   | 10 | NVFAFPFTIY  | Consensus (ann/smm) | 0.48 |
| 224 | HLA-A*33:03 | ORF10 protein               | 12   | 20   | 9  | TIYSLLCR    | netmhcpa_el         | 0.27 |
| 225 | HLA-A*24:02 | ORF10 protein               | 2    | 11   | 10 | GYINVFAFPF  | Consensus (ann/smm) | 0.13 |
| 226 | HLA-A*01:01 | orf1ab polyprotein          | 614  | 621  | 8  | TNIFGTVY    | Consensus (ann/smm) | 1    |
| 227 | HLA-A*01:01 | orf1ab polyprotein          | 219  | 229  | 11 | LDVIDTKRGVY | Consensus (ann/smm) | 1    |
| 228 | HLA-A*01:01 | orf1ab polyprotein          | 1246 | 1256 | 11 | TKFLTENLLLY | Consensus (ann/smm) | 1    |

|     |             |                    |      |      |    |             |                                        |      |
|-----|-------------|--------------------|------|------|----|-------------|----------------------------------------|------|
| 229 | HLA-A*01:01 | orf1ab polyprotein | 2383 | 2392 | 10 | MYIFFASFYY  | Consensus (ann/smm)                    | 1    |
| 230 | HLA-A*01:01 | orf1ab polyprotein | 2925 | 2934 | 10 | ASGKPVPCYCY | Consensus (ann/smm)                    | 1    |
| 231 | HLA-A*01:01 | orf1ab polyprotein | 5614 | 5623 | 10 | HFAIGLALYY  | Consensus (ann/smm)                    | 1    |
| 232 | HLA-A*02:01 | orf1ab polyprotein | 2373 | 2381 | 9  | QMAPISAMV   | Consensus (ann/comblib_sidney2008/smm) | 1    |
| 233 | HLA-A*02:01 | orf1ab polyprotein | 2596 | 2604 | 9  | NTFSSTFNV   | Consensus (ann/comblib_sidney2008/smm) | 1    |
| 234 | HLA-A*02:01 | orf1ab polyprotein | 3026 | 3034 | 9  | LLTNMFTPL   | Consensus (ann/comblib_sidney2008/smm) | 1    |
| 235 | HLA-A*02:01 | orf1ab polyprotein | 3605 | 3613 | 9  | FLYENAFPL   | Consensus (ann/comblib_sidney2008/smm) | 1    |
| 236 | HLA-A*02:01 | orf1ab polyprotein | 3678 | 3686 | 9  | KLKDCVMYA   | Consensus (ann/comblib_sidney2008/smm) | 1    |
| 237 | HLA-A*02:01 | orf1ab polyprotein | 6204 | 6212 | 9  | CLAVHECFV   | Consensus (ann/comblib_sidney2008/smm) | 1    |
| 238 | HLA-A*02:01 | orf1ab polyprotein | 6453 | 6461 | 9  | SLENVAFNV   | Consensus (ann/comblib_sidney2008/smm) | 1    |
| 239 | HLA-A*02:06 | orf1ab polyprotein | 579  | 587  | 9  | RLIDAMMFT   | Consensus (ann/smm)                    | 1    |
| 240 | HLA-A*03:01 | orf1ab polyprotein | 5823 | 5832 | 10 | FLTRNPAWRK  | Consensus (ann/smm)                    | 1    |
| 241 | HLA-A*11:01 | orf1ab polyprotein | 3258 | 3268 | 11 | TSAVLQSGFRK | Consensus (ann/smm)                    | 1    |
| 242 | HLA-A*11:01 | orf1ab polyprotein | 1768 | 1776 | 9  | VMYMGTLSTY  | Consensus (ann/smm)                    | 1    |
| 243 | HLA-A*11:01 | orf1ab polyprotein | 4216 | 4224 | 9  | VTDTPKGP    | Consensus (ann/smm)                    | 1    |
| 244 | HLA-A*24:02 | orf1ab polyprotein | 4659 | 4667 | 9  | KWDLLKYDF   | Consensus (ann/smm)                    | 1    |
| 245 | HLA-A*24:02 | orf1ab polyprotein | 1422 | 1431 | 10 | FYFYTSKTTV  | Consensus (ann/smm)                    | 1    |
| 246 | HLA-A*24:02 | orf1ab polyprotein | 2164 | 2173 | 10 | VCTNYMPYFF  | Consensus (ann/smm)                    | 1    |
| 247 | HLA-A*24:02 | orf1ab polyprotein | 2383 | 2392 | 10 | MYIFFASFYY  | Consensus (ann/smm)                    | 1    |
| 248 | HLA-A*26:01 | orf1ab polyprotein | 1127 | 1135 | 9  | DIQLLKSA    | Consensus (ann/smm)                    | 1    |
| 249 | HLA-A*26:01 | orf1ab polyprotein | 2345 | 2353 | 9  | AIMQLFFSY   | Consensus (ann/smm)                    | 1    |
| 250 | HLA-A*31:01 | orf1ab polyprotein | 3058 | 3066 | 9  | TCLAYYFMR   | Consensus (ann/smm)                    | 1    |
| 251 | HLA-A*31:01 | orf1ab polyprotein | 3153 | 3162 | 10 | FYWFFSNYK   | Consensus (ann/smm)                    | 1    |
| 252 | HLA-A*33:03 | orf1ab polyprotein | 4809 | 4818 | 10 | KDFYDFAVSK  | netmhcpa_el                            | 1    |
| 253 | HLA-A*33:03 | orf1ab polyprotein | 6320 | 6329 | 10 | NSIVCRFDTR  | netmhcpa_el                            | 1    |
| 254 | HLA-A*01:01 | orf1ab polyprotein | 2384 | 2392 | 9  | YIFFASFYY   | Consensus (ann/smm)                    | 0.99 |
| 255 | HLA-A*01:01 | orf1ab polyprotein | 7030 | 7040 | 11 | RNTNPIQLSSY | Consensus (ann/smm)                    | 0.99 |
| 256 | HLA-A*01:01 | orf1ab polyprotein | 1818 | 1827 | 10 | HGTFTCASEY  | Consensus (ann/smm)                    | 0.99 |
| 257 | HLA-A*02:01 | orf1ab polyprotein | 3709 | 3718 | 10 | WTLMNVLT    | Consensus (ann/smm)                    | 0.99 |

|     |             |                    |      |      |    |             |                     |      |
|-----|-------------|--------------------|------|------|----|-------------|---------------------|------|
| 258 | HLA-A*02:06 | orf1ab polyprotein | 1083 | 1092 | 10 | MQVESDDYIA  | Consensus (ann/smm) | 0.99 |
| 259 | HLA-A*02:06 | orf1ab polyprotein | 2322 | 2330 | 9  | GLVAEWFLA   | Consensus (ann/smm) | 0.99 |
| 260 | HLA-A*03:01 | orf1ab polyprotein | 2727 | 2735 | 9  | KQIRSAACK   | Consensus (ann/smm) | 0.99 |
| 261 | HLA-A*03:01 | orf1ab polyprotein | 273  | 282  | 10 | FVFPLNSIIK  | Consensus (ann/smm) | 0.99 |
| 262 | HLA-A*03:01 | orf1ab polyprotein | 3351 | 3360 | 10 | KLKVDTANPK  | Consensus (ann/smm) | 0.99 |
| 263 | HLA-A*03:01 | orf1ab polyprotein | 6428 | 6437 | 10 | SAGFSLWVYK  | Consensus (ann/smm) | 0.99 |
| 264 | HLA-A*03:01 | orf1ab polyprotein | 1378 | 1387 | 10 | MLAHAEETRK  | Consensus (ann/smm) | 0.99 |
| 265 | HLA-A*11:01 | orf1ab polyprotein | 1170 | 1180 | 11 | RTNVYLAVFDK | Consensus (ann/smm) | 0.99 |
| 266 | HLA-A*24:02 | orf1ab polyprotein | 2378 | 2387 | 10 | SAMVRMYIFF  | Consensus (ann/smm) | 0.99 |
| 267 | HLA-A*24:02 | orf1ab polyprotein | 834  | 843  | 10 | QGYKSVNITF  | Consensus (ann/smm) | 0.99 |
| 268 | HLA-A*24:02 | orf1ab polyprotein | 2269 | 2278 | 10 | GYLNSTNVTI  | Consensus (ann/smm) | 0.99 |
| 269 | HLA-A*26:01 | orf1ab polyprotein | 2960 | 2968 | 9  | SIIQFPNTY   | Consensus (ann/smm) | 0.99 |
| 270 | HLA-A*26:01 | orf1ab polyprotein | 3735 | 3744 | 10 | ALIISVTSNY  | Consensus (ann/smm) | 0.99 |
| 271 | HLA-A*31:01 | orf1ab polyprotein | 5016 | 5023 | 8  | RAMPNMLR    | ann                 | 0.99 |
| 272 | HLA-A*33:03 | orf1ab polyprotein | 282  | 290  | 9  | KTIQPRVEK   | netmhcpa_el         | 0.99 |
| 273 | HLA-A*33:03 | orf1ab polyprotein | 2434 | 2442 | 9  | FVYANGGK    | netmhcpa_el         | 0.99 |
| 274 | HLA-A*33:03 | orf1ab polyprotein | 2995 | 3003 | 9  | GVCVSTSGR   | netmhcpa_el         | 0.99 |
| 275 | HLA-A*33:03 | orf1ab polyprotein | 3386 | 3394 | 9  | SGVYQCAMR   | netmhcpa_el         | 0.99 |
| 276 | HLA-A*33:03 | orf1ab polyprotein | 4142 | 4150 | 9  | NELSPVALR   | netmhcpa_el         | 0.99 |
| 277 | HLA-A*33:03 | orf1ab polyprotein | 5015 | 5023 | 9  | DRAMPNMLR   | netmhcpa_el         | 0.99 |
| 278 | HLA-A*33:03 | orf1ab polyprotein | 2676 | 2686 | 11 | TYNKVENMTPR | netmhcpa_el         | 0.99 |
| 279 | HLA-A*01:01 | orf1ab polyprotein | 4757 | 4766 | 10 | RLSFKELLVY  | Consensus (ann/smm) | 0.98 |
| 280 | HLA-A*02:01 | orf1ab polyprotein | 3183 | 3192 | 10 | FLLNKEMYLK  | Consensus (ann/smm) | 0.98 |
| 281 | HLA-A*02:01 | orf1ab polyprotein | 4698 | 4707 | 10 | CILHCANFNV  | Consensus (ann/smm) | 0.98 |
| 282 | HLA-A*02:06 | orf1ab polyprotein | 2864 | 2873 | 10 | FVVPGLPGTI  | Consensus (ann/smm) | 0.98 |
| 283 | HLA-A*03:01 | orf1ab polyprotein | 2210 | 2219 | 10 | CLEASFNYLK  | Consensus (ann/smm) | 0.98 |
| 284 | HLA-A*03:01 | orf1ab polyprotein | 4129 | 4138 | 10 | TALRANSVVK  | Consensus (ann/smm) | 0.98 |
| 285 | HLA-A*03:01 | orf1ab polyprotein | 1296 | 1304 | 9  | LTAVVIPTK   | Consensus (ann/smm) | 0.98 |
| 286 | HLA-A*11:01 | orf1ab polyprotein | 906  | 915  | 10 | YLFDESGEFK  | Consensus (ann/smm) | 0.98 |

|     |             |                    |      |      |    |             |                                        |      |
|-----|-------------|--------------------|------|------|----|-------------|----------------------------------------|------|
| 287 | HLA-A*11:01 | orf1ab polyprotein | 4270 | 4278 | 9  | CAFAVDAAK   | Consensus (ann/smm)                    | 0.98 |
| 288 | HLA-A*11:01 | orf1ab polyprotein | 2732 | 2741 | 10 | AAKKNLPPFK  | Consensus (ann/smm)                    | 0.98 |
| 289 | HLA-A*24:02 | orf1ab polyprotein | 2330 | 2339 | 10 | AYILFTRFFY  | Consensus (ann/smm)                    | 0.98 |
| 290 | HLA-A*24:02 | orf1ab polyprotein | 3391 | 3399 | 9  | CAMRPNFTI   | Consensus (ann/smm)                    | 0.98 |
| 291 | HLA-A*26:01 | orf1ab polyprotein | 3152 | 3160 | 9  | HFYWFFSNY   | Consensus (ann/smm)                    | 0.98 |
| 292 | HLA-A*33:03 | orf1ab polyprotein | 2192 | 2200 | 9  | ASMPTTIK    | netmhcpa_el                            | 0.98 |
| 293 | HLA-A*33:03 | orf1ab polyprotein | 3443 | 3452 | 10 | NFYGPFVDRQ  | netmhcpa_el                            | 0.98 |
| 294 | HLA-A*33:03 | orf1ab polyprotein | 4952 | 4961 | 10 | VSICSTMTNR  | netmhcpa_el                            | 0.98 |
| 295 | HLA-A*01:01 | orf1ab polyprotein | 3646 | 3654 | 9  | TVAYFNMVY   | Consensus (ann/smm)                    | 0.97 |
| 296 | HLA-A*02:01 | orf1ab polyprotein | 480  | 488  | 9  | FSASTSAFV   | Consensus (ann/comblib_sidney2008/smm) | 0.97 |
| 297 | HLA-A*02:01 | orf1ab polyprotein | 2234 | 2243 | 10 | LLSVCLGSL   | Consensus (ann/smm)                    | 0.97 |
| 298 | HLA-A*02:06 | orf1ab polyprotein | 14   | 23   | 10 | VQLSLPVLQV  | Consensus (ann/smm)                    | 0.97 |
| 299 | HLA-A*02:06 | orf1ab polyprotein | 3085 | 3094 | 10 | FLMSFTVLCL  | Consensus (ann/smm)                    | 0.97 |
| 300 | HLA-A*02:06 | orf1ab polyprotein | 5848 | 5857 | 10 | KILGLPTQTV  | Consensus (ann/smm)                    | 0.97 |
| 301 | HLA-A*02:06 | orf1ab polyprotein | 5023 | 5031 | 9  | RIMASLVLA   | Consensus (ann/smm)                    | 0.97 |
| 302 | HLA-A*03:01 | orf1ab polyprotein | 693  | 701  | 9  | IIGGAKLK    | Consensus (ann/smm)                    | 0.97 |
| 303 | HLA-A*03:01 | orf1ab polyprotein | 3672 | 3680 | 9  | TLSGFKFK    | Consensus (ann/smm)                    | 0.97 |
| 304 | HLA-A*03:01 | orf1ab polyprotein | 1355 | 1364 | 10 | ILPSIISNEK  | Consensus (ann/smm)                    | 0.97 |
| 305 | HLA-A*11:01 | orf1ab polyprotein | 3565 | 3573 | 9  | GVTFQSAVK   | Consensus (ann/smm)                    | 0.97 |
| 306 | HLA-A*26:01 | orf1ab polyprotein | 2357 | 2365 | 9  | HFISNSWLM   | Consensus (ann/smm)                    | 0.97 |
| 307 | HLA-A*26:01 | orf1ab polyprotein | 4518 | 4526 | 9  | DLVYALRHF   | Consensus (ann/smm)                    | 0.97 |
| 308 | HLA-A*26:01 | orf1ab polyprotein | 1021 | 1028 | 8  | QTIEVNSF    | Consensus (ann/smm)                    | 0.97 |
| 309 | HLA-A*26:01 | orf1ab polyprotein | 3646 | 3655 | 10 | TVAYFNMVYM  | Consensus (ann/smm)                    | 0.97 |
| 310 | HLA-A*26:01 | orf1ab polyprotein | 5630 | 5638 | 9  | YTACSHAAV   | Consensus (ann/smm)                    | 0.97 |
| 311 | HLA-A*31:01 | orf1ab polyprotein | 6365 | 6373 | 9  | KQLPFFYYS   | Consensus (ann/smm)                    | 0.97 |
| 312 | HLA-A*33:03 | orf1ab polyprotein | 5760 | 5767 | 8  | MFLGTCRR    | netmhcpa_el                            | 0.97 |
| 313 | HLA-A*33:03 | orf1ab polyprotein | 5824 | 5831 | 8  | LTRNPAWR    | netmhcpa_el                            | 0.97 |
| 314 | HLA-A*01:01 | orf1ab polyprotein | 6851 | 6861 | 11 | YLNTLTLAVPY | Consensus (ann/smm)                    | 0.96 |
| 315 | HLA-A*01:01 | orf1ab polyprotein | 4415 | 4424 | 10 | GTGTSTDVYV  | Consensus (ann/smm)                    | 0.96 |

|     |             |                    |      |      |    |             |                     |      |
|-----|-------------|--------------------|------|------|----|-------------|---------------------|------|
| 316 | HLA-A*02:01 | orf1ab polyprotein | 6245 | 6254 | 10 | ALLADKFPVL  | Consensus (ann/smm) | 0.96 |
| 317 | HLA-A*02:06 | orf1ab polyprotein | 5180 | 5189 | 10 | YQNNVFMSEA  | Consensus (ann/smm) | 0.96 |
| 318 | HLA-A*03:01 | orf1ab polyprotein | 6532 | 6541 | 10 | AANTVIWDYK  | Consensus (ann/smm) | 0.96 |
| 319 | HLA-A*03:01 | orf1ab polyprotein | 5254 | 5263 | 10 | LAIDAYPLTK  | Consensus (ann/smm) | 0.96 |
| 320 | HLA-A*11:01 | orf1ab polyprotein | 6647 | 6656 | 10 | TQSRNLQEFK  | Consensus (ann/smm) | 0.96 |
| 321 | HLA-A*11:01 | orf1ab polyprotein | 5792 | 5800 | 9  | SAQCFKMFY   | Consensus (ann/smm) | 0.96 |
| 322 | HLA-A*11:01 | orf1ab polyprotein | 6386 | 6394 | 9  | SDIDYVPLK   | Consensus (ann/smm) | 0.96 |
| 323 | HLA-A*24:02 | orf1ab polyprotein | 6316 | 6324 | 9  | RYPANSIVC   | Consensus (ann/smm) | 0.96 |
| 324 | HLA-A*24:02 | orf1ab polyprotein | 4025 | 4034 | 10 | VTSAMQTMLF  | Consensus (ann/smm) | 0.96 |
| 325 | HLA-A*26:01 | orf1ab polyprotein | 2088 | 2096 | 9  | EEVGHTDLM   | Consensus (ann/smm) | 0.96 |
| 326 | HLA-A*26:01 | orf1ab polyprotein | 3753 | 3761 | 9  | FLARGIVFM   | Consensus (ann/smm) | 0.96 |
| 327 | HLA-A*26:01 | orf1ab polyprotein | 1503 | 1512 | 10 | ETISLAGSYK  | Consensus (ann/smm) | 0.96 |
| 328 | HLA-A*26:01 | orf1ab polyprotein | 7020 | 7028 | 9  | YVMHANYIF   | Consensus (ann/smm) | 0.96 |
| 329 | HLA-A*31:01 | orf1ab polyprotein | 3748 | 3756 | 9  | VTTVMFLAR   | Consensus (ann/smm) | 0.96 |
| 330 | HLA-A*33:03 | orf1ab polyprotein | 4897 | 4905 | 9  | PFNKWVKAR   | netmhcpa_el         | 0.96 |
| 331 | HLA-A*33:03 | orf1ab polyprotein | 7069 | 7077 | 9  | ILSLSKGR    | netmhcpa_el         | 0.96 |
| 332 | HLA-A*33:03 | orf1ab polyprotein | 3749 | 3756 | 8  | TTVMFLAR    | netmhcpa_el         | 0.96 |
| 333 | HLA-A*33:03 | orf1ab polyprotein | 4750 | 4757 | 8  | DVNLHSSR    | netmhcpa_el         | 0.96 |
| 334 | HLA-A*33:03 | orf1ab polyprotein | 6120 | 6130 | 11 | MKYFVKIGPER | netmhcpa_el         | 0.96 |
| 335 | HLA-A*33:03 | orf1ab polyprotein | 1176 | 1185 | 10 | AVFDKNLYDK  | netmhcpa_el         | 0.96 |
| 336 | HLA-A*33:03 | orf1ab polyprotein | 4499 | 4508 | 10 | DGDMVPHISR  | netmhcpa_el         | 0.96 |
| 337 | HLA-A*01:01 | orf1ab polyprotein | 2665 | 2673 | 9  | VTGDSCNNY   | Consensus (ann/smm) | 0.95 |
| 338 | HLA-A*01:01 | orf1ab polyprotein | 4998 | 5006 | 9  | YSDVENPHL   | Consensus (ann/smm) | 0.95 |
| 339 | HLA-A*01:01 | orf1ab polyprotein | 895  | 905  | 11 | IDLDEWSMATY | Consensus (ann/smm) | 0.95 |
| 340 | HLA-A*02:01 | orf1ab polyprotein | 5147 | 5156 | 10 | MMILSDDAVV  | Consensus (ann/smm) | 0.95 |
| 341 | HLA-A*02:01 | orf1ab polyprotein | 3691 | 3700 | 10 | LLILMTARTV  | Consensus (ann/smm) | 0.95 |
| 342 | HLA-A*02:06 | orf1ab polyprotein | 6907 | 6916 | 10 | STLIGDCATV  | Consensus (ann/smm) | 0.95 |
| 343 | HLA-A*02:06 | orf1ab polyprotein | 5674 | 5684 | 11 | STLEQYVFCTV | Consensus (ann/smm) | 0.95 |
| 344 | HLA-A*02:06 | orf1ab polyprotein | 3652 | 3660 | 9  | MVYMPASWV   | Consensus (ann/smm) | 0.95 |

|     |             |                    |      |      |    |             |                     |      |
|-----|-------------|--------------------|------|------|----|-------------|---------------------|------|
| 345 | HLA-A*03:01 | orf1ab polyprotein | 483  | 492  | 10 | STSAFVETVK  | Consensus (ann/smm) | 0.95 |
| 346 | HLA-A*11:01 | orf1ab polyprotein | 2404 | 2414 | 11 | CNSSTCMMCYK | Consensus (ann/smm) | 0.95 |
| 347 | HLA-A*11:01 | orf1ab polyprotein | 2800 | 2810 | 11 | TDFSSEIIGYK | Consensus (ann/smm) | 0.95 |
| 348 | HLA-A*11:01 | orf1ab polyprotein | 5602 | 5612 | 11 | STLQGPPGTGK | Consensus (ann/smm) | 0.95 |
| 349 | HLA-A*11:01 | orf1ab polyprotein | 2919 | 2928 | 10 | CTIFKDasGK  | Consensus (ann/smm) | 0.95 |
| 350 | HLA-A*11:01 | orf1ab polyprotein | 5166 | 5175 | 10 | GLVASIKNFK  | Consensus (ann/smm) | 0.95 |
| 351 | HLA-A*11:01 | orf1ab polyprotein | 2387 | 2395 | 9  | FASFYYVWK   | Consensus (ann/smm) | 0.95 |
| 352 | HLA-A*24:02 | orf1ab polyprotein | 4912 | 4920 | 9  | SYEDQDALF   | Consensus (ann/smm) | 0.95 |
| 353 | HLA-A*24:02 | orf1ab polyprotein | 3010 | 3019 | 10 | YYRSLPGVFC  | Consensus (ann/smm) | 0.95 |
| 354 | HLA-A*24:02 | orf1ab polyprotein | 3792 | 3801 | 10 | CYFGLFLLN   | Consensus (ann/smm) | 0.95 |
| 355 | HLA-A*24:02 | orf1ab polyprotein | 4685 | 4694 | 10 | TYHPNCVNCL  | Consensus (ann/smm) | 0.95 |
| 356 | HLA-A*24:02 | orf1ab polyprotein | 5404 | 5414 | 11 | SFPLCANGQVF | Consensus (ann/smm) | 0.95 |
| 357 | HLA-A*24:02 | orf1ab polyprotein | 6783 | 6793 | 11 | LWCKDGHVETF | Consensus (ann/smm) | 0.95 |
| 358 | HLA-A*26:01 | orf1ab polyprotein | 1572 | 1580 | 9  | TTVDNINLH   | Consensus (ann/smm) | 0.95 |
| 359 | HLA-A*26:01 | orf1ab polyprotein | 3144 | 3153 | 10 | YIICISTKHF  | Consensus (ann/smm) | 0.95 |
| 360 | HLA-A*26:01 | orf1ab polyprotein | 3558 | 3566 | 9  | DVVRQCSGV   | Consensus (ann/smm) | 0.95 |
| 361 | HLA-A*31:01 | orf1ab polyprotein | 3654 | 3662 | 9  | YMPASWVMR   | Consensus (ann/smm) | 0.95 |
| 362 | HLA-A*31:01 | orf1ab polyprotein | 5654 | 5663 | 10 | CSRIIPARAR  | Consensus (ann/smm) | 0.95 |
| 363 | HLA-A*33:03 | orf1ab polyprotein | 2259 | 2267 | 9  | MPSYCTGYR   | netmhcpa_el         | 0.95 |
| 364 | HLA-A*33:03 | orf1ab polyprotein | 4073 | 4081 | 9  | VIPDYNTYK   | netmhcpa_el         | 0.95 |
| 365 | HLA-A*33:03 | orf1ab polyprotein | 5840 | 5848 | 9  | NSQNAVASK   | netmhcpa_el         | 0.95 |
| 366 | HLA-A*33:03 | orf1ab polyprotein | 6080 | 6088 | 9  | KGLPWNVVR   | netmhcpa_el         | 0.95 |
| 367 | HLA-A*33:03 | orf1ab polyprotein | 4031 | 4038 | 8  | TMLFTMLR    | netmhcpa_el         | 0.95 |
| 368 | HLA-A*33:03 | orf1ab polyprotein | 4839 | 4849 | 11 | NAAISDYDYR  | netmhcpa_el         | 0.95 |
| 369 | HLA-A*33:03 | orf1ab polyprotein | 4662 | 4671 | 10 | LLKYDFTEER  | netmhcpa_el         | 0.95 |
| 370 | HLA-A*33:03 | orf1ab polyprotein | 7021 | 7030 | 10 | VMHANYIFWR  | netmhcpa_el         | 0.95 |
| 371 | HLA-A*01:01 | orf1ab polyprotein | 1725 | 1734 | 10 | LGDVRETMSY  | Consensus (ann/smm) | 0.94 |
| 372 | HLA-A*01:01 | orf1ab polyprotein | 2896 | 2905 | 10 | CYTPSKLIEY  | Consensus (ann/smm) | 0.94 |
| 373 | HLA-A*02:01 | orf1ab polyprotein | 1248 | 1258 | 11 | FLTENLLYID  | Consensus (ann/smm) | 0.94 |

|     |             |                    |      |      |    |             |                     |      |
|-----|-------------|--------------------|------|------|----|-------------|---------------------|------|
| 374 | HLA-A*02:01 | orf1ab polyprotein | 3583 | 3592 | 10 | LLLTILTSL   | Consensus (ann/smm) | 0.94 |
| 375 | HLA-A*02:06 | orf1ab polyprotein | 4859 | 4868 | 10 | RQLLFVVEVV  | Consensus (ann/smm) | 0.94 |
| 376 | HLA-A*02:06 | orf1ab polyprotein | 3583 | 3591 | 9  | LLLTILTSL   | Consensus (ann/smm) | 0.94 |
| 377 | HLA-A*02:06 | orf1ab polyprotein | 6782 | 6790 | 9  | MLWCKDGHV   | Consensus (ann/smm) | 0.94 |
| 378 | HLA-A*02:06 | orf1ab polyprotein | 3659 | 3667 | 9  | WVMRIMTWL   | Consensus (ann/smm) | 0.94 |
| 379 | HLA-A*03:01 | orf1ab polyprotein | 6117 | 6125 | 9  | LTSMKYFVK   | Consensus (ann/smm) | 0.94 |
| 380 | HLA-A*03:01 | orf1ab polyprotein | 1712 | 1720 | 9  | ALILAYCNK   | Consensus (ann/smm) | 0.94 |
| 381 | HLA-A*03:01 | orf1ab polyprotein | 6072 | 6080 | 9  | KHLIPLMYK   | Consensus (ann/smm) | 0.94 |
| 382 | HLA-A*03:01 | orf1ab polyprotein | 5470 | 5479 | 10 | KLSYGIATVR  | Consensus (ann/smm) | 0.94 |
| 383 | HLA-A*11:01 | orf1ab polyprotein | 5516 | 5526 | 11 | KVQIGEYTFEK | Consensus (ann/smm) | 0.94 |
| 384 | HLA-A*11:01 | orf1ab polyprotein | 5925 | 5934 | 10 | QAENVTGLFK  | Consensus (ann/smm) | 0.94 |
| 385 | HLA-A*11:01 | orf1ab polyprotein | 2487 | 2497 | 11 | SSYIVDSVTVK | Consensus (ann/smm) | 0.94 |
| 386 | HLA-A*24:02 | orf1ab polyprotein | 4026 | 4034 | 9  | TSAMQTMLF   | Consensus (ann/smm) | 0.94 |
| 387 | HLA-A*24:02 | orf1ab polyprotein | 6006 | 6014 | 9  | RHVRAWIGF   | Consensus (ann/smm) | 0.94 |
| 388 | HLA-A*24:02 | orf1ab polyprotein | 6106 | 6115 | 10 | VVFVLWAHGF  | Consensus (ann/smm) | 0.94 |
| 389 | HLA-A*26:01 | orf1ab polyprotein | 1625 | 1634 | 10 | DTLRVEAFEY  | Consensus (ann/smm) | 0.94 |
| 390 | HLA-A*33:03 | orf1ab polyprotein | 460  | 468  | 9  | NINIVGDFK   | netmhcpa_el         | 0.94 |
| 391 | HLA-A*33:03 | orf1ab polyprotein | 5025 | 5032 | 8  | MASLVLAR    | netmhcpa_el         | 0.94 |
| 392 | HLA-A*33:03 | orf1ab polyprotein | 175  | 184  | 10 | RELNGGAYTR  | netmhcpa_el         | 0.94 |
| 393 | HLA-A*33:03 | orf1ab polyprotein | 4566 | 4575 | 10 | VYANLGERVR  | netmhcpa_el         | 0.94 |
| 394 | HLA-A*01:01 | orf1ab polyprotein | 2905 | 2914 | 10 | YDFATSACV   | Consensus (ann/smm) | 0.93 |
| 395 | HLA-A*03:01 | orf1ab polyprotein | 4273 | 4281 | 9  | AVDAAKAYK   | Consensus (ann/smm) | 0.93 |
| 396 | HLA-A*03:01 | orf1ab polyprotein | 6241 | 6250 | 10 | VVKAALLADK  | Consensus (ann/smm) | 0.93 |
| 397 | HLA-A*11:01 | orf1ab polyprotein | 3824 | 3832 | 9  | NSQGLLPPK   | Consensus (ann/smm) | 0.93 |
| 398 | HLA-A*26:01 | orf1ab polyprotein | 4862 | 4871 | 10 | LFVVEVDKY   | Consensus (ann/smm) | 0.93 |
| 399 | HLA-A*26:01 | orf1ab polyprotein | 878  | 886  | 9  | AVIKTLQPV   | Consensus (ann/smm) | 0.93 |
| 400 | HLA-A*31:01 | orf1ab polyprotein | 2258 | 2267 | 10 | GMPSYCTGYR  | Consensus (ann/smm) | 0.93 |
| 401 | HLA-A*33:03 | orf1ab polyprotein | 716  | 724  | 9  | LYRKCVKSR   | netmhcpa_el         | 0.93 |
| 402 | HLA-A*33:03 | orf1ab polyprotein | 4029 | 4038 | 10 | MQTMLFTMLR  | netmhcpa_el         | 0.93 |

|     |             |                    |      |      |    |             |                     |      |
|-----|-------------|--------------------|------|------|----|-------------|---------------------|------|
| 403 | HLA-A*02:06 | orf1ab polyprotein | 2372 | 2381 | 10 | VQMAPISAMV  | Consensus (ann/smm) | 0.92 |
| 404 | HLA-A*02:06 | orf1ab polyprotein | 3774 | 3782 | 9  | NTLQCIMLV   | Consensus (ann/smm) | 0.92 |
| 405 | HLA-A*03:01 | orf1ab polyprotein | 3227 | 3236 | 10 | REAACCHLAK  | Consensus (ann/smm) | 0.92 |
| 406 | HLA-A*11:01 | orf1ab polyprotein | 3342 | 3351 | 10 | GHSMQNCVLK  | Consensus (ann/smm) | 0.92 |
| 407 | HLA-A*24:02 | orf1ab polyprotein | 2778 | 2787 | 10 | LVFLFVAEIF  | Consensus (ann/smm) | 0.92 |
| 408 | HLA-A*26:01 | orf1ab polyprotein | 5679 | 5687 | 9  | YVFCTVNAL   | Consensus (ann/smm) | 0.92 |
| 409 | HLA-A*31:01 | orf1ab polyprotein | 4323 | 4331 | 9  | GASCCLYCR   | Consensus (ann/smm) | 0.92 |
| 410 | HLA-A*31:01 | orf1ab polyprotein | 4892 | 4900 | 9  | KSAGFPFNK   | Consensus (ann/smm) | 0.92 |
| 411 | HLA-A*31:01 | orf1ab polyprotein | 5272 | 5281 | 10 | VFHLYLQYIR  | Consensus (ann/smm) | 0.92 |
| 412 | HLA-A*33:03 | orf1ab polyprotein | 1172 | 1180 | 9  | NVYLAVFDK   | netmhcpa_el         | 0.92 |
| 413 | HLA-A*33:03 | orf1ab polyprotein | 2167 | 2175 | 9  | NYMPYFFTL   | netmhcpa_el         | 0.92 |
| 414 | HLA-A*33:03 | orf1ab polyprotein | 4241 | 4251 | 11 | MVLGSLAATVR | netmhcpa_el         | 0.92 |
| 415 | HLA-A*02:01 | orf1ab polyprotein | 3098 | 3107 | 10 | YSFLPGVYSV  | Consensus (ann/smm) | 0.91 |
| 416 | HLA-A*02:01 | orf1ab polyprotein | 2358 | 2367 | 10 | FISNSWLMWL  | Consensus (ann/smm) | 0.91 |
| 417 | HLA-A*02:01 | orf1ab polyprotein | 6659 | 6668 | 10 | SQMEIDFLEL  | Consensus (ann/smm) | 0.91 |
| 418 | HLA-A*02:06 | orf1ab polyprotein | 619  | 627  | 9  | TVYEKLPV    | Consensus (ann/smm) | 0.91 |
| 419 | HLA-A*11:01 | orf1ab polyprotein | 6384 | 6394 | 11 | VVSDIDYVPLK | Consensus (ann/smm) | 0.91 |
| 420 | HLA-A*11:01 | orf1ab polyprotein | 1398 | 1407 | 10 | IVSTIQRKYK  | Consensus (ann/smm) | 0.91 |
| 421 | HLA-A*26:01 | orf1ab polyprotein | 182  | 190  | 9  | YTRYVDNNF   | Consensus (ann/smm) | 0.91 |
| 422 | HLA-A*26:01 | orf1ab polyprotein | 501  | 509  | 9  | QIVESCGNF   | Consensus (ann/smm) | 0.91 |
| 423 | HLA-A*31:01 | orf1ab polyprotein | 2002 | 2011 | 10 | TYKPNTWCIR  | Consensus (ann/smm) | 0.91 |
| 424 | HLA-A*01:01 | orf1ab polyprotein | 5251 | 5259 | 9  | FVSLAIDAY   | Consensus (ann/smm) | 0.9  |
| 425 | HLA-A*01:01 | orf1ab polyprotein | 2099 | 2107 | 9  | YVDNSSLTI   | Consensus (ann/smm) | 0.9  |
| 426 | HLA-A*01:01 | orf1ab polyprotein | 3373 | 3381 | 9  | QTFSVLACY   | Consensus (ann/smm) | 0.9  |
| 427 | HLA-A*01:01 | orf1ab polyprotein | 4164 | 4172 | 9  | TDDNALAYY   | Consensus (ann/smm) | 0.9  |
| 428 | HLA-A*01:01 | orf1ab polyprotein | 6476 | 6484 | 9  | VSIINNTVY   | Consensus (ann/smm) | 0.9  |
| 429 | HLA-A*01:01 | orf1ab polyprotein | 2976 | 2983 | 8  | VTTFDSEY    | Consensus (ann/smm) | 0.9  |
| 430 | HLA-A*01:01 | orf1ab polyprotein | 349  | 359  | 11 | LTKEGATTCGY | Consensus (ann/smm) | 0.9  |
| 431 | HLA-A*01:01 | orf1ab polyprotein | 1320 | 1329 | 10 | VPTDNYITTY  | Consensus (ann/smm) | 0.9  |

|     |             |                    |      |      |    |             |                                        |      |
|-----|-------------|--------------------|------|------|----|-------------|----------------------------------------|------|
| 432 | HLA-A*02:01 | orf1ab polyprotein | 1010 | 1020 | 11 | PQLEMELTPVV | Consensus (ann/smm)                    | 0.9  |
| 433 | HLA-A*02:01 | orf1ab polyprotein | 1387 | 1395 | 9  | KLMPVCVET   | Consensus (ann/comblib_sidney2008/smm) | 0.9  |
| 434 | HLA-A*02:01 | orf1ab polyprotein | 2347 | 2355 | 9  | MQLFFSYFA   | Consensus (ann/comblib_sidney2008/smm) | 0.9  |
| 435 | HLA-A*02:01 | orf1ab polyprotein | 5469 | 5478 | 10 | FKLSYGIATV  | Consensus (ann/smm)                    | 0.9  |
| 436 | HLA-A*02:06 | orf1ab polyprotein | 2364 | 2372 | 9  | LMWLIINLV   | Consensus (ann/smm)                    | 0.9  |
| 437 | HLA-A*02:06 | orf1ab polyprotein | 2373 | 2381 | 9  | QMAPISAMV   | Consensus (ann/smm)                    | 0.9  |
| 438 | HLA-A*02:06 | orf1ab polyprotein | 3677 | 3686 | 10 | FKLKDCVMYA  | Consensus (ann/smm)                    | 0.9  |
| 439 | HLA-A*02:06 | orf1ab polyprotein | 3916 | 3925 | 10 | SVLLSMQGAV  | Consensus (ann/smm)                    | 0.9  |
| 440 | HLA-A*11:01 | orf1ab polyprotein | 458  | 468  | 11 | KVNINIVGDFK | Consensus (ann/smm)                    | 0.9  |
| 441 | HLA-A*11:01 | orf1ab polyprotein | 2385 | 2395 | 11 | IFFASFYVWVK | Consensus (ann/smm)                    | 0.9  |
| 442 | HLA-A*11:01 | orf1ab polyprotein | 5133 | 5143 | 11 | FVNEFYAYLRK | Consensus (ann/smm)                    | 0.9  |
| 443 | HLA-A*11:01 | orf1ab polyprotein | 6669 | 6678 | 10 | AMDEFIERYK  | Consensus (ann/smm)                    | 0.9  |
| 444 | HLA-A*11:01 | orf1ab polyprotein | 6760 | 6768 | 9  | SQDLSVVSK   | Consensus (ann/smm)                    | 0.9  |
| 445 | HLA-A*24:02 | orf1ab polyprotein | 3127 | 3135 | 9  | QWMVMFTPL   | Consensus (ann/smm)                    | 0.9  |
| 446 | HLA-A*24:02 | orf1ab polyprotein | 4704 | 4713 | 10 | NFNVLSTVF   | Consensus (ann/smm)                    | 0.9  |
| 447 | HLA-A*24:02 | orf1ab polyprotein | 1813 | 1821 | 9  | QYELKHGTF   | Consensus (ann/smm)                    | 0.9  |
| 448 | HLA-A*24:02 | orf1ab polyprotein | 2168 | 2176 | 9  | YMPYFFLL    | Consensus (ann/smm)                    | 0.9  |
| 449 | HLA-A*24:02 | orf1ab polyprotein | 2379 | 2387 | 9  | AMVRMYIFF   | Consensus (ann/smm)                    | 0.9  |
| 450 | HLA-A*24:02 | orf1ab polyprotein | 3788 | 3796 | 9  | YFCTCYFGL   | Consensus (ann/smm)                    | 0.9  |
| 451 | HLA-A*24:02 | orf1ab polyprotein | 5179 | 5187 | 9  | YYQNNVFMS   | Consensus (ann/smm)                    | 0.9  |
| 452 | HLA-A*24:02 | orf1ab polyprotein | 4228 | 4237 | 10 | LYFIKGLNNL  | Consensus (ann/smm)                    | 0.9  |
| 453 | HLA-A*26:01 | orf1ab polyprotein | 5170 | 5179 | 10 | SIKNFKSVLY  | Consensus (ann/smm)                    | 0.9  |
| 454 | HLA-A*31:01 | orf1ab polyprotein | 808  | 816  | 9  | VTNNTFTLK   | Consensus (ann/smm)                    | 0.9  |
| 455 | HLA-A*31:01 | orf1ab polyprotein | 1555 | 1563 | 9  | NLKTLLSLR   | Consensus (ann/smm)                    | 0.9  |
| 456 | HLA-A*31:01 | orf1ab polyprotein | 4433 | 4442 | 10 | KVAGFAKFLK  | Consensus (ann/smm)                    | 0.9  |
| 457 | HLA-A*33:03 | orf1ab polyprotein | 4170 | 4179 | 10 | AYYNTTKGGR  | netmhcpa_el                            | 0.9  |
| 458 | HLA-A*33:03 | orf1ab polyprotein | 5533 | 5542 | 10 | VVYRGTTYK   | netmhcpa_el                            | 0.9  |
| 459 | HLA-A*02:01 | orf1ab polyprotein | 5290 | 5299 | 10 | HMLDMYSVML  | Consensus (ann/smm)                    | 0.89 |
| 460 | HLA-A*02:01 | orf1ab polyprotein | 1011 | 1020 | 10 | QLEMELTPVV  | Consensus (ann/smm)                    | 0.89 |

|     |             |                    |      |      |    |             |                     |      |
|-----|-------------|--------------------|------|------|----|-------------|---------------------|------|
| 461 | HLA-A*11:01 | orf1ab polyprotein | 6055 | 6064 | 10 | NTDFSRVSAK  | Consensus (ann/smm) | 0.89 |
| 462 | HLA-A*11:01 | orf1ab polyprotein | 6504 | 6512 | 9  | NVAFELWAK   | Consensus (ann/smm) | 0.89 |
| 463 | HLA-A*11:01 | orf1ab polyprotein | 1090 | 1098 | 9  | YIATNGPLK   | Consensus (ann/smm) | 0.89 |
| 464 | HLA-A*11:01 | orf1ab polyprotein | 4168 | 4176 | 9  | ALAYYNTTK   | Consensus (ann/smm) | 0.89 |
| 465 | HLA-A*11:01 | orf1ab polyprotein | 4673 | 4681 | 9  | KLFDRYFKY   | Consensus (ann/smm) | 0.89 |
| 466 | HLA-A*24:02 | orf1ab polyprotein | 3423 | 3431 | 9  | CYMHHMELP   | Consensus (ann/smm) | 0.89 |
| 467 | HLA-A*24:02 | orf1ab polyprotein | 4806 | 4814 | 9  | NFNKDFYDF   | Consensus (ann/smm) | 0.89 |
| 468 | HLA-A*31:01 | orf1ab polyprotein | 5034 | 5043 | 10 | HTTCCSLSHR  | Consensus (ann/smm) | 0.89 |
| 469 | HLA-A*31:01 | orf1ab polyprotein | 6623 | 6632 | 10 | AVKTQFNYYK  | Consensus (ann/smm) | 0.89 |
| 470 | HLA-A*31:01 | orf1ab polyprotein | 5656 | 5663 | 8  | RIIPARAR    | ann                 | 0.89 |
| 471 | HLA-A*33:03 | orf1ab polyprotein | 5708 | 5716 | 9  | LSVVNARLR   | netmhcpa_el         | 0.89 |
| 472 | HLA-A*33:03 | orf1ab polyprotein | 2808 | 2818 | 11 | GYKAIDGGVTR | netmhcpa_el         | 0.89 |
| 473 | HLA-A*33:03 | orf1ab polyprotein | 5296 | 5306 | 11 | SVMLTNDNTSR | netmhcpa_el         | 0.89 |
| 474 | HLA-A*33:03 | orf1ab polyprotein | 1024 | 1033 | 10 | EVNSFSGYLK  | netmhcpa_el         | 0.89 |
| 475 | HLA-A*33:03 | orf1ab polyprotein | 4141 | 4150 | 10 | NNELSPVALR  | netmhcpa_el         | 0.89 |
| 476 | HLA-A*33:03 | orf1ab polyprotein | 6949 | 6958 | 10 | TYICGFIQQK  | netmhcpa_el         | 0.89 |
| 477 | HLA-A*01:01 | orf1ab polyprotein | 6177 | 6185 | 9  | NLQSNHDLY   | Consensus (ann/smm) | 0.88 |
| 478 | HLA-A*01:01 | orf1ab polyprotein | 5771 | 5781 | 11 | EIVDTVSAVY  | Consensus (ann/smm) | 0.88 |
| 479 | HLA-A*03:01 | orf1ab polyprotein | 1310 | 1319 | 10 | TEMLAKALRK  | Consensus (ann/smm) | 0.88 |
| 480 | HLA-A*03:01 | orf1ab polyprotein | 1419 | 1428 | 10 | GARFYFYTSK  | Consensus (ann/smm) | 0.88 |
| 481 | HLA-A*03:01 | orf1ab polyprotein | 5118 | 5127 | 10 | RLYECLYRNR  | Consensus (ann/smm) | 0.88 |
| 482 | HLA-A*03:01 | orf1ab polyprotein | 5388 | 5397 | 10 | YLGGMSSYCK  | Consensus (ann/smm) | 0.88 |
| 483 | HLA-A*03:01 | orf1ab polyprotein | 6292 | 6301 | 10 | FYSYATHSDK  | Consensus (ann/smm) | 0.88 |
| 484 | HLA-A*11:01 | orf1ab polyprotein | 3646 | 3654 | 9  | TVAYFNMVY   | Consensus (ann/smm) | 0.88 |
| 485 | HLA-A*24:02 | orf1ab polyprotein | 2357 | 2365 | 9  | HFISNSWLM   | Consensus (ann/smm) | 0.88 |
| 486 | HLA-A*24:02 | orf1ab polyprotein | 3062 | 3072 | 11 | YYFMRFRRAFG | Consensus (ann/smm) | 0.88 |
| 487 | HLA-A*26:01 | orf1ab polyprotein | 1055 | 1064 | 10 | TVVVNAANVY  | Consensus (ann/smm) | 0.88 |
| 488 | HLA-A*26:01 | orf1ab polyprotein | 3096 | 3105 | 10 | PVYSFLPGVY  | Consensus (ann/smm) | 0.88 |
| 489 | HLA-A*26:01 | orf1ab polyprotein | 4914 | 4922 | 9  | EDQDALFAY   | Consensus (ann/smm) | 0.88 |

|     |             |                    |      |      |    |             |                     |      |
|-----|-------------|--------------------|------|------|----|-------------|---------------------|------|
| 490 | HLA-A*31:01 | orf1ab polyprotein | 3220 | 3227 | 8  | AMDTTSYR    | ann                 | 0.88 |
| 491 | HLA-A*33:03 | orf1ab polyprotein | 199  | 207  | 9  | ECIKDLLAR   | netmhcpa_el         | 0.88 |
| 492 | HLA-A*33:03 | orf1ab polyprotein | 537  | 545  | 9  | ASEAARVVR   | netmhcpa_el         | 0.88 |
| 493 | HLA-A*33:03 | orf1ab polyprotein | 2708 | 2716 | 9  | NIALIWNVK   | netmhcpa_el         | 0.88 |
| 494 | HLA-A*33:03 | orf1ab polyprotein | 2852 | 2860 | 9  | PLIAAVITR   | netmhcpa_el         | 0.88 |
| 495 | HLA-A*33:03 | orf1ab polyprotein | 1153 | 1163 | 11 | IFGADPIHSLR | netmhcpa_el         | 0.88 |
| 496 | HLA-A*33:03 | orf1ab polyprotein | 4393 | 4402 | 10 | SADAQSFLNR  | netmhcpa_el         | 0.88 |
| 497 | HLA-A*33:03 | orf1ab polyprotein | 6808 | 6817 | 10 | AMPNLYKMQR  | netmhcpa_el         | 0.88 |
| 498 | HLA-A*03:01 | orf1ab polyprotein | 1116 | 1124 | 9  | HVVGPVNVK   | Consensus (ann/smm) | 0.87 |
| 499 | HLA-A*03:01 | orf1ab polyprotein | 4632 | 4641 | 10 | LLMPILTLTR  | Consensus (ann/smm) | 0.87 |
| 500 | HLA-A*11:01 | orf1ab polyprotein | 482  | 492  | 11 | ASTSAFVETVK | Consensus (ann/smm) | 0.87 |
| 501 | HLA-A*11:01 | orf1ab polyprotein | 3893 | 3902 | 10 | QLHNDILLAK  | Consensus (ann/smm) | 0.87 |
| 502 | HLA-A*11:01 | orf1ab polyprotein | 848  | 856  | 9  | RIDKVLNEK   | Consensus (ann/smm) | 0.87 |
| 503 | HLA-A*26:01 | orf1ab polyprotein | 3803 | 3811 | 9  | YFRLTLGVY   | Consensus (ann/smm) | 0.87 |
| 504 | HLA-A*26:01 | orf1ab polyprotein | 4082 | 4091 | 10 | NTCDGTTFTY  | Consensus (ann/smm) | 0.87 |
| 505 | HLA-A*31:01 | orf1ab polyprotein | 2520 | 2528 | 9  | HFVNLNLR    | Consensus (ann/smm) | 0.87 |
| 506 | HLA-A*31:01 | orf1ab polyprotein | 2630 | 2638 | 9  | LSTFISAAR   | Consensus (ann/smm) | 0.87 |
| 507 | HLA-A*31:01 | orf1ab polyprotein | 3206 | 3215 | 10 | RYLALYNKYK  | Consensus (ann/smm) | 0.87 |
| 508 | HLA-A*31:01 | orf1ab polyprotein | 5884 | 5891 | 8  | RFNVAITR    | ann                 | 0.87 |
| 509 | HLA-A*33:03 | orf1ab polyprotein | 2389 | 2397 | 9  | SFYVWKSYS   | netmhcpa_el         | 0.87 |
| 510 | HLA-A*33:03 | orf1ab polyprotein | 2753 | 2761 | 9  | VVTTKIALK   | netmhcpa_el         | 0.87 |
| 511 | HLA-A*33:03 | orf1ab polyprotein | 3690 | 3698 | 9  | VLLILMTAR   | netmhcpa_el         | 0.87 |
| 512 | HLA-A*01:01 | orf1ab polyprotein | 5071 | 5081 | 11 | GTSSGDATTAY | Consensus (ann/smm) | 0.86 |
| 513 | HLA-A*01:01 | orf1ab polyprotein | 4162 | 4171 | 10 | ACTDDNALAY  | Consensus (ann/smm) | 0.86 |
| 514 | HLA-A*02:01 | orf1ab polyprotein | 3838 | 3847 | 10 | FKLNIKLLGV  | Consensus (ann/smm) | 0.86 |
| 515 | HLA-A*03:01 | orf1ab polyprotein | 1660 | 1668 | 9  | QVNGLSIK    | Consensus (ann/smm) | 0.86 |
| 516 | HLA-A*03:01 | orf1ab polyprotein | 2919 | 2928 | 10 | CTIFKDASGK  | Consensus (ann/smm) | 0.86 |
| 517 | HLA-A*11:01 | orf1ab polyprotein | 6456 | 6464 | 9  | NVAFNVVVK   | Consensus (ann/smm) | 0.86 |
| 518 | HLA-A*26:01 | orf1ab polyprotein | 83   | 92   | 10 | HVMVELVAEL  | Consensus (ann/smm) | 0.86 |

|     |             |                    |      |      |    |              |                     |      |
|-----|-------------|--------------------|------|------|----|--------------|---------------------|------|
| 519 | HLA-A*26:01 | orf1ab polyprotein | 3366 | 3375 | 10 | FVRIQPGQTF   | Consensus (ann/smm) | 0.86 |
| 520 | HLA-A*26:01 | orf1ab polyprotein | 1461 | 1469 | 9  | EAARYMRS�    | Consensus (ann/smm) | 0.86 |
| 521 | HLA-A*26:01 | orf1ab polyprotein | 5357 | 5365 | 9  | HVISTSHKL    | Consensus (ann/smm) | 0.86 |
| 522 | HLA-A*33:03 | orf1ab polyprotein | 283  | 291  | 9  | TIQPRVEKK    | netmhcpa_n_el       | 0.86 |
| 523 | HLA-A*33:03 | orf1ab polyprotein | 489  | 497  | 9  | ETVKGLDYK    | netmhcpa_n_el       | 0.86 |
| 524 | HLA-A*33:03 | orf1ab polyprotein | 2976 | 2985 | 10 | VTTFDSEYCR   | netmhcpa_n_el       | 0.86 |
| 525 | HLA-A*33:03 | orf1ab polyprotein | 5470 | 5479 | 10 | KLSYGIATVR   | netmhcpa_n_el       | 0.86 |
| 526 | HLA-A*02:01 | orf1ab polyprotein | 1247 | 1257 | 11 | KFLTENLLLYI  | Consensus (ann/smm) | 0.85 |
| 527 | HLA-A*02:01 | orf1ab polyprotein | 3122 | 3131 | 10 | FLAHIQWMVM   | Consensus (ann/smm) | 0.85 |
| 528 | HLA-A*02:01 | orf1ab polyprotein | 3861 | 3870 | 10 | KMSDVKCTSV   | Consensus (ann/smm) | 0.85 |
| 529 | HLA-A*02:01 | orf1ab polyprotein | 4265 | 4274 | 10 | TVLSFCFAFAV  | Consensus (ann/smm) | 0.85 |
| 530 | HLA-A*02:06 | orf1ab polyprotein | 2372 | 2380 | 9  | VQMAPISAM    | Consensus (ann/smm) | 0.85 |
| 531 | HLA-A*02:06 | orf1ab polyprotein | 6199 | 6207 | 9  | AIMTRCLAV    | Consensus (ann/smm) | 0.85 |
| 532 | HLA-A*03:01 | orf1ab polyprotein | 116  | 124  | 9  | VAYRKVLLR    | Consensus (ann/smm) | 0.85 |
| 533 | HLA-A*11:01 | orf1ab polyprotein | 4815 | 4822 | 8  | AVSKGFFK     | Consensus (ann/smm) | 0.85 |
| 534 | HLA-A*11:01 | orf1ab polyprotein | 1309 | 1319 | 11 | TTEMLAKALRK  | Consensus (ann/smm) | 0.85 |
| 535 | HLA-A*11:01 | orf1ab polyprotein | 1827 | 1837 | 11 | YTGNYQCQGHYK | Consensus (ann/smm) | 0.85 |
| 536 | HLA-A*24:02 | orf1ab polyprotein | 1645 | 1653 | 9  | RYMSALNHT    | Consensus (ann/smm) | 0.85 |
| 537 | HLA-A*26:01 | orf1ab polyprotein | 6352 | 6361 | 10 | HTPAFDKSAF   | Consensus (ann/smm) | 0.85 |
| 538 | HLA-A*33:03 | orf1ab polyprotein | 1721 | 1729 | 9  | TVGELGDVR    | netmhcpa_n_el       | 0.85 |
| 539 | HLA-A*33:03 | orf1ab polyprotein | 3060 | 3069 | 10 | LAYYFMRFR    | netmhcpa_n_el       | 0.85 |
| 540 | HLA-A*01:01 | orf1ab polyprotein | 4855 | 4863 | 9  | MCDIRQLLF    | Consensus (ann/smm) | 0.84 |
| 541 | HLA-A*02:01 | orf1ab polyprotein | 806  | 815  | 10 | MMVTNNTFTL   | Consensus (ann/smm) | 0.84 |
| 542 | HLA-A*03:01 | orf1ab polyprotein | 282  | 290  | 9  | KTIQPRVEK    | Consensus (ann/smm) | 0.84 |
| 543 | HLA-A*03:01 | orf1ab polyprotein | 5098 | 5106 | 9  | ALLSTDGNK    | Consensus (ann/smm) | 0.84 |
| 544 | HLA-A*03:01 | orf1ab polyprotein | 3059 | 3068 | 10 | CLAYYFMRFR   | Consensus (ann/smm) | 0.84 |
| 545 | HLA-A*11:01 | orf1ab polyprotein | 2789 | 2798 | 10 | LITPVHVMSK   | Consensus (ann/smm) | 0.84 |
| 546 | HLA-A*11:01 | orf1ab polyprotein | 3356 | 3365 | 10 | TANPKTPKYK   | Consensus (ann/smm) | 0.84 |
| 547 | HLA-A*11:01 | orf1ab polyprotein | 4814 | 4822 | 9  | FAVSKGFFK    | Consensus (ann/smm) | 0.84 |

|     |             |                    |      |      |    |             |                     |      |
|-----|-------------|--------------------|------|------|----|-------------|---------------------|------|
| 548 | HLA-A*11:01 | orf1ab polyprotein | 4417 | 4425 | 9  | GTSTDVVYR   | Consensus (ann/smm) | 0.84 |
| 549 | HLA-A*24:02 | orf1ab polyprotein | 4849 | 4858 | 10 | RYNLPTMCDI  | Consensus (ann/smm) | 0.84 |
| 550 | HLA-A*33:03 | orf1ab polyprotein | 7039 | 7047 | 9  | SYSLFDMSK   | netmhcpa_el         | 0.84 |
| 551 | HLA-A*33:03 | orf1ab polyprotein | 2865 | 2875 | 11 | VVPGLPGTILR | netmhcpa_el         | 0.84 |
| 552 | HLA-A*33:03 | orf1ab polyprotein | 3565 | 3574 | 10 | GVTFQSAVKR  | netmhcpa_el         | 0.84 |
| 553 | HLA-A*01:01 | orf1ab polyprotein | 3116 | 3124 | 9  | LTNDVSFLA   | Consensus (ann/smm) | 0.83 |
| 554 | HLA-A*01:01 | orf1ab polyprotein | 5859 | 5867 | 9  | SSQGSEYDY   | Consensus (ann/smm) | 0.83 |
| 555 | HLA-A*02:06 | orf1ab polyprotein | 2363 | 2371 | 9  | WLMWLIINL   | Consensus (ann/smm) | 0.83 |
| 556 | HLA-A*02:06 | orf1ab polyprotein | 6246 | 6254 | 9  | LLADKFPVL   | Consensus (ann/smm) | 0.83 |
| 557 | HLA-A*02:06 | orf1ab polyprotein | 6851 | 6859 | 9  | YLNTLTAV    | Consensus (ann/smm) | 0.83 |
| 558 | HLA-A*02:06 | orf1ab polyprotein | 2167 | 2175 | 9  | NYMPYFFTL   | Consensus (ann/smm) | 0.83 |
| 559 | HLA-A*11:01 | orf1ab polyprotein | 1295 | 1304 | 10 | VLTAVVIPTK  | Consensus (ann/smm) | 0.83 |
| 560 | HLA-A*11:01 | orf1ab polyprotein | 1681 | 1689 | 9  | LTLQQLK     | Consensus (ann/smm) | 0.83 |
| 561 | HLA-A*11:01 | orf1ab polyprotein | 1116 | 1124 | 9  | HVVGPNVVK   | Consensus (ann/smm) | 0.83 |
| 562 | HLA-A*24:02 | orf1ab polyprotein | 3148 | 3156 | 9  | ISTKHFYWF   | Consensus (ann/smm) | 0.83 |
| 563 | HLA-A*24:02 | orf1ab polyprotein | 3174 | 3183 | 10 | TFEEAALCTF  | Consensus (ann/smm) | 0.83 |
| 564 | HLA-A*26:01 | orf1ab polyprotein | 4840 | 4848 | 9  | AAISDYDYY   | Consensus (ann/smm) | 0.83 |
| 565 | HLA-A*26:01 | orf1ab polyprotein | 4505 | 4514 | 10 | HISRQLTKY   | Consensus (ann/smm) | 0.83 |
| 566 | HLA-A*31:01 | orf1ab polyprotein | 4673 | 4680 | 8  | KLFDYFK     | ann                 | 0.83 |
| 567 | HLA-A*31:01 | orf1ab polyprotein | 2507 | 2515 | 9  | KAGQKYER    | Consensus (ann/smm) | 0.83 |
| 568 | HLA-A*33:03 | orf1ab polyprotein | 5804 | 5814 | 11 | ITHDVSSAINR | netmhcpa_el         | 0.83 |
| 569 | HLA-A*01:01 | orf1ab polyprotein | 2799 | 2807 | 9  | HTDFSSEII   | Consensus (ann/smm) | 0.82 |
| 570 | HLA-A*01:01 | orf1ab polyprotein | 1787 | 1796 | 10 | CTCGKQATKY  | Consensus (ann/smm) | 0.82 |
| 571 | HLA-A*02:01 | orf1ab polyprotein | 6749 | 6758 | 10 | LLDDFVEII   | Consensus (ann/smm) | 0.82 |
| 572 | HLA-A*02:06 | orf1ab polyprotein | 1444 | 1453 | 10 | TLVTMPLGYV  | Consensus (ann/smm) | 0.82 |
| 573 | HLA-A*02:06 | orf1ab polyprotein | 4180 | 4188 | 9  | FVLALLSDL   | Consensus (ann/smm) | 0.82 |
| 574 | HLA-A*03:01 | orf1ab polyprotein | 3207 | 3215 | 9  | YLALYNKYK   | Consensus (ann/smm) | 0.82 |
| 575 | HLA-A*03:01 | orf1ab polyprotein | 4183 | 4192 | 10 | ALLSDLQDLK  | Consensus (ann/smm) | 0.82 |
| 576 | HLA-A*11:01 | orf1ab polyprotein | 1296 | 1305 | 10 | LTAVVIPTKK  | Consensus (ann/smm) | 0.82 |

|     |             |                    |      |      |    |             |                     |      |
|-----|-------------|--------------------|------|------|----|-------------|---------------------|------|
| 577 | HLA-A*11:01 | orf1ab polyprotein | 3391 | 3400 | 10 | CAMRPNFTIK  | Consensus (ann/smm) | 0.82 |
| 578 | HLA-A*11:01 | orf1ab polyprotein | 6195 | 6203 | 9  | ASCDAIMTR   | Consensus (ann/smm) | 0.82 |
| 579 | HLA-A*11:01 | orf1ab polyprotein | 5980 | 5989 | 10 | ISMIMGFKMNY | Consensus (ann/smm) | 0.82 |
| 580 | HLA-A*24:02 | orf1ab polyprotein | 5178 | 5186 | 9  | LYYQNNVFM   | Consensus (ann/smm) | 0.82 |
| 581 | HLA-A*24:02 | orf1ab polyprotein | 3718 | 3727 | 10 | VYKVYYGNAL  | Consensus (ann/smm) | 0.82 |
| 582 | HLA-A*24:02 | orf1ab polyprotein | 3802 | 3811 | 10 | RYFRLTLGVY  | Consensus (ann/smm) | 0.82 |
| 583 | HLA-A*26:01 | orf1ab polyprotein | 3076 | 3084 | 9  | HVVAFNLL    | Consensus (ann/smm) | 0.82 |
| 584 | HLA-A*31:01 | orf1ab polyprotein | 2176 | 2184 | 9  | LLQLCTFTR   | Consensus (ann/smm) | 0.82 |
| 585 | HLA-A*33:03 | orf1ab polyprotein | 3567 | 3574 | 8  | TFQSAVKR    | netmhcpa_el         | 0.82 |
| 586 | HLA-A*33:03 | orf1ab polyprotein | 2411 | 2420 | 10 | MCYKRNRRATR | netmhcpa_el         | 0.82 |
| 587 | HLA-A*33:03 | orf1ab polyprotein | 2982 | 2991 | 10 | EYCRHGTCER  | netmhcpa_el         | 0.82 |
| 588 | HLA-A*33:03 | orf1ab polyprotein | 5745 | 5754 | 10 | YFNSVCRLMK  | netmhcpa_el         | 0.82 |
| 589 | HLA-A*02:01 | orf1ab polyprotein | 1031 | 1040 | 10 | YLKLTDNVYI  | Consensus (ann/smm) | 0.81 |
| 590 | HLA-A*02:01 | orf1ab polyprotein | 2323 | 2332 | 10 | LVAEWFLAYI  | Consensus (ann/smm) | 0.81 |
| 591 | HLA-A*02:06 | orf1ab polyprotein | 2225 | 2234 | 10 | KLINIIWFL   | Consensus (ann/smm) | 0.81 |
| 592 | HLA-A*02:06 | orf1ab polyprotein | 6803 | 6812 | 10 | WQPGVAMPNL  | Consensus (ann/smm) | 0.81 |
| 593 | HLA-A*03:01 | orf1ab polyprotein | 1646 | 1654 | 9  | YMSALNHTK   | Consensus (ann/smm) | 0.81 |
| 594 | HLA-A*03:01 | orf1ab polyprotein | 3878 | 3886 | 9  | QLRVESSEK   | Consensus (ann/smm) | 0.81 |
| 595 | HLA-A*03:01 | orf1ab polyprotein | 1647 | 1655 | 9  | MSALNHTKK   | Consensus (ann/smm) | 0.81 |
| 596 | HLA-A*03:01 | orf1ab polyprotein | 3343 | 3351 | 9  | HSMQNCVLK   | Consensus (ann/smm) | 0.81 |
| 597 | HLA-A*11:01 | orf1ab polyprotein | 6623 | 6633 | 11 | AVKTQFNYYKK | Consensus (ann/smm) | 0.81 |
| 598 | HLA-A*11:01 | orf1ab polyprotein | 1419 | 1428 | 10 | GARFYFYTSK  | Consensus (ann/smm) | 0.81 |
| 599 | HLA-A*11:01 | orf1ab polyprotein | 1647 | 1655 | 9  | MSALNHTKK   | Consensus (ann/smm) | 0.81 |
| 600 | HLA-A*11:01 | orf1ab polyprotein | 4957 | 4966 | 10 | TMTNRQFHQK  | Consensus (ann/smm) | 0.81 |
| 601 | HLA-A*11:01 | orf1ab polyprotein | 2749 | 2757 | 9  | QVVNVVTTK   | Consensus (ann/smm) | 0.81 |
| 602 | HLA-A*11:01 | orf1ab polyprotein | 5101 | 5110 | 10 | STDGNKIADK  | Consensus (ann/smm) | 0.81 |
| 603 | HLA-A*11:01 | orf1ab polyprotein | 6091 | 6100 | 10 | IVQMLSDTLK  | Consensus (ann/smm) | 0.81 |
| 604 | HLA-A*24:02 | orf1ab polyprotein | 6301 | 6309 | 9  | KFTDGVCLF   | Consensus (ann/smm) | 0.81 |
| 605 | HLA-A*24:02 | orf1ab polyprotein | 3114 | 3123 | 10 | FYLTDVVSFL  | Consensus (ann/smm) | 0.81 |

|     |             |                    |      |      |    |             |                                        |      |
|-----|-------------|--------------------|------|------|----|-------------|----------------------------------------|------|
| 606 | HLA-A*26:01 | orf1ab polyprotein | 2339 | 2347 | 9  | YVLGLAAIM   | Consensus (ann/smm)                    | 0.81 |
| 607 | HLA-A*33:03 | orf1ab polyprotein | 237  | 244  | 8  | EIAWYTER    | netmhcpa_el                            | 0.81 |
| 608 | HLA-A*33:03 | orf1ab polyprotein | 3652 | 3662 | 11 | MVYMPASWVMR | netmhcpa_el                            | 0.81 |
| 609 | HLA-A*33:03 | orf1ab polyprotein | 2629 | 2638 | 10 | VLSTFISAAR  | netmhcpa_el                            | 0.81 |
| 610 | HLA-A*01:01 | orf1ab polyprotein | 1503 | 1511 | 9  | ETISLAGSY   | Consensus (ann/smm)                    | 0.8  |
| 611 | HLA-A*02:01 | orf1ab polyprotein | 4630 | 4639 | 10 | YSLLPILTL   | Consensus (ann/smm)                    | 0.8  |
| 612 | HLA-A*02:01 | orf1ab polyprotein | 3839 | 3847 | 9  | KLNIKLLGV   | Consensus (ann/comblib_sidney2008/smm) | 0.8  |
| 613 | HLA-A*02:01 | orf1ab polyprotein | 4632 | 4640 | 9  | LLMPILTLT   | Consensus (ann/comblib_sidney2008/smm) | 0.8  |
| 614 | HLA-A*02:01 | orf1ab polyprotein | 6750 | 6758 | 9  | LLDDFVEII   | Consensus (ann/comblib_sidney2008/smm) | 0.8  |
| 615 | HLA-A*02:06 | orf1ab polyprotein | 2358 | 2367 | 10 | FISNSWLMWL  | Consensus (ann/smm)                    | 0.8  |
| 616 | HLA-A*02:06 | orf1ab polyprotein | 1148 | 1156 | 9  | LLSAGIFGA   | Consensus (ann/smm)                    | 0.8  |
| 617 | HLA-A*02:06 | orf1ab polyprotein | 4614 | 4623 | 10 | FIQTTPGSGV  | Consensus (ann/smm)                    | 0.8  |
| 618 | HLA-A*02:06 | orf1ab polyprotein | 5541 | 5550 | 10 | YKLNVDYFV   | Consensus (ann/smm)                    | 0.8  |
| 619 | HLA-A*03:01 | orf1ab polyprotein | 510  | 518  | 9  | KVTKGKAKK   | Consensus (ann/smm)                    | 0.8  |
| 620 | HLA-A*03:01 | orf1ab polyprotein | 3152 | 3162 | 11 | HFYWFFSNYK  | Consensus (ann/smm)                    | 0.8  |
| 621 | HLA-A*03:01 | orf1ab polyprotein | 4011 | 4021 | 11 | QMYKQARSEDK | Consensus (ann/smm)                    | 0.8  |
| 622 | HLA-A*11:01 | orf1ab polyprotein | 3343 | 3353 | 11 | HSMQNCVLLK  | Consensus (ann/smm)                    | 0.8  |
| 623 | HLA-A*11:01 | orf1ab polyprotein | 5408 | 5418 | 11 | CANGQVFGLYK | Consensus (ann/smm)                    | 0.8  |
| 624 | HLA-A*11:01 | orf1ab polyprotein | 5024 | 5033 | 10 | IMASLVLARK  | Consensus (ann/smm)                    | 0.8  |
| 625 | HLA-A*24:02 | orf1ab polyprotein | 3597 | 3605 | 9  | STQWSLFFF   | Consensus (ann/smm)                    | 0.8  |
| 626 | HLA-A*24:02 | orf1ab polyprotein | 4079 | 4089 | 11 | TYKNTCDGTTF | Consensus (ann/smm)                    | 0.8  |
| 627 | HLA-A*24:02 | orf1ab polyprotein | 2338 | 2346 | 9  | FYVLGLAAI   | Consensus (ann/smm)                    | 0.8  |
| 628 | HLA-A*24:02 | orf1ab polyprotein | 1645 | 1654 | 10 | RYMSALNHTK  | Consensus (ann/smm)                    | 0.8  |
| 629 | HLA-A*24:02 | orf1ab polyprotein | 2449 | 2458 | 10 | NWNCVNCDF   | Consensus (ann/smm)                    | 0.8  |
| 630 | HLA-A*24:02 | orf1ab polyprotein | 422  | 432  | 11 | YWVPRASANIG | Consensus (ann/smm)                    | 0.8  |
| 631 | HLA-A*26:01 | orf1ab polyprotein | 4275 | 4283 | 9  | DAAKAYKDY   | Consensus (ann/smm)                    | 0.8  |
| 632 | HLA-A*26:01 | orf1ab polyprotein | 4428 | 4437 | 10 | DIYNDKVAGF  | Consensus (ann/smm)                    | 0.8  |
| 633 | HLA-A*26:01 | orf1ab polyprotein | 4532 | 4541 | 10 | DTLKEILVTY  | Consensus (ann/smm)                    | 0.8  |
| 634 | HLA-A*33:03 | orf1ab polyprotein | 1646 | 1654 | 9  | YMSALNHTK   | netmhcpa_el                            | 0.8  |

|     |             |                    |      |      |    |            |                     |      |
|-----|-------------|--------------------|------|------|----|------------|---------------------|------|
| 635 | HLA-A*33:03 | orf1ab polyprotein | 2941 | 2949 | 9  | GSVAYESLR  | netmhcpa_el         | 0.8  |
| 636 | HLA-A*33:03 | orf1ab polyprotein | 3699 | 3706 | 8  | TVYDDGAR   | netmhcpa_el         | 0.8  |
| 637 | HLA-A*33:03 | orf1ab polyprotein | 1971 | 1980 | 10 | DYKHYPSPFK | netmhcpa_el         | 0.8  |
| 638 | HLA-A*33:03 | orf1ab polyprotein | 3197 | 3206 | 10 | VLLPLTQYNR | netmhcpa_el         | 0.8  |
| 639 | HLA-A*33:03 | orf1ab polyprotein | 3533 | 3542 | 10 | ELLQNGMNGR | netmhcpa_el         | 0.8  |
| 640 | HLA-A*02:06 | orf1ab polyprotein | 6383 | 6391 | 9  | QVVSDIDYV  | Consensus (ann/smm) | 0.79 |
| 641 | HLA-A*02:06 | orf1ab polyprotein | 4698 | 4707 | 10 | CILHCANFNV | Consensus (ann/smm) | 0.79 |
| 642 | HLA-A*02:06 | orf1ab polyprotein | 5147 | 5155 | 9  | MMILSDDAV  | Consensus (ann/smm) | 0.79 |
| 643 | HLA-A*03:01 | orf1ab polyprotein | 7053 | 7061 | 9  | RGTAVMSLK  | Consensus (ann/smm) | 0.79 |
| 644 | HLA-A*03:01 | orf1ab polyprotein | 4905 | 4914 | 10 | RLYDMSYE   | Consensus (ann/smm) | 0.79 |
| 645 | HLA-A*03:01 | orf1ab polyprotein | 6602 | 6610 | 9  | GLQPSVGP   | Consensus (ann/smm) | 0.79 |
| 646 | HLA-A*03:01 | orf1ab polyprotein | 5980 | 5989 | 10 | ISMMGFKMNY | Consensus (ann/smm) | 0.79 |
| 647 | HLA-A*11:01 | orf1ab polyprotein | 614  | 623  | 10 | TNIFGTVYEK | Consensus (ann/smm) | 0.79 |
| 648 | HLA-A*11:01 | orf1ab polyprotein | 6950 | 6958 | 9  | YICGFIQK   | Consensus (ann/smm) | 0.79 |
| 649 | HLA-A*11:01 | orf1ab polyprotein | 1637 | 1645 | 9  | TTDPSFLGR  | Consensus (ann/smm) | 0.79 |
| 650 | HLA-A*24:02 | orf1ab polyprotein | 3106 | 3114 | 9  | SVIYLYLTF  | Consensus (ann/smm) | 0.79 |
| 651 | HLA-A*24:02 | orf1ab polyprotein | 3752 | 3760 | 9  | MFLARGIVF  | Consensus (ann/smm) | 0.79 |
| 652 | HLA-A*26:01 | orf1ab polyprotein | 899  | 908  | 10 | EWSMATYYLF | Consensus (ann/smm) | 0.79 |
| 653 | HLA-A*26:01 | orf1ab polyprotein | 1706 | 1714 | 9  | EAANFCALI  | Consensus (ann/smm) | 0.79 |
| 654 | HLA-A*31:01 | orf1ab polyprotein | 4967 | 4975 | 9  | LLKSIAATR  | Consensus (ann/smm) | 0.79 |
| 655 | HLA-A*31:01 | orf1ab polyprotein | 4008 | 4017 | 10 | AMTQMYQAR  | Consensus (ann/smm) | 0.79 |
| 656 | HLA-A*33:03 | orf1ab polyprotein | 2196 | 2204 | 9  | TTIAKNTVK  | netmhcpa_el         | 0.79 |
| 657 | HLA-A*33:03 | orf1ab polyprotein | 2423 | 2431 | 9  | CTTIVNGVR  | netmhcpa_el         | 0.79 |
| 658 | HLA-A*33:03 | orf1ab polyprotein | 4935 | 4943 | 9  | NLYAISAK   | netmhcpa_el         | 0.79 |
| 659 | HLA-A*33:03 | orf1ab polyprotein | 1554 | 1563 | 10 | DNLKTLLSLR | netmhcpa_el         | 0.79 |
| 660 | HLA-A*01:01 | orf1ab polyprotein | 1874 | 1882 | 9  | TTTIKPVY   | Consensus (ann/smm) | 0.78 |
| 661 | HLA-A*01:01 | orf1ab polyprotein | 3862 | 3870 | 9  | MSDVKCTSV  | Consensus (ann/smm) | 0.78 |
| 662 | HLA-A*01:01 | orf1ab polyprotein | 3645 | 3654 | 10 | ATVAYFNMVY | Consensus (ann/smm) | 0.78 |
| 663 | HLA-A*01:01 | orf1ab polyprotein | 6819 | 6828 | 10 | LLEKCDLQNY | Consensus (ann/smm) | 0.78 |

|     |             |                    |      |      |    |             |                     |      |
|-----|-------------|--------------------|------|------|----|-------------|---------------------|------|
| 664 | HLA-A*02:06 | orf1ab polyprotein | 2883 | 2892 | 10 | HFLPRVFSAV  | Consensus (ann/smm) | 0.78 |
| 665 | HLA-A*03:01 | orf1ab polyprotein | 411  | 419  | 9  | FSYVGCHNK   | Consensus (ann/smm) | 0.78 |
| 666 | HLA-A*03:01 | orf1ab polyprotein | 5645 | 5653 | 9  | ALKYLPIDK   | Consensus (ann/smm) | 0.78 |
| 667 | HLA-A*03:01 | orf1ab polyprotein | 906  | 915  | 10 | YLFDESGEFK  | Consensus (ann/smm) | 0.78 |
| 668 | HLA-A*11:01 | orf1ab polyprotein | 5058 | 5066 | 9  | MVMCGGSLY   | Consensus (ann/smm) | 0.78 |
| 669 | HLA-A*11:01 | orf1ab polyprotein | 2382 | 2391 | 10 | RMYIFFASFY  | Consensus (ann/smm) | 0.78 |
| 670 | HLA-A*11:01 | orf1ab polyprotein | 1712 | 1720 | 9  | ALILAYCNK   | Consensus (ann/smm) | 0.78 |
| 671 | HLA-A*24:02 | orf1ab polyprotein | 3105 | 3114 | 10 | YSVIYLYLTF  | Consensus (ann/smm) | 0.78 |
| 672 | HLA-A*26:01 | orf1ab polyprotein | 3196 | 3204 | 9  | DVLLPLTQY   | Consensus (ann/smm) | 0.78 |
| 673 | HLA-A*26:01 | orf1ab polyprotein | 6745 | 6754 | 10 | SVIDLLDDF   | Consensus (ann/smm) | 0.78 |
| 674 | HLA-A*31:01 | orf1ab polyprotein | 5392 | 5400 | 9  | MSYYCKSHK   | Consensus (ann/smm) | 0.78 |
| 675 | HLA-A*31:01 | orf1ab polyprotein | 4044 | 4053 | 10 | ALNNIINNAR  | Consensus (ann/smm) | 0.78 |
| 676 | HLA-A*31:01 | orf1ab polyprotein | 3798 | 3805 | 8  | CLLNRYFR    | ann                 | 0.78 |
| 677 | HLA-A*33:03 | orf1ab polyprotein | 5709 | 5716 | 8  | SVVNARLR    | netmhcpa_el         | 0.78 |
| 678 | HLA-A*33:03 | orf1ab polyprotein | 5023 | 5032 | 10 | RIMASLVLAR  | netmhcpa_el         | 0.78 |
| 679 | HLA-A*02:01 | orf1ab polyprotein | 1984 | 1994 | 11 | KLLHKPIVWHV | Consensus (ann/smm) | 0.77 |
| 680 | HLA-A*02:01 | orf1ab polyprotein | 2379 | 2388 | 10 | AMVRMYIFFA  | Consensus (ann/smm) | 0.77 |
| 681 | HLA-A*02:06 | orf1ab polyprotein | 2121 | 2130 | 10 | TLATHGLAAV  | Consensus (ann/smm) | 0.77 |
| 682 | HLA-A*02:06 | orf1ab polyprotein | 84   | 92   | 9  | VMVELVAEL   | Consensus (ann/smm) | 0.77 |
| 683 | HLA-A*03:01 | orf1ab polyprotein | 6972 | 6980 | 9  | HSWNADLYK   | Consensus (ann/smm) | 0.77 |
| 684 | HLA-A*03:01 | orf1ab polyprotein | 675  | 684  | 10 | VQTFKLVNK   | Consensus (ann/smm) | 0.77 |
| 685 | HLA-A*11:01 | orf1ab polyprotein | 1056 | 1066 | 11 | VVVNAANVYLK | Consensus (ann/smm) | 0.77 |
| 686 | HLA-A*11:01 | orf1ab polyprotein | 3645 | 3654 | 10 | ATVAYFNMVY  | Consensus (ann/smm) | 0.77 |
| 687 | HLA-A*11:01 | orf1ab polyprotein | 329  | 338  | 10 | TSWQTGDFVK  | Consensus (ann/smm) | 0.77 |
| 688 | HLA-A*31:01 | orf1ab polyprotein | 4953 | 4961 | 9  | SICSTMTNR   | Consensus (ann/smm) | 0.77 |
| 689 | HLA-A*31:01 | orf1ab polyprotein | 4732 | 4741 | 10 | FVVSTGYHFR  | Consensus (ann/smm) | 0.77 |
| 690 | HLA-A*33:03 | orf1ab polyprotein | 102  | 110  | 9  | ETLGLVPH    | netmhcpa_el         | 0.77 |
| 691 | HLA-A*33:03 | orf1ab polyprotein | 111  | 119  | 9  | VGEIPVAYR   | netmhcpa_el         | 0.77 |
| 692 | HLA-A*33:03 | orf1ab polyprotein | 3152 | 3160 | 9  | HFYWFFSNY   | netmhcpa_el         | 0.77 |

|     |             |                    |      |      |    |             |                     |      |
|-----|-------------|--------------------|------|------|----|-------------|---------------------|------|
| 693 | HLA-A*33:03 | orf1ab polyprotein | 3872 | 3880 | 9  | LLSVLQQLR   | netmhcpa_el         | 0.77 |
| 694 | HLA-A*33:03 | orf1ab polyprotein | 5220 | 5228 | 9  | YLPYPDPSR   | netmhcpa_el         | 0.77 |
| 695 | HLA-A*33:03 | orf1ab polyprotein | 5744 | 5751 | 8  | EYFNSVCR    | netmhcpa_el         | 0.77 |
| 696 | HLA-A*33:03 | orf1ab polyprotein | 5819 | 5826 | 8  | VVREFLTR    | netmhcpa_el         | 0.77 |
| 697 | HLA-A*33:03 | orf1ab polyprotein | 4044 | 4053 | 10 | ALNNIINNAR  | netmhcpa_el         | 0.77 |
| 698 | HLA-A*33:03 | orf1ab polyprotein | 5444 | 5453 | 10 | YILANTCTER  | netmhcpa_el         | 0.77 |
| 699 | HLA-A*02:01 | orf1ab polyprotein | 4138 | 4147 | 10 | KLQNNELSPV  | Consensus (ann/smm) | 0.76 |
| 700 | HLA-A*02:01 | orf1ab polyprotein | 2121 | 2130 | 10 | TLATHGLAAV  | Consensus (ann/smm) | 0.76 |
| 701 | HLA-A*02:06 | orf1ab polyprotein | 4138 | 4147 | 10 | KLQNNELSPV  | Consensus (ann/smm) | 0.76 |
| 702 | HLA-A*03:01 | orf1ab polyprotein | 1852 | 1860 | 9  | LLTKSSEYK   | Consensus (ann/smm) | 0.76 |
| 703 | HLA-A*11:01 | orf1ab polyprotein | 3177 | 3187 | 11 | EAALCTFLLNK | Consensus (ann/smm) | 0.76 |
| 704 | HLA-A*11:01 | orf1ab polyprotein | 4505 | 4513 | 9  | HISRQLTK    | Consensus (ann/smm) | 0.76 |
| 705 | HLA-A*11:01 | orf1ab polyprotein | 2432 | 2442 | 11 | RSFYVYANGGK | Consensus (ann/smm) | 0.76 |
| 706 | HLA-A*11:01 | orf1ab polyprotein | 542  | 550  | 9  | RVVRSIFSR   | Consensus (ann/smm) | 0.76 |
| 707 | HLA-A*24:02 | orf1ab polyprotein | 5110 | 5119 | 10 | KYVRNLQHRL  | Consensus (ann/smm) | 0.76 |
| 708 | HLA-A*24:02 | orf1ab polyprotein | 3165 | 3175 | 11 | VVFNGVSFSTF | Consensus (ann/smm) | 0.76 |
| 709 | HLA-A*26:01 | orf1ab polyprotein | 2788 | 2796 | 9  | YLITPVHVM   | Consensus (ann/smm) | 0.76 |
| 710 | HLA-A*26:01 | orf1ab polyprotein | 5128 | 5137 | 10 | DVDTDFVNEF  | Consensus (ann/smm) | 0.76 |
| 711 | HLA-A*26:01 | orf1ab polyprotein | 4072 | 4080 | 9  | VVIPDYNTY   | Consensus (ann/smm) | 0.76 |
| 712 | HLA-A*26:01 | orf1ab polyprotein | 1581 | 1590 | 10 | TQVVDMSMY   | Consensus (ann/smm) | 0.76 |
| 713 | HLA-A*33:03 | orf1ab polyprotein | 156  | 164  | 9  | DFQENWNTK   | netmhcpa_el         | 0.76 |
| 714 | HLA-A*33:03 | orf1ab polyprotein | 6456 | 6464 | 9  | NVAFNVVNK   | netmhcpa_el         | 0.76 |
| 715 | HLA-A*33:03 | orf1ab polyprotein | 4418 | 4425 | 8  | TSTDVVYR    | netmhcpa_el         | 0.76 |
| 716 | HLA-A*33:03 | orf1ab polyprotein | 4456 | 4466 | 11 | NLIDSYFVVKR | netmhcpa_el         | 0.76 |
| 717 | HLA-A*33:03 | orf1ab polyprotein | 2180 | 2189 | 10 | CTFTRSTNSR  | netmhcpa_el         | 0.76 |
| 718 | HLA-A*01:01 | orf1ab polyprotein | 2291 | 2301 | 11 | CLSGLDSDTY  | Consensus (ann/smm) | 0.75 |
| 719 | HLA-A*01:01 | orf1ab polyprotein | 2253 | 2262 | 10 | LMSNLGMPSY  | Consensus (ann/smm) | 0.75 |
| 720 | HLA-A*02:01 | orf1ab polyprotein | 4724 | 4733 | 10 | KIFVDGVPFV  | Consensus (ann/smm) | 0.75 |
| 721 | HLA-A*02:06 | orf1ab polyprotein | 4472 | 4481 | 10 | YQHEETIYNL  | Consensus (ann/smm) | 0.75 |

|     |             |                    |      |      |    |             |                     |      |
|-----|-------------|--------------------|------|------|----|-------------|---------------------|------|
| 722 | HLA-A*02:06 | orf1ab polyprotein | 406  | 414  | 9  | FGGCVFSYV   | Consensus (ann/smm) | 0.75 |
| 723 | HLA-A*02:06 | orf1ab polyprotein | 6109 | 6117 | 9  | VLWAHGFEL   | Consensus (ann/smm) | 0.75 |
| 724 | HLA-A*03:01 | orf1ab polyprotein | 3979 | 3988 | 10 | KLKKSILNVAK | Consensus (ann/smm) | 0.75 |
| 725 | HLA-A*11:01 | orf1ab polyprotein | 110  | 120  | 11 | HVGEIPVAYRK | Consensus (ann/smm) | 0.75 |
| 726 | HLA-A*26:01 | orf1ab polyprotein | 755  | 763  | 9  | EVVLKTGDL   | Consensus (ann/smm) | 0.75 |
| 727 | HLA-A*33:03 | orf1ab polyprotein | 2412 | 2420 | 9  | CYKRNRATR   | netmhcpa_el         | 0.75 |
| 728 | HLA-A*33:03 | orf1ab polyprotein | 3316 | 3324 | 9  | NYEDLLIRK   | netmhcpa_el         | 0.75 |
| 729 | HLA-A*33:03 | orf1ab polyprotein | 5502 | 5510 | 9  | RNYVFTGYR   | netmhcpa_el         | 0.75 |
| 730 | HLA-A*33:03 | orf1ab polyprotein | 5710 | 5718 | 9  | VVNARLRAK   | netmhcpa_el         | 0.75 |
| 731 | HLA-A*33:03 | orf1ab polyprotein | 5969 | 5977 | 9  | GIPKDMTYR   | netmhcpa_el         | 0.75 |
| 732 | HLA-A*33:03 | orf1ab polyprotein | 5111 | 5118 | 8  | YVRNLQHR    | netmhcpa_el         | 0.75 |
| 733 | HLA-A*33:03 | orf1ab polyprotein | 3003 | 3012 | 10 | RWVLNNDYYR  | netmhcpa_el         | 0.75 |
| 734 | HLA-A*01:01 | orf1ab polyprotein | 6285 | 6295 | 11 | AYKIEELFYSY | Consensus (ann/smm) | 0.74 |
| 735 | HLA-A*01:01 | orf1ab polyprotein | 3813 | 3822 | 10 | YLVSTQEFRY  | Consensus (ann/smm) | 0.74 |
| 736 | HLA-A*01:01 | orf1ab polyprotein | 6154 | 6162 | 9  | HSIGFDYVY   | Consensus (ann/smm) | 0.74 |
| 737 | HLA-A*01:01 | orf1ab polyprotein | 5736 | 5745 | 10 | LTKGTLEPEY  | Consensus (ann/smm) | 0.74 |
| 738 | HLA-A*01:01 | orf1ab polyprotein | 6673 | 6682 | 10 | FIERYKLEGY  | Consensus (ann/smm) | 0.74 |
| 739 | HLA-A*02:01 | orf1ab polyprotein | 6115 | 6124 | 10 | FELTSMKYFV  | Consensus (ann/smm) | 0.74 |
| 740 | HLA-A*02:06 | orf1ab polyprotein | 3121 | 3130 | 10 | SFLAHIQWMV  | Consensus (ann/smm) | 0.74 |
| 741 | HLA-A*11:01 | orf1ab polyprotein | 5023 | 5032 | 10 | RIMASLVLAR  | Consensus (ann/smm) | 0.74 |
| 742 | HLA-A*11:01 | orf1ab polyprotein | 806  | 816  | 11 | MMVTNNTFTLK | Consensus (ann/smm) | 0.74 |
| 743 | HLA-A*11:01 | orf1ab polyprotein | 2210 | 2219 | 10 | CLEASFNYLK  | Consensus (ann/smm) | 0.74 |
| 744 | HLA-A*24:02 | orf1ab polyprotein | 2345 | 2354 | 10 | AIMQLFFSYF  | Consensus (ann/smm) | 0.74 |
| 745 | HLA-A*24:02 | orf1ab polyprotein | 3751 | 3760 | 10 | VMFLARGIVF  | Consensus (ann/smm) | 0.74 |
| 746 | HLA-A*24:02 | orf1ab polyprotein | 5975 | 5985 | 11 | TYRRLISMMGF | Consensus (ann/smm) | 0.74 |
| 747 | HLA-A*26:01 | orf1ab polyprotein | 6003 | 6011 | 9  | EAIRHVRAW   | Consensus (ann/smm) | 0.74 |
| 748 | HLA-A*31:01 | orf1ab polyprotein | 4632 | 4641 | 10 | LLMPILTTR   | Consensus (ann/smm) | 0.74 |
| 749 | HLA-A*31:01 | orf1ab polyprotein | 4842 | 4849 | 8  | ISDYDYR     | ann                 | 0.74 |
| 750 | HLA-A*33:03 | orf1ab polyprotein | 2407 | 2415 | 9  | STCMMCYKR   | netmhcpa_el         | 0.74 |

|     |             |                    |      |      |    |             |                     |      |
|-----|-------------|--------------------|------|------|----|-------------|---------------------|------|
| 751 | HLA-A*33:03 | orf1ab polyprotein | 2802 | 2810 | 9  | FSSEIIGYK   | netmhcpa_el         | 0.74 |
| 752 | HLA-A*33:03 | orf1ab polyprotein | 6972 | 6980 | 9  | HSWNADLYK   | netmhcpa_el         | 0.74 |
| 753 | HLA-A*33:03 | orf1ab polyprotein | 4459 | 4466 | 8  | DSYFVVKR    | netmhcpa_el         | 0.74 |
| 754 | HLA-A*33:03 | orf1ab polyprotein | 217  | 226  | 10 | EQLDFIDTKR  | netmhcpa_el         | 0.74 |
| 755 | HLA-A*01:01 | orf1ab polyprotein | 1891 | 1899 | 9  | EIDPKLDNY   | Consensus (ann/smm) | 0.73 |
| 756 | HLA-A*01:01 | orf1ab polyprotein | 1022 | 1031 | 10 | TIEVNSFSGY  | Consensus (ann/smm) | 0.73 |
| 757 | HLA-A*01:01 | orf1ab polyprotein | 1823 | 1831 | 9  | CASEYTGNY   | Consensus (ann/smm) | 0.73 |
| 758 | HLA-A*01:01 | orf1ab polyprotein | 1276 | 1285 | 10 | ITFLKKDAPY  | Consensus (ann/smm) | 0.73 |
| 759 | HLA-A*02:06 | orf1ab polyprotein | 2230 | 2238 | 9  | IIWFLLLSV   | Consensus (ann/smm) | 0.73 |
| 760 | HLA-A*03:01 | orf1ab polyprotein | 6429 | 6437 | 9  | AGFSLWVYK   | Consensus (ann/smm) | 0.73 |
| 761 | HLA-A*03:01 | orf1ab polyprotein | 6732 | 6741 | 10 | ITDAQTGSSK  | Consensus (ann/smm) | 0.73 |
| 762 | HLA-A*03:01 | orf1ab polyprotein | 2384 | 2392 | 9  | YIFFASFYY   | Consensus (ann/smm) | 0.73 |
| 763 | HLA-A*11:01 | orf1ab polyprotein | 5038 | 5046 | 9  | CSLSHRFYR   | Consensus (ann/smm) | 0.73 |
| 764 | HLA-A*11:01 | orf1ab polyprotein | 4840 | 4849 | 10 | AAISDYDYR   | Consensus (ann/smm) | 0.73 |
| 765 | HLA-A*11:01 | orf1ab polyprotein | 7003 | 7012 | 10 | FLIGCNLYGK  | Consensus (ann/smm) | 0.73 |
| 766 | HLA-A*24:02 | orf1ab polyprotein | 805  | 813  | 9  | NMMVNTNTF   | Consensus (ann/smm) | 0.73 |
| 767 | HLA-A*26:01 | orf1ab polyprotein | 5002 | 5011 | 10 | ENPHLMGWDY  | Consensus (ann/smm) | 0.73 |
| 768 | HLA-A*26:01 | orf1ab polyprotein | 5532 | 5541 | 10 | AVVYRGTTTY  | Consensus (ann/smm) | 0.73 |
| 769 | HLA-A*26:01 | orf1ab polyprotein | 5568 | 5577 | 10 | EHYVRITGLY  | Consensus (ann/smm) | 0.73 |
| 770 | HLA-A*31:01 | orf1ab polyprotein | 5489 | 5497 | 9  | LSWEVGKPR   | Consensus (ann/smm) | 0.73 |
| 771 | HLA-A*31:01 | orf1ab polyprotein | 543  | 550  | 8  | VVRSIFSR    | ann                 | 0.73 |
| 772 | HLA-A*31:01 | orf1ab polyprotein | 5792 | 5801 | 10 | SAQCFKMFYK  | Consensus (ann/smm) | 0.73 |
| 773 | HLA-A*33:03 | orf1ab polyprotein | 2070 | 2078 | 9  | EVVGDIIK    | netmhcpa_el         | 0.73 |
| 774 | HLA-A*33:03 | orf1ab polyprotein | 4633 | 4641 | 9  | LMPILTLTR   | netmhcpa_el         | 0.73 |
| 775 | HLA-A*33:03 | orf1ab polyprotein | 4716 | 4723 | 8  | TSGGPLVR    | netmhcpa_el         | 0.73 |
| 776 | HLA-A*33:03 | orf1ab polyprotein | 2628 | 2638 | 11 | NVLSTFISAAR | netmhcpa_el         | 0.73 |
| 777 | HLA-A*33:03 | orf1ab polyprotein | 1458 | 1467 | 10 | NLEEAARYMR  | netmhcpa_el         | 0.73 |
| 778 | HLA-A*33:03 | orf1ab polyprotein | 1694 | 1703 | 10 | ALQDAYRARR  | netmhcpa_el         | 0.73 |
| 779 | HLA-A*01:01 | orf1ab polyprotein | 2404 | 2413 | 10 | CNSSTCMICY  | Consensus (ann/smm) | 0.72 |

|     |             |                    |      |      |    |             |                     |      |
|-----|-------------|--------------------|------|------|----|-------------|---------------------|------|
| 780 | HLA-A*01:01 | orf1ab polyprotein | 2321 | 2331 | 11 | FGLVAEWFLAY | Consensus (ann/smm) | 0.72 |
| 781 | HLA-A*01:01 | orf1ab polyprotein | 5130 | 5139 | 10 | DTDFVNEFYA  | Consensus (ann/smm) | 0.72 |
| 782 | HLA-A*02:01 | orf1ab polyprotein | 5146 | 5155 | 10 | SMMILSDDAV  | Consensus (ann/smm) | 0.72 |
| 783 | HLA-A*02:01 | orf1ab polyprotein | 6165 | 6174 | 10 | FMIDVQQWGF  | Consensus (ann/smm) | 0.72 |
| 784 | HLA-A*02:06 | orf1ab polyprotein | 3467 | 3475 | 9  | VLAWLYAAV   | Consensus (ann/smm) | 0.72 |
| 785 | HLA-A*02:06 | orf1ab polyprotein | 4480 | 4488 | 9  | NLLKDCPAV   | Consensus (ann/smm) | 0.72 |
| 786 | HLA-A*03:01 | orf1ab polyprotein | 313  | 322  | 10 | NQMCLSTLMK  | Consensus (ann/smm) | 0.72 |
| 787 | HLA-A*03:01 | orf1ab polyprotein | 6593 | 6601 | 9  | VLITEGSVK   | Consensus (ann/smm) | 0.72 |
| 788 | HLA-A*03:01 | orf1ab polyprotein | 5603 | 5612 | 10 | TLQGGPGTGK  | Consensus (ann/smm) | 0.72 |
| 789 | HLA-A*11:01 | orf1ab polyprotein | 2891 | 2901 | 11 | AVGNICYTPSK | Consensus (ann/smm) | 0.72 |
| 790 | HLA-A*11:01 | orf1ab polyprotein | 1645 | 1654 | 10 | RYMSALNHTK  | Consensus (ann/smm) | 0.72 |
| 791 | HLA-A*24:02 | orf1ab polyprotein | 4811 | 4820 | 10 | FYDFAVSKGF  | Consensus (ann/smm) | 0.72 |
| 792 | HLA-A*26:01 | orf1ab polyprotein | 2435 | 2444 | 10 | YVYANGGKGF  | Consensus (ann/smm) | 0.72 |
| 793 | HLA-A*26:01 | orf1ab polyprotein | 4863 | 4872 | 10 | FVVEVVDKYF  | Consensus (ann/smm) | 0.72 |
| 794 | HLA-A*31:01 | orf1ab polyprotein | 5024 | 5032 | 9  | IMASLVLAR   | Consensus (ann/smm) | 0.72 |
| 795 | HLA-A*31:01 | orf1ab polyprotein | 2406 | 2415 | 10 | SSTCMMCYKR  | Consensus (ann/smm) | 0.72 |
| 796 | HLA-A*33:03 | orf1ab polyprotein | 2801 | 2810 | 10 | DFSSEIIGYK  | netmhcpa_el         | 0.72 |
| 797 | HLA-A*33:03 | orf1ab polyprotein | 4632 | 4641 | 10 | LLMPILTTR   | netmhcpa_el         | 0.72 |
| 798 | HLA-A*33:03 | orf1ab polyprotein | 5707 | 5716 | 10 | DLSVVNARLR  | netmhcpa_el         | 0.72 |
| 799 | HLA-A*01:01 | orf1ab polyprotein | 5791 | 5800 | 10 | KSAQCCKMFY  | Consensus (ann/smm) | 0.71 |
| 800 | HLA-A*01:01 | orf1ab polyprotein | 6668 | 6677 | 10 | LAMDEFIERY  | Consensus (ann/smm) | 0.71 |
| 801 | HLA-A*02:01 | orf1ab polyprotein | 3025 | 3034 | 10 | NLLTNMFTPL  | Consensus (ann/smm) | 0.71 |
| 802 | HLA-A*02:06 | orf1ab polyprotein | 3088 | 3097 | 10 | SFTVLCLTPV  | Consensus (ann/smm) | 0.71 |
| 803 | HLA-A*02:06 | orf1ab polyprotein | 3605 | 3613 | 9  | FLYENAFPL   | Consensus (ann/smm) | 0.71 |
| 804 | HLA-A*02:06 | orf1ab polyprotein | 4725 | 4733 | 9  | IFVDGVPFV   | Consensus (ann/smm) | 0.71 |
| 805 | HLA-A*02:06 | orf1ab polyprotein | 6781 | 6790 | 10 | FMLWCKDGHV  | Consensus (ann/smm) | 0.71 |
| 806 | HLA-A*03:01 | orf1ab polyprotein | 814  | 822  | 9  | TLKGGAPTK   | Consensus (ann/smm) | 0.71 |
| 807 | HLA-A*03:01 | orf1ab polyprotein | 5791 | 5801 | 11 | KSAQCCKMFYK | Consensus (ann/smm) | 0.71 |
| 808 | HLA-A*03:01 | orf1ab polyprotein | 1462 | 1470 | 9  | AARYMRSRK   | Consensus (ann/smm) | 0.71 |

|     |             |                    |      |      |    |             |                                        |      |
|-----|-------------|--------------------|------|------|----|-------------|----------------------------------------|------|
| 809 | HLA-A*11:01 | orf1ab polyprotein | 4956 | 4966 | 11 | STMTNRQFHQK | Consensus (ann/smm)                    | 0.71 |
| 810 | HLA-A*11:01 | orf1ab polyprotein | 1310 | 1319 | 10 | TEMLAKALRK  | Consensus (ann/smm)                    | 0.71 |
| 811 | HLA-A*11:01 | orf1ab polyprotein | 555  | 564  | 10 | AQNSVRVLQK  | Consensus (ann/smm)                    | 0.71 |
| 812 | HLA-A*26:01 | orf1ab polyprotein | 1414 | 1422 | 9  | GVVDYGARF   | Consensus (ann/smm)                    | 0.71 |
| 813 | HLA-A*26:01 | orf1ab polyprotein | 4732 | 4740 | 9  | FVVSTGYHF   | Consensus (ann/smm)                    | 0.71 |
| 814 | HLA-A*31:01 | orf1ab polyprotein | 2328 | 2336 | 9  | FLAYILFTR   | Consensus (ann/smm)                    | 0.71 |
| 815 | HLA-A*31:01 | orf1ab polyprotein | 7073 | 7081 | 9  | LSKGRLIIR   | Consensus (ann/smm)                    | 0.71 |
| 816 | HLA-A*01:01 | orf1ab polyprotein | 4185 | 4193 | 9  | LSDLQDLKW   | Consensus (ann/smm)                    | 0.7  |
| 817 | HLA-A*01:01 | orf1ab polyprotein | 6055 | 6063 | 9  | NTDFSRVSA   | Consensus (ann/smm)                    | 0.7  |
| 818 | HLA-A*01:01 | orf1ab polyprotein | 1964 | 1972 | 9  | NGDVVAIDY   | Consensus (ann/smm)                    | 0.7  |
| 819 | HLA-A*01:01 | orf1ab polyprotein | 5215 | 5223 | 9  | GDDYVYLPY   | Consensus (ann/smm)                    | 0.7  |
| 820 | HLA-A*02:01 | orf1ab polyprotein | 641  | 649  | 9  | FLRDGWEIV   | Consensus (ann/comblib_sidney2008/smm) | 0.7  |
| 821 | HLA-A*02:01 | orf1ab polyprotein | 2392 | 2400 | 9  | YVWKSIVHV   | Consensus (ann/comblib_sidney2008/smm) | 0.7  |
| 822 | HLA-A*02:01 | orf1ab polyprotein | 2563 | 2571 | 9  | QLMCQPILL   | Consensus (ann/comblib_sidney2008/smm) | 0.7  |
| 823 | HLA-A*02:01 | orf1ab polyprotein | 3013 | 3021 | 9  | SLPGVFCGV   | Consensus (ann/comblib_sidney2008/smm) | 0.7  |
| 824 | HLA-A*02:01 | orf1ab polyprotein | 3807 | 3815 | 9  | TLGVYDYL    | Consensus (ann/comblib_sidney2008/smm) | 0.7  |
| 825 | HLA-A*02:01 | orf1ab polyprotein | 4283 | 4291 | 9  | YLASGGQPI   | Consensus (ann/comblib_sidney2008/smm) | 0.7  |
| 826 | HLA-A*02:01 | orf1ab polyprotein | 4480 | 4488 | 9  | NLLKDCPAV   | Consensus (ann/comblib_sidney2008/smm) | 0.7  |
| 827 | HLA-A*02:01 | orf1ab polyprotein | 4514 | 4522 | 9  | YTMADLVYA   | Consensus (ann/comblib_sidney2008/smm) | 0.7  |
| 828 | HLA-A*02:01 | orf1ab polyprotein | 5133 | 5141 | 9  | FVNEFYAYL   | Consensus (ann/comblib_sidney2008/smm) | 0.7  |
| 829 | HLA-A*02:01 | orf1ab polyprotein | 5563 | 5571 | 9  | TLVPQEHYV   | Consensus (ann/comblib_sidney2008/smm) | 0.7  |
| 830 | HLA-A*02:01 | orf1ab polyprotein | 6782 | 6790 | 9  | MLWCKDGHV   | Consensus (ann/comblib_sidney2008/smm) | 0.7  |
| 831 | HLA-A*02:01 | orf1ab polyprotein | 6886 | 6894 | 9  | WLPTGTLV    | Consensus (ann/comblib_sidney2008/smm) | 0.7  |
| 832 | HLA-A*02:01 | orf1ab polyprotein | 6908 | 6916 | 9  | TLIGDCATV   | Consensus (ann/comblib_sidney2008/smm) | 0.7  |
| 833 | HLA-A*02:01 | orf1ab polyprotein | 2563 | 2572 | 10 | QLMCQPILL   | Consensus (ann/smm)                    | 0.7  |
| 834 | HLA-A*02:06 | orf1ab polyprotein | 3466 | 3474 | 9  | NVLAWLYAA   | Consensus (ann/smm)                    | 0.7  |
| 835 | HLA-A*02:06 | orf1ab polyprotein | 6695 | 6704 | 10 | SQLGGLHLI   | Consensus (ann/smm)                    | 0.7  |
| 836 | HLA-A*03:01 | orf1ab polyprotein | 5899 | 5908 | 10 | IMSDRDLYDK  | Consensus (ann/smm)                    | 0.7  |
| 837 | HLA-A*03:01 | orf1ab polyprotein | 2915 | 2923 | 9  | LAAECTIFK   | Consensus (ann/smm)                    | 0.7  |

|     |             |                    |      |      |    |             |                     |      |
|-----|-------------|--------------------|------|------|----|-------------|---------------------|------|
| 838 | HLA-A*11:01 | orf1ab polyprotein | 2388 | 2395 | 8  | ASFYYVWK    | Consensus (ann/smm) | 0.7  |
| 839 | HLA-A*11:01 | orf1ab polyprotein | 2731 | 2741 | 11 | SAAKKNNLPFK | Consensus (ann/smm) | 0.7  |
| 840 | HLA-A*11:01 | orf1ab polyprotein | 4004 | 4014 | 11 | MADQAMTQMYK | Consensus (ann/smm) | 0.7  |
| 841 | HLA-A*11:01 | orf1ab polyprotein | 4457 | 4465 | 9  | LIDSYFVVK   | Consensus (ann/smm) | 0.7  |
| 842 | HLA-A*11:01 | orf1ab polyprotein | 5163 | 5172 | 10 | ASQGLVASIK  | Consensus (ann/smm) | 0.7  |
| 843 | HLA-A*11:01 | orf1ab polyprotein | 1104 | 1112 | 9  | VLSGHNLAK   | Consensus (ann/smm) | 0.7  |
| 844 | HLA-A*24:02 | orf1ab polyprotein | 4088 | 4096 | 9  | TFTYASALW   | Consensus (ann/smm) | 0.7  |
| 845 | HLA-A*24:02 | orf1ab polyprotein | 3606 | 3615 | 10 | LYENAFLPFA  | Consensus (ann/smm) | 0.7  |
| 846 | HLA-A*26:01 | orf1ab polyprotein | 6154 | 6162 | 9  | HSIGFDYVY   | Consensus (ann/smm) | 0.7  |
| 847 | HLA-A*31:01 | orf1ab polyprotein | 4417 | 4425 | 9  | GTSTDVVYR   | Consensus (ann/smm) | 0.7  |
| 848 | HLA-A*33:03 | orf1ab polyprotein | 1311 | 1318 | 8  | EMLAKALR    | netmhcpa_el         | 0.7  |
| 849 | HLA-A*01:01 | orf1ab polyprotein | 5150 | 5158 | 9  | LSDDAVVCF   | Consensus (ann/smm) | 0.69 |
| 850 | HLA-A*01:01 | orf1ab polyprotein | 3710 | 3719 | 10 | TLMNVLTLY   | Consensus (ann/smm) | 0.69 |
| 851 | HLA-A*02:01 | orf1ab polyprotein | 6108 | 6117 | 10 | FVLWAHGFEL  | Consensus (ann/smm) | 0.69 |
| 852 | HLA-A*02:01 | orf1ab polyprotein | 3083 | 3092 | 10 | LLFLMSFTVL  | Consensus (ann/smm) | 0.69 |
| 853 | HLA-A*03:01 | orf1ab polyprotein | 5824 | 5832 | 9  | LTRNPAWRK   | Consensus (ann/smm) | 0.69 |
| 854 | HLA-A*03:01 | orf1ab polyprotein | 6669 | 6678 | 10 | AMDEFIERYK  | Consensus (ann/smm) | 0.69 |
| 855 | HLA-A*03:01 | orf1ab polyprotein | 5058 | 5066 | 9  | MVMCGGSLY   | Consensus (ann/smm) | 0.69 |
| 856 | HLA-A*11:01 | orf1ab polyprotein | 1024 | 1033 | 10 | EVNSFSGYLK  | Consensus (ann/smm) | 0.69 |
| 857 | HLA-A*11:01 | orf1ab polyprotein | 3183 | 3192 | 10 | FLLNKEMYLK  | Consensus (ann/smm) | 0.69 |
| 858 | HLA-A*11:01 | orf1ab polyprotein | 3669 | 3678 | 10 | MVDTSLSGFK  | Consensus (ann/smm) | 0.69 |
| 859 | HLA-A*24:02 | orf1ab polyprotein | 1918 | 1928 | 11 | QPYPNASFDNF | Consensus (ann/smm) | 0.69 |
| 860 | HLA-A*26:01 | orf1ab polyprotein | 3149 | 3157 | 9  | STKHFWFF    | Consensus (ann/smm) | 0.69 |
| 861 | HLA-A*26:01 | orf1ab polyprotein | 264  | 273  | 10 | DTFNCEPNF   | Consensus (ann/smm) | 0.69 |
| 862 | HLA-A*26:01 | orf1ab polyprotein | 5153 | 5162 | 10 | DAVVCFNSTY  | Consensus (ann/smm) | 0.69 |
| 863 | HLA-A*31:01 | orf1ab polyprotein | 2977 | 2985 | 9  | TFDSEYCR    | Consensus (ann/smm) | 0.69 |
| 864 | HLA-A*33:03 | orf1ab polyprotein | 3355 | 3363 | 9  | DTANPKTPK   | netmhcpa_el         | 0.69 |
| 865 | HLA-A*33:03 | orf1ab polyprotein | 6535 | 6542 | 8  | TVIWDYKR    | netmhcpa_el         | 0.69 |
| 866 | HLA-A*33:03 | orf1ab polyprotein | 4514 | 4524 | 11 | YTMADLVYALR | netmhcpa_el         | 0.69 |

|     |             |                    |      |      |    |            |                                        |      |
|-----|-------------|--------------------|------|------|----|------------|----------------------------------------|------|
| 867 | HLA-A*33:03 | orf1ab polyprotein | 536  | 545  | 10 | FASEAARVVR | netmhcpa_el                            | 0.69 |
| 868 | HLA-A*33:03 | orf1ab polyprotein | 5910 | 5919 | 10 | QFTSLEIPRR | netmhcpa_el                            | 0.69 |
| 869 | HLA-A*02:06 | orf1ab polyprotein | 680  | 688  | 9  | KLVNKFLAL  | Consensus (ann/smm)                    | 0.68 |
| 870 | HLA-A*02:06 | orf1ab polyprotein | 5989 | 5997 | 9  | YQVNGYPNM  | Consensus (ann/smm)                    | 0.68 |
| 871 | HLA-A*24:02 | orf1ab polyprotein | 3113 | 3122 | 10 | TFYLTNDVSF | Consensus (ann/smm)                    | 0.68 |
| 872 | HLA-A*26:01 | orf1ab polyprotein | 4259 | 4267 | 9  | EVPANSTVL  | Consensus (ann/smm)                    | 0.68 |
| 873 | HLA-A*26:01 | orf1ab polyprotein | 88   | 97   | 10 | LVAELEGIQY | Consensus (ann/smm)                    | 0.68 |
| 874 | HLA-A*26:01 | orf1ab polyprotein | 4648 | 4657 | 10 | HVDTDLTKPY | Consensus (ann/smm)                    | 0.68 |
| 875 | HLA-A*31:01 | orf1ab polyprotein | 5470 | 5479 | 10 | KLSYGIATVR | Consensus (ann/smm)                    | 0.68 |
| 876 | HLA-A*31:01 | orf1ab polyprotein | 5035 | 5043 | 9  | TTCCSLSHR  | Consensus (ann/smm)                    | 0.68 |
| 877 | HLA-A*33:03 | orf1ab polyprotein | 1189 | 1197 | 9  | SFLEMKSEK  | netmhcpa_el                            | 0.68 |
| 878 | HLA-A*33:03 | orf1ab polyprotein | 6308 | 6316 | 9  | LFWNCNVDR  | netmhcpa_el                            | 0.68 |
| 879 | HLA-A*01:01 | orf1ab polyprotein | 6419 | 6427 | 9  | YLDAYNMMI  | Consensus (ann/smm)                    | 0.67 |
| 880 | HLA-A*01:01 | orf1ab polyprotein | 4004 | 4013 | 10 | MADQAMTQMY | Consensus (ann/smm)                    | 0.67 |
| 881 | HLA-A*01:01 | orf1ab polyprotein | 4839 | 4848 | 10 | NAAISDYDYY | Consensus (ann/smm)                    | 0.67 |
| 882 | HLA-A*02:01 | orf1ab polyprotein | 3917 | 3925 | 9  | VLLSMQGAV  | Consensus (ann/comblib_sidney2008/smm) | 0.67 |
| 883 | HLA-A*02:01 | orf1ab polyprotein | 2901 | 2910 | 10 | KLIEYDFAT  | Consensus (ann/smm)                    | 0.67 |
| 884 | HLA-A*02:06 | orf1ab polyprotein | 3126 | 3135 | 10 | IQWMVMFTPL | Consensus (ann/smm)                    | 0.67 |
| 885 | HLA-A*02:06 | orf1ab polyprotein | 3620 | 3629 | 10 | AMSAFAMMFV | Consensus (ann/smm)                    | 0.67 |
| 886 | HLA-A*02:06 | orf1ab polyprotein | 3753 | 3761 | 9  | FLARGIVFM  | Consensus (ann/smm)                    | 0.67 |
| 887 | HLA-A*02:06 | orf1ab polyprotein | 2243 | 2252 | 10 | LIYSTAALGV | Consensus (ann/smm)                    | 0.67 |
| 888 | HLA-A*03:01 | orf1ab polyprotein | 3103 | 3111 | 9  | GVYSVIYLY  | Consensus (ann/smm)                    | 0.67 |
| 889 | HLA-A*03:01 | orf1ab polyprotein | 1295 | 1304 | 10 | VLTAVVIPTK | Consensus (ann/smm)                    | 0.67 |
| 890 | HLA-A*11:01 | orf1ab polyprotein | 1808 | 1817 | 10 | SAPPAQYELK | Consensus (ann/smm)                    | 0.67 |
| 891 | HLA-A*11:01 | orf1ab polyprotein | 2821 | 2830 | 10 | ASTDTCFANK | Consensus (ann/smm)                    | 0.67 |
| 892 | HLA-A*24:02 | orf1ab polyprotein | 2826 | 2834 | 9  | CFANKHADP  | Consensus (ann/smm)                    | 0.67 |
| 893 | HLA-A*24:02 | orf1ab polyprotein | 2953 | 2961 | 9  | RYVLMGDSI  | Consensus (ann/smm)                    | 0.67 |
| 894 | HLA-A*24:02 | orf1ab polyprotein | 5905 | 5914 | 10 | LYDKLQFTSL | Consensus (ann/smm)                    | 0.67 |
| 895 | HLA-A*26:01 | orf1ab polyprotein | 3906 | 3914 | 9  | EAFEKMVSL  | Consensus (ann/smm)                    | 0.67 |

|     |             |                    |      |      |    |            |                     |      |
|-----|-------------|--------------------|------|------|----|------------|---------------------|------|
| 896 | HLA-A*26:01 | orf1ab polyprotein | 1384 | 1392 | 9  | ETRKLMPVC  | Consensus (ann/smm) | 0.67 |
| 897 | HLA-A*26:01 | orf1ab polyprotein | 4667 | 4675 | 9  | FTEERLKLF  | Consensus (ann/smm) | 0.67 |
| 898 | HLA-A*31:01 | orf1ab polyprotein | 6625 | 6633 | 9  | KTQFNYYKK  | Consensus (ann/smm) | 0.67 |
| 899 | HLA-A*33:03 | orf1ab polyprotein | 2507 | 2515 | 9  | KAGQKTYER  | netmhcpa_el         | 0.67 |
| 900 | HLA-A*01:01 | orf1ab polyprotein | 6776 | 6784 | 9  | YTEISFMLW  | Consensus (ann/smm) | 0.66 |
| 901 | HLA-A*02:06 | orf1ab polyprotein | 612  | 620  | 9  | WLTNIFGTV  | Consensus (ann/smm) | 0.66 |
| 902 | HLA-A*02:06 | orf1ab polyprotein | 3587 | 3595 | 9  | ILTSLLVLV  | Consensus (ann/smm) | 0.66 |
| 903 | HLA-A*03:01 | orf1ab polyprotein | 5977 | 5986 | 10 | RRLISMMGFK | Consensus (ann/smm) | 0.66 |
| 904 | HLA-A*11:01 | orf1ab polyprotein | 2020 | 2029 | 10 | ETSNSFDVLK | Consensus (ann/smm) | 0.66 |
| 905 | HLA-A*11:01 | orf1ab polyprotein | 4733 | 4741 | 9  | VVSTGYHFR  | Consensus (ann/smm) | 0.66 |
| 906 | HLA-A*11:01 | orf1ab polyprotein | 283  | 291  | 9  | TIQPRVEKK  | Consensus (ann/smm) | 0.66 |
| 907 | HLA-A*11:01 | orf1ab polyprotein | 411  | 419  | 9  | FSYVGCHNK  | Consensus (ann/smm) | 0.66 |
| 908 | HLA-A*24:02 | orf1ab polyprotein | 422  | 431  | 10 | YWVPRASANI | Consensus (ann/smm) | 0.66 |
| 909 | HLA-A*24:02 | orf1ab polyprotein | 3153 | 3161 | 9  | FYWFFSNYL  | Consensus (ann/smm) | 0.66 |
| 910 | HLA-A*26:01 | orf1ab polyprotein | 220  | 229  | 10 | DFIDTKRGVY | Consensus (ann/smm) | 0.66 |
| 911 | HLA-A*26:01 | orf1ab polyprotein | 6942 | 6950 | 9  | DSKEGFFTY  | Consensus (ann/smm) | 0.66 |
| 912 | HLA-A*31:01 | orf1ab polyprotein | 5471 | 5479 | 9  | LSYGIATVR  | Consensus (ann/smm) | 0.66 |
| 913 | HLA-A*33:03 | orf1ab polyprotein | 6443 | 6450 | 8  | NLWNTFTR   | netmhcpa_el         | 0.66 |
| 914 | HLA-A*01:01 | orf1ab polyprotein | 2552 | 2560 | 9  | SSAKSASVY  | Consensus (ann/smm) | 0.65 |
| 915 | HLA-A*02:01 | orf1ab polyprotein | 5982 | 5991 | 10 | MMGFKMNYQV | Consensus (ann/smm) | 0.65 |
| 916 | HLA-A*02:06 | orf1ab polyprotein | 2348 | 2356 | 9  | QLFFSYFAV  | Consensus (ann/smm) | 0.65 |
| 917 | HLA-A*02:06 | orf1ab polyprotein | 3488 | 3496 | 9  | TTLNDFNLV  | Consensus (ann/smm) | 0.65 |
| 918 | HLA-A*02:06 | orf1ab polyprotein | 3838 | 3847 | 10 | FKLNIKLLGV | Consensus (ann/smm) | 0.65 |
| 919 | HLA-A*02:06 | orf1ab polyprotein | 331  | 339  | 9  | WQTGDFVKA  | Consensus (ann/smm) | 0.65 |
| 920 | HLA-A*03:01 | orf1ab polyprotein | 4565 | 4573 | 9  | RVYANLGER  | Consensus (ann/smm) | 0.65 |
| 921 | HLA-A*03:01 | orf1ab polyprotein | 2405 | 2414 | 10 | NSSTCMMCYK | Consensus (ann/smm) | 0.65 |
| 922 | HLA-A*03:01 | orf1ab polyprotein | 5951 | 5959 | 9  | HLSVDTKFK  | Consensus (ann/smm) | 0.65 |
| 923 | HLA-A*03:01 | orf1ab polyprotein | 5504 | 5513 | 10 | YVFTGYRVTK | Consensus (ann/smm) | 0.65 |
| 924 | HLA-A*11:01 | orf1ab polyprotein | 5710 | 5718 | 9  | VVNARLRAK  | Consensus (ann/smm) | 0.65 |

|     |             |                    |      |      |    |             |                     |      |
|-----|-------------|--------------------|------|------|----|-------------|---------------------|------|
| 925 | HLA-A*11:01 | orf1ab polyprotein | 6092 | 6100 | 9  | VQMLSDTLK   | Consensus (ann/smm) | 0.65 |
| 926 | HLA-A*11:01 | orf1ab polyprotein | 728  | 737  | 10 | GLLMPLKAPK  | Consensus (ann/smm) | 0.65 |
| 927 | HLA-A*24:02 | orf1ab polyprotein | 2098 | 2107 | 10 | AYVDNSSLTI  | Consensus (ann/smm) | 0.65 |
| 928 | HLA-A*24:02 | orf1ab polyprotein | 3708 | 3717 | 10 | VWTLMNVLTL  | Consensus (ann/smm) | 0.65 |
| 929 | HLA-A*24:02 | orf1ab polyprotein | 3485 | 3493 | 9  | RFTTTLNDF   | Consensus (ann/smm) | 0.65 |
| 930 | HLA-A*26:01 | orf1ab polyprotein | 3645 | 3654 | 10 | ATVAYFNMVY  | Consensus (ann/smm) | 0.65 |
| 931 | HLA-A*26:01 | orf1ab polyprotein | 5539 | 5548 | 10 | TTYKLNVDY   | Consensus (ann/smm) | 0.65 |
| 932 | HLA-A*31:01 | orf1ab polyprotein | 4488 | 4497 | 10 | VAKHDFKFR   | Consensus (ann/smm) | 0.65 |
| 933 | HLA-A*31:01 | orf1ab polyprotein | 6308 | 6316 | 9  | LFWNCNVDR   | Consensus (ann/smm) | 0.65 |
| 934 | HLA-A*33:03 | orf1ab polyprotein | 394  | 402  | 9  | KTILRKGGR   | netmhcpa_el         | 0.65 |
| 935 | HLA-A*33:03 | orf1ab polyprotein | 3797 | 3805 | 9  | FCLLNRYFR   | netmhcpa_el         | 0.65 |
| 936 | HLA-A*33:03 | orf1ab polyprotein | 5823 | 5831 | 9  | FLTRNPAWR   | netmhcpa_el         | 0.65 |
| 937 | HLA-A*33:03 | orf1ab polyprotein | 5993 | 6001 | 9  | GYPNMFITR   | netmhcpa_el         | 0.65 |
| 938 | HLA-A*33:03 | orf1ab polyprotein | 6478 | 6486 | 9  | IINNTVYTK   | netmhcpa_el         | 0.65 |
| 939 | HLA-A*33:03 | orf1ab polyprotein | 6508 | 6516 | 9  | ELWAKRNIK   | netmhcpa_el         | 0.65 |
| 940 | HLA-A*33:03 | orf1ab polyprotein | 5219 | 5228 | 10 | VYLPYPDPSR  | netmhcpa_el         | 0.65 |
| 941 | HLA-A*01:01 | orf1ab polyprotein | 6853 | 6861 | 9  | NTLTAVPY    | Consensus (ann/smm) | 0.64 |
| 942 | HLA-A*01:01 | orf1ab polyprotein | 915  | 925  | 11 | KLASHMYCSFY | Consensus (ann/smm) | 0.64 |
| 943 | HLA-A*01:01 | orf1ab polyprotein | 5539 | 5548 | 10 | TTYKLNVDY   | Consensus (ann/smm) | 0.64 |
| 944 | HLA-A*01:01 | orf1ab polyprotein | 2236 | 2245 | 10 | LSVCLGSLIY  | Consensus (ann/smm) | 0.64 |
| 945 | HLA-A*02:06 | orf1ab polyprotein | 3614 | 3623 | 10 | FAMGIIAMSA  | Consensus (ann/smm) | 0.64 |
| 946 | HLA-A*03:01 | orf1ab polyprotein | 2307 | 2315 | 9  | IQITISSFK   | Consensus (ann/smm) | 0.64 |
| 947 | HLA-A*03:01 | orf1ab polyprotein | 5024 | 5032 | 9  | IMASLVLAR   | Consensus (ann/smm) | 0.64 |
| 948 | HLA-A*03:01 | orf1ab polyprotein | 5453 | 5463 | 11 | RLKLFAAETLK | Consensus (ann/smm) | 0.64 |
| 949 | HLA-A*03:01 | orf1ab polyprotein | 3779 | 3788 | 10 | IMLVYCFLGY  | Consensus (ann/smm) | 0.64 |
| 950 | HLA-A*03:01 | orf1ab polyprotein | 4481 | 4490 | 10 | LLKDCPAVAK  | Consensus (ann/smm) | 0.64 |
| 951 | HLA-A*11:01 | orf1ab polyprotein | 490  | 500  | 11 | TVKGLDYKAFK | Consensus (ann/smm) | 0.64 |
| 952 | HLA-A*11:01 | orf1ab polyprotein | 2163 | 2171 | 9  | RVCTNYMPY   | Consensus (ann/smm) | 0.64 |
| 953 | HLA-A*11:01 | orf1ab polyprotein | 591  | 600  | 10 | ATNNLVVMAY  | Consensus (ann/smm) | 0.64 |

|     |             |                    |      |      |    |             |                     |      |
|-----|-------------|--------------------|------|------|----|-------------|---------------------|------|
| 954 | HLA-A*11:01 | orf1ab polyprotein | 1646 | 1654 | 9  | YMSALNHTK   | Consensus (ann/smm) | 0.64 |
| 955 | HLA-A*11:01 | orf1ab polyprotein | 2407 | 2415 | 9  | STCMMCYKR   | Consensus (ann/smm) | 0.64 |
| 956 | HLA-A*11:01 | orf1ab polyprotein | 6602 | 6610 | 9  | GLQPSVGPK   | Consensus (ann/smm) | 0.64 |
| 957 | HLA-A*24:02 | orf1ab polyprotein | 1733 | 1741 | 9  | SYLFQHANL   | Consensus (ann/smm) | 0.64 |
| 958 | HLA-A*26:01 | orf1ab polyprotein | 2937 | 2945 | 9  | NVLEGSVAY   | Consensus (ann/smm) | 0.64 |
| 959 | HLA-A*26:01 | orf1ab polyprotein | 4657 | 4665 | 9  | YIKWDLKY    | Consensus (ann/smm) | 0.64 |
| 960 | HLA-A*31:01 | orf1ab polyprotein | 2327 | 2336 | 10 | WFLAYILFTR  | Consensus (ann/smm) | 0.64 |
| 961 | HLA-A*33:03 | orf1ab polyprotein | 218  | 226  | 9  | QLDFIDTKR   | netmhcpa_el         | 0.64 |
| 962 | HLA-A*33:03 | orf1ab polyprotein | 2749 | 2757 | 9  | QVVNVVTTK   | netmhcpa_el         | 0.64 |
| 963 | HLA-A*33:03 | orf1ab polyprotein | 6123 | 6130 | 8  | FVKIGPER    | netmhcpa_el         | 0.64 |
| 964 | HLA-A*33:03 | orf1ab polyprotein | 1210 | 1219 | 10 | EVKPFITESK  | netmhcpa_el         | 0.64 |
| 965 | HLA-A*33:03 | orf1ab polyprotein | 6121 | 6130 | 10 | KYFVKIGPER  | netmhcpa_el         | 0.64 |
| 966 | HLA-A*01:01 | orf1ab polyprotein | 4601 | 4609 | 9  | NQDLNGNWY   | Consensus (ann/smm) | 0.63 |
| 967 | HLA-A*01:01 | orf1ab polyprotein | 2888 | 2897 | 10 | VFSAVGNICY  | Consensus (ann/smm) | 0.63 |
| 968 | HLA-A*01:01 | orf1ab polyprotein | 3464 | 3472 | 9  | TVNVLAWLY   | Consensus (ann/smm) | 0.63 |
| 969 | HLA-A*01:01 | orf1ab polyprotein | 5297 | 5307 | 11 | VMLTNDNTSRY | Consensus (ann/smm) | 0.63 |
| 970 | HLA-A*01:01 | orf1ab polyprotein | 3463 | 3472 | 10 | ITVNVLAWLY  | Consensus (ann/smm) | 0.63 |
| 971 | HLA-A*02:01 | orf1ab polyprotein | 6160 | 6169 | 10 | YVYNPFMIDV  | Consensus (ann/smm) | 0.63 |
| 972 | HLA-A*02:01 | orf1ab polyprotein | 2383 | 2393 | 11 | MYIFFASFYYV | Consensus (ann/smm) | 0.63 |
| 973 | HLA-A*02:01 | orf1ab polyprotein | 5701 | 5710 | 10 | SMATNYDLSV  | Consensus (ann/smm) | 0.63 |
| 974 | HLA-A*02:06 | orf1ab polyprotein | 5213 | 5221 | 9  | KQGDDYVYL   | Consensus (ann/smm) | 0.63 |
| 975 | HLA-A*02:06 | orf1ab polyprotein | 6426 | 6435 | 10 | MISAGFSLWV  | Consensus (ann/smm) | 0.63 |
| 976 | HLA-A*02:06 | orf1ab polyprotein | 313  | 321  | 9  | NQMCLSTLM   | Consensus (ann/smm) | 0.63 |
| 977 | HLA-A*02:06 | orf1ab polyprotein | 1675 | 1683 | 9  | YLATALLTL   | Consensus (ann/smm) | 0.63 |
| 978 | HLA-A*03:01 | orf1ab polyprotein | 3710 | 3720 | 11 | TLMNVLTLYK  | Consensus (ann/smm) | 0.63 |
| 979 | HLA-A*03:01 | orf1ab polyprotein | 1090 | 1098 | 9  | YIATNGPLK   | Consensus (ann/smm) | 0.63 |
| 980 | HLA-A*03:01 | orf1ab polyprotein | 4957 | 4966 | 10 | TMTNRQFHQK  | Consensus (ann/smm) | 0.63 |
| 981 | HLA-A*11:01 | orf1ab polyprotein | 1519 | 1529 | 11 | QSTQLGIEFLK | Consensus (ann/smm) | 0.63 |
| 982 | HLA-A*11:01 | orf1ab polyprotein | 6759 | 6768 | 10 | KSQDLSVSK   | Consensus (ann/smm) | 0.63 |

|      |             |                    |      |      |    |             |                     |      |
|------|-------------|--------------------|------|------|----|-------------|---------------------|------|
| 983  | HLA-A*31:01 | orf1ab polyprotein | 4515 | 4524 | 10 | TMADLVYALR  | Consensus (ann/smm) | 0.63 |
| 984  | HLA-A*31:01 | orf1ab polyprotein | 7022 | 7030 | 9  | MHANYIFWR   | Consensus (ann/smm) | 0.63 |
| 985  | HLA-A*31:01 | orf1ab polyprotein | 1694 | 1703 | 10 | ALQDAYRRAR  | Consensus (ann/smm) | 0.63 |
| 986  | HLA-A*33:03 | orf1ab polyprotein | 1738 | 1746 | 9  | HANLDSCKR   | netmhcpa_el         | 0.63 |
| 987  | HLA-A*01:01 | orf1ab polyprotein | 1768 | 1776 | 9  | VMYMGTLSY   | Consensus (ann/smm) | 0.62 |
| 988  | HLA-A*01:01 | orf1ab polyprotein | 612  | 621  | 10 | WLTNIFGTVY  | Consensus (ann/smm) | 0.62 |
| 989  | HLA-A*01:01 | orf1ab polyprotein | 790  | 799  | 10 | LLEIKDTEKY  | Consensus (ann/smm) | 0.62 |
| 990  | HLA-A*02:06 | orf1ab polyprotein | 5059 | 5067 | 9  | VMCGGSLYV   | Consensus (ann/smm) | 0.62 |
| 991  | HLA-A*03:01 | orf1ab polyprotein | 829  | 837  | 9  | TVIEVQGYK   | Consensus (ann/smm) | 0.62 |
| 992  | HLA-A*03:01 | orf1ab polyprotein | 5533 | 5541 | 9  | VVYRGTTY    | Consensus (ann/smm) | 0.62 |
| 993  | HLA-A*03:01 | orf1ab polyprotein | 1646 | 1655 | 10 | YMSALNHTKK  | Consensus (ann/smm) | 0.62 |
| 994  | HLA-A*11:01 | orf1ab polyprotein | 5025 | 5033 | 9  | MASLVLARK   | Consensus (ann/smm) | 0.62 |
| 995  | HLA-A*26:01 | orf1ab polyprotein | 2782 | 2790 | 9  | FVAEIFYLI   | Consensus (ann/smm) | 0.62 |
| 996  | HLA-A*33:03 | orf1ab polyprotein | 2152 | 2159 | 8  | TTTNIVTR    | netmhcpa_el         | 0.62 |
| 997  | HLA-A*33:03 | orf1ab polyprotein | 3155 | 3164 | 10 | WFFSNYLKRR  | netmhcpa_el         | 0.62 |
| 998  | HLA-A*33:03 | orf1ab polyprotein | 5969 | 5978 | 10 | GIPKDMTYRR  | netmhcpa_el         | 0.62 |
| 999  | HLA-A*33:03 | orf1ab polyprotein | 6051 | 6060 | 10 | DTPNNTDFSR  | netmhcpa_el         | 0.62 |
| 1000 | HLA-A*01:01 | orf1ab polyprotein | 1669 | 1677 | 9  | WADNNCYLA   | Consensus (ann/smm) | 0.61 |
| 1001 | HLA-A*01:01 | orf1ab polyprotein | 591  | 600  | 10 | ATNNLVVMAY  | Consensus (ann/smm) | 0.61 |
| 1002 | HLA-A*01:01 | orf1ab polyprotein | 2272 | 2281 | 10 | NSTNVTIATY  | Consensus (ann/smm) | 0.61 |
| 1003 | HLA-A*01:01 | orf1ab polyprotein | 2668 | 2677 | 10 | DSCNNYMLTY  | Consensus (ann/smm) | 0.61 |
| 1004 | HLA-A*01:01 | orf1ab polyprotein | 4929 | 4938 | 10 | PTITQMNLKY  | Consensus (ann/smm) | 0.61 |
| 1005 | HLA-A*02:01 | orf1ab polyprotein | 3424 | 3434 | 11 | YMHHMELPTGV | Consensus (ann/smm) | 0.61 |
| 1006 | HLA-A*02:06 | orf1ab polyprotein | 6715 | 6723 | 9  | FELEDIPM    | Consensus (ann/smm) | 0.61 |
| 1007 | HLA-A*02:06 | orf1ab polyprotein | 1796 | 1805 | 10 | YLVQQESPFV  | Consensus (ann/smm) | 0.61 |
| 1008 | HLA-A*02:06 | orf1ab polyprotein | 4724 | 4733 | 10 | KIFVDGVPFV  | Consensus (ann/smm) | 0.61 |
| 1009 | HLA-A*02:06 | orf1ab polyprotein | 5470 | 5478 | 9  | KLSYGIATV   | Consensus (ann/smm) | 0.61 |
| 1010 | HLA-A*03:01 | orf1ab polyprotein | 2599 | 2608 | 10 | SSTFNVPMEK  | Consensus (ann/smm) | 0.61 |
| 1011 | HLA-A*11:01 | orf1ab polyprotein | 6385 | 6394 | 10 | VSDIDYVPLK  | Consensus (ann/smm) | 0.61 |

|      |             |                    |      |      |    |             |                                        |      |
|------|-------------|--------------------|------|------|----|-------------|----------------------------------------|------|
| 1012 | HLA-A*11:01 | orf1ab polyprotein | 1185 | 1194 | 10 | KLVSSFLEMK  | Consensus (ann/smm)                    | 0.61 |
| 1013 | HLA-A*11:01 | orf1ab polyprotein | 5899 | 5908 | 10 | IMSDRDLYDK  | Consensus (ann/smm)                    | 0.61 |
| 1014 | HLA-A*24:02 | orf1ab polyprotein | 2590 | 2598 | 9  | MFDAYVNTF   | Consensus (ann/smm)                    | 0.61 |
| 1015 | HLA-A*24:02 | orf1ab polyprotein | 3802 | 3810 | 9  | RYFRLTLGV   | Consensus (ann/smm)                    | 0.61 |
| 1016 | HLA-A*24:02 | orf1ab polyprotein | 6078 | 6086 | 9  | MYKGLPWNV   | Consensus (ann/smm)                    | 0.61 |
| 1017 | HLA-A*24:02 | orf1ab polyprotein | 7027 | 7035 | 9  | IFWRNTNPI   | Consensus (ann/smm)                    | 0.61 |
| 1018 | HLA-A*24:02 | orf1ab polyprotein | 3759 | 3769 | 11 | VFMCVEYCPHF | Consensus (ann/smm)                    | 0.61 |
| 1019 | HLA-A*26:01 | orf1ab polyprotein | 5569 | 5577 | 9  | HYVRITGLY   | Consensus (ann/smm)                    | 0.61 |
| 1020 | HLA-A*26:01 | orf1ab polyprotein | 2322 | 2331 | 10 | GLVAEWFLAY  | Consensus (ann/smm)                    | 0.61 |
| 1021 | HLA-A*31:01 | orf1ab polyprotein | 2411 | 2420 | 10 | MCKYRNRATR  | Consensus (ann/smm)                    | 0.61 |
| 1022 | HLA-A*31:01 | orf1ab polyprotein | 5110 | 5118 | 9  | KYVRNLQHR   | Consensus (ann/smm)                    | 0.61 |
| 1023 | HLA-A*31:01 | orf1ab polyprotein | 6441 | 6450 | 10 | TYNLWNTFTR  | Consensus (ann/smm)                    | 0.61 |
| 1024 | HLA-A*33:03 | orf1ab polyprotein | 1549 | 1557 | 9  | EVITFDNLK   | netmhcpa_el                            | 0.61 |
| 1025 | HLA-A*33:03 | orf1ab polyprotein | 5025 | 5033 | 9  | MASLVLARK   | netmhcpa_el                            | 0.61 |
| 1026 | HLA-A*33:03 | orf1ab polyprotein | 6514 | 6522 | 9  | NIKPVPEVK   | netmhcpa_el                            | 0.61 |
| 1027 | HLA-A*33:03 | orf1ab polyprotein | 4501 | 4508 | 8  | DMVPHISR    | netmhcpa_el                            | 0.61 |
| 1028 | HLA-A*33:03 | orf1ab polyprotein | 4229 | 4239 | 11 | YFIKGLNLLNR | netmhcpa_el                            | 0.61 |
| 1029 | HLA-A*33:03 | orf1ab polyprotein | 5504 | 5513 | 10 | YVFTGYRVTK  | netmhcpa_el                            | 0.61 |
| 1030 | HLA-A*01:01 | orf1ab polyprotein | 3814 | 3822 | 9  | LVSTQEFRY   | Consensus (ann/smm)                    | 0.6  |
| 1031 | HLA-A*01:01 | orf1ab polyprotein | 145  | 154  | 10 | LGDELGTDPY  | Consensus (ann/smm)                    | 0.6  |
| 1032 | HLA-A*02:01 | orf1ab polyprotein | 702  | 710  | 9  | ALNLGETFV   | Consensus (ann/comblib_sidney2008/smm) | 0.6  |
| 1033 | HLA-A*02:01 | orf1ab polyprotein | 1642 | 1650 | 9  | FLGRYMSAL   | Consensus (ann/comblib_sidney2008/smm) | 0.6  |
| 1034 | HLA-A*02:01 | orf1ab polyprotein | 3109 | 3117 | 9  | YLYLTFYLT   | Consensus (ann/comblib_sidney2008/smm) | 0.6  |
| 1035 | HLA-A*02:01 | orf1ab polyprotein | 3403 | 3411 | 9  | FLNGSCGSV   | Consensus (ann/comblib_sidney2008/smm) | 0.6  |
| 1036 | HLA-A*02:01 | orf1ab polyprotein | 3482 | 3490 | 9  | FLNRFITTL   | Consensus (ann/comblib_sidney2008/smm) | 0.6  |
| 1037 | HLA-A*02:01 | orf1ab polyprotein | 3598 | 3606 | 9  | TQWSLFFFL   | Consensus (ann/comblib_sidney2008/smm) | 0.6  |
| 1038 | HLA-A*02:01 | orf1ab polyprotein | 3662 | 3670 | 9  | RIMTWLDMV   | Consensus (ann/comblib_sidney2008/smm) | 0.6  |
| 1039 | HLA-A*02:01 | orf1ab polyprotein | 4699 | 4707 | 9  | ILHCANFNV   | Consensus (ann/comblib_sidney2008/smm) | 0.6  |
| 1040 | HLA-A*02:01 | orf1ab polyprotein | 5253 | 5261 | 9  | SLAIDAYPL   | Consensus (ann/comblib_sidney2008/smm) | 0.6  |

|      |             |                    |      |      |    |             |                                        |      |
|------|-------------|--------------------|------|------|----|-------------|----------------------------------------|------|
| 1041 | HLA-A*02:01 | orf1ab polyprotein | 6246 | 6254 | 9  | LLADKFPVL   | Consensus (ann/comblib_sidney2008/smm) | 0.6  |
| 1042 | HLA-A*02:01 | orf1ab polyprotein | 1985 | 1994 | 10 | LLHKPIVWHV  | Consensus (ann/smm)                    | 0.6  |
| 1043 | HLA-A*03:01 | orf1ab polyprotein | 1398 | 1407 | 10 | IVSTIQRKYK  | Consensus (ann/smm)                    | 0.6  |
| 1044 | HLA-A*03:01 | orf1ab polyprotein | 3142 | 3151 | 10 | IAYIICISTK  | Consensus (ann/smm)                    | 0.6  |
| 1045 | HLA-A*03:01 | orf1ab polyprotein | 5792 | 5801 | 10 | SAQCFKMFYK  | Consensus (ann/smm)                    | 0.6  |
| 1046 | HLA-A*11:01 | orf1ab polyprotein | 692  | 701  | 10 | SIIGGAKLK   | Consensus (ann/smm)                    | 0.6  |
| 1047 | HLA-A*11:01 | orf1ab polyprotein | 7041 | 7051 | 11 | SLFDMSKFPLK | Consensus (ann/smm)                    | 0.6  |
| 1048 | HLA-A*11:01 | orf1ab polyprotein | 313  | 322  | 10 | NQMCLSTLMK  | Consensus (ann/smm)                    | 0.6  |
| 1049 | HLA-A*11:01 | orf1ab polyprotein | 2920 | 2928 | 9  | TIFKDasGK   | Consensus (ann/smm)                    | 0.6  |
| 1050 | HLA-A*24:02 | orf1ab polyprotein | 2170 | 2179 | 10 | PYFFTLQL    | Consensus (ann/smm)                    | 0.6  |
| 1051 | HLA-A*24:02 | orf1ab polyprotein | 3602 | 3611 | 10 | LFFFLYENAF  | Consensus (ann/smm)                    | 0.6  |
| 1052 | HLA-A*24:02 | orf1ab polyprotein | 3787 | 3796 | 10 | GYFCTCYFGL  | Consensus (ann/smm)                    | 0.6  |
| 1053 | HLA-A*24:02 | orf1ab polyprotein | 6688 | 6697 | 10 | VYGDFSHSQL  | Consensus (ann/smm)                    | 0.6  |
| 1054 | HLA-A*26:01 | orf1ab polyprotein | 553  | 561  | 9  | ETAQNSVRV   | Consensus (ann/smm)                    | 0.6  |
| 1055 | HLA-A*26:01 | orf1ab polyprotein | 568  | 576  | 9  | TILDGISQY   | Consensus (ann/smm)                    | 0.6  |
| 1056 | HLA-A*26:01 | orf1ab polyprotein | 1478 | 1486 | 9  | SSPDAVTAY   | Consensus (ann/smm)                    | 0.6  |
| 1057 | HLA-A*26:01 | orf1ab polyprotein | 1022 | 1031 | 10 | TIEVNSFSGY  | Consensus (ann/smm)                    | 0.6  |
| 1058 | HLA-A*31:01 | orf1ab polyprotein | 1396 | 1404 | 9  | KAIVSTIQR   | Consensus (ann/smm)                    | 0.6  |
| 1059 | HLA-A*31:01 | orf1ab polyprotein | 2408 | 2417 | 10 | TCMNCYKRNR  | Consensus (ann/smm)                    | 0.6  |
| 1060 | HLA-A*31:01 | orf1ab polyprotein | 4840 | 4849 | 10 | AAISDYDYR   | Consensus (ann/smm)                    | 0.6  |
| 1061 | HLA-A*33:03 | orf1ab polyprotein | 5824 | 5832 | 9  | LTRNPAWRK   | netmhcpa_el                            | 0.6  |
| 1062 | HLA-A*33:03 | orf1ab polyprotein | 5503 | 5510 | 8  | NYVFTGYR    | netmhcpa_el                            | 0.6  |
| 1063 | HLA-A*33:03 | orf1ab polyprotein | 34   | 43   | 10 | SVEEVSEAR   | netmhcpa_el                            | 0.6  |
| 1064 | HLA-A*33:03 | orf1ab polyprotein | 6194 | 6203 | 10 | VASCDAIMTR  | netmhcpa_el                            | 0.6  |
| 1065 | HLA-A*01:01 | orf1ab polyprotein | 3774 | 3783 | 10 | NTLQCIMLVY  | Consensus (ann/smm)                    | 0.59 |
| 1066 | HLA-A*02:01 | orf1ab polyprotein | 6425 | 6435 | 11 | MMISAGFSLWV | Consensus (ann/smm)                    | 0.59 |
| 1067 | HLA-A*02:06 | orf1ab polyprotein | 2385 | 2393 | 9  | IFFASFYV    | Consensus (ann/smm)                    | 0.59 |
| 1068 | HLA-A*03:01 | orf1ab polyprotein | 2217 | 2225 | 9  | YLKSPNFSK   | Consensus (ann/smm)                    | 0.59 |
| 1069 | HLA-A*03:01 | orf1ab polyprotein | 38   | 47   | 10 | VLSEARQHLK  | Consensus (ann/smm)                    | 0.59 |

|      |             |                    |      |      |    |             |                     |      |
|------|-------------|--------------------|------|------|----|-------------|---------------------|------|
| 1070 | HLA-A*03:01 | orf1ab polyprotein | 119  | 129  | 11 | RKVLLRKNGNK | Consensus (ann/smm) | 0.59 |
| 1071 | HLA-A*11:01 | orf1ab polyprotein | 2913 | 2923 | 11 | CVLAAECTIFK | Consensus (ann/smm) | 0.59 |
| 1072 | HLA-A*11:01 | orf1ab polyprotein | 1103 | 1112 | 10 | CVLSGHNLAK  | Consensus (ann/smm) | 0.59 |
| 1073 | HLA-A*11:01 | orf1ab polyprotein | 4671 | 4680 | 10 | RLKLFDRYFK  | Consensus (ann/smm) | 0.59 |
| 1074 | HLA-A*24:02 | orf1ab polyprotein | 2381 | 2390 | 10 | VRMYIFFASF  | Consensus (ann/smm) | 0.59 |
| 1075 | HLA-A*26:01 | orf1ab polyprotein | 2551 | 2560 | 10 | ESSAKSASVY  | Consensus (ann/smm) | 0.59 |
| 1076 | HLA-A*33:03 | orf1ab polyprotein | 2503 | 2511 | 9  | LYFDKAGQK   | netmhcpa_el         | 0.59 |
| 1077 | HLA-A*33:03 | orf1ab polyprotein | 4673 | 4681 | 9  | KLFDYFYK    | netmhcpa_el         | 0.59 |
| 1078 | HLA-A*02:01 | orf1ab polyprotein | 3107 | 3116 | 10 | VIYLYLTFYL  | Consensus (ann/smm) | 0.58 |
| 1079 | HLA-A*02:06 | orf1ab polyprotein | 651  | 660  | 10 | FISTACEIV   | Consensus (ann/smm) | 0.58 |
| 1080 | HLA-A*03:01 | orf1ab polyprotein | 1874 | 1883 | 10 | TTTIKPVYK   | Consensus (ann/smm) | 0.58 |
| 1081 | HLA-A*11:01 | orf1ab polyprotein | 1270 | 1280 | 11 | LVSDIDITFLK | Consensus (ann/smm) | 0.58 |
| 1082 | HLA-A*11:01 | orf1ab polyprotein | 3    | 11   | 9  | SLVPGFNEK   | Consensus (ann/smm) | 0.58 |
| 1083 | HLA-A*11:01 | orf1ab polyprotein | 6293 | 6301 | 9  | YSYATHSDK   | Consensus (ann/smm) | 0.58 |
| 1084 | HLA-A*11:01 | orf1ab polyprotein | 5274 | 5282 | 9  | HLYLQYIRK   | Consensus (ann/smm) | 0.58 |
| 1085 | HLA-A*24:02 | orf1ab polyprotein | 3077 | 3085 | 9  | VVAFNTLLF   | Consensus (ann/smm) | 0.58 |
| 1086 | HLA-A*24:02 | orf1ab polyprotein | 5268 | 5277 | 10 | EYADVHLYL   | Consensus (ann/smm) | 0.58 |
| 1087 | HLA-A*26:01 | orf1ab polyprotein | 3103 | 3111 | 9  | GVYSVIYLY   | Consensus (ann/smm) | 0.58 |
| 1088 | HLA-A*26:01 | orf1ab polyprotein | 5467 | 5475 | 9  | ETFKLSYGI   | Consensus (ann/smm) | 0.58 |
| 1089 | HLA-A*26:01 | orf1ab polyprotein | 647  | 655  | 9  | EIVKFISTC   | Consensus (ann/smm) | 0.58 |
| 1090 | HLA-A*26:01 | orf1ab polyprotein | 6193 | 6201 | 9  | HVASCDAIM   | Consensus (ann/smm) | 0.58 |
| 1091 | HLA-A*26:01 | orf1ab polyprotein | 5974 | 5983 | 10 | MTYRRLISMM  | Consensus (ann/smm) | 0.58 |
| 1092 | HLA-A*33:03 | orf1ab polyprotein | 5883 | 5891 | 9  | NRFNVAITR   | netmhcpa_el         | 0.58 |
| 1093 | HLA-A*33:03 | orf1ab polyprotein | 6317 | 6325 | 9  | YPANSIVCR   | netmhcpa_el         | 0.58 |
| 1094 | HLA-A*01:01 | orf1ab polyprotein | 5073 | 5081 | 9  | SSGDATTAY   | Consensus (ann/smm) | 0.57 |
| 1095 | HLA-A*01:01 | orf1ab polyprotein | 5286 | 5295 | 10 | ELTGHMLDMY  | Consensus (ann/smm) | 0.57 |
| 1096 | HLA-A*02:01 | orf1ab polyprotein | 3582 | 3591 | 10 | WLLLILTSL   | Consensus (ann/smm) | 0.57 |
| 1097 | HLA-A*02:06 | orf1ab polyprotein | 6244 | 6253 | 10 | AALLADKFPV  | Consensus (ann/smm) | 0.57 |
| 1098 | HLA-A*03:01 | orf1ab polyprotein | 710  | 719  | 10 | VTSHKGLYRK  | Consensus (ann/smm) | 0.57 |

|      |             |                    |      |      |    |             |                     |      |
|------|-------------|--------------------|------|------|----|-------------|---------------------|------|
| 1099 | HLA-A*03:01 | orf1ab polyprotein | 2789 | 2798 | 10 | LITPVHVMSK  | Consensus (ann/smm) | 0.57 |
| 1100 | HLA-A*11:01 | orf1ab polyprotein | 1296 | 1304 | 9  | LTAVVIPTK   | Consensus (ann/smm) | 0.57 |
| 1101 | HLA-A*11:01 | orf1ab polyprotein | 675  | 684  | 10 | VQTFKLVNK   | Consensus (ann/smm) | 0.57 |
| 1102 | HLA-A*11:01 | orf1ab polyprotein | 4841 | 4849 | 9  | AISDYDYR    | Consensus (ann/smm) | 0.57 |
| 1103 | HLA-A*24:02 | orf1ab polyprotein | 6860 | 6868 | 9  | PYNMRVIHF   | Consensus (ann/smm) | 0.57 |
| 1104 | HLA-A*24:02 | orf1ab polyprotein | 3595 | 3603 | 9  | VQSTQWSLF   | Consensus (ann/smm) | 0.57 |
| 1105 | HLA-A*24:02 | orf1ab polyprotein | 3811 | 3820 | 10 | YDYLVTQEF   | Consensus (ann/smm) | 0.57 |
| 1106 | HLA-A*24:02 | orf1ab polyprotein | 4629 | 4639 | 11 | YSSLMPILTL  | Consensus (ann/smm) | 0.57 |
| 1107 | HLA-A*26:01 | orf1ab polyprotein | 4371 | 4379 | 9  | TVCGMWKGY   | Consensus (ann/smm) | 0.57 |
| 1108 | HLA-A*33:03 | orf1ab polyprotein | 4416 | 4425 | 10 | TGTSTDVVYR  | netmhcpa_el         | 0.57 |
| 1109 | HLA-A*01:01 | orf1ab polyprotein | 1415 | 1423 | 9  | VVDYGARFY   | Consensus (ann/smm) | 0.56 |
| 1110 | HLA-A*01:01 | orf1ab polyprotein | 3715 | 3723 | 9  | LTLVYKVVY   | Consensus (ann/smm) | 0.56 |
| 1111 | HLA-A*01:01 | orf1ab polyprotein | 5435 | 5444 | 10 | TCDWTNAGDY  | Consensus (ann/smm) | 0.56 |
| 1112 | HLA-A*01:01 | orf1ab polyprotein | 2483 | 2491 | 9  | PTDQSSYIV   | Consensus (ann/smm) | 0.56 |
| 1113 | HLA-A*02:01 | orf1ab polyprotein | 3111 | 3120 | 10 | YLTFYLTNDV  | Consensus (ann/smm) | 0.56 |
| 1114 | HLA-A*02:06 | orf1ab polyprotein | 4479 | 4488 | 10 | YNLLKDCPAV  | Consensus (ann/smm) | 0.56 |
| 1115 | HLA-A*02:06 | orf1ab polyprotein | 1984 | 1994 | 11 | KLLHKPIVWHV | Consensus (ann/smm) | 0.56 |
| 1116 | HLA-A*03:01 | orf1ab polyprotein | 1649 | 1657 | 9  | ALNHTKKWK   | Consensus (ann/smm) | 0.56 |
| 1117 | HLA-A*03:01 | orf1ab polyprotein | 2753 | 2761 | 9  | VVTTKIALK   | Consensus (ann/smm) | 0.56 |
| 1118 | HLA-A*03:01 | orf1ab polyprotein | 2790 | 2798 | 9  | ITPVHVMSK   | Consensus (ann/smm) | 0.56 |
| 1119 | HLA-A*03:01 | orf1ab polyprotein | 3620 | 3630 | 11 | AMSAFAMMFVK | Consensus (ann/smm) | 0.56 |
| 1120 | HLA-A*11:01 | orf1ab polyprotein | 484  | 492  | 9  | TSAFVETVK   | Consensus (ann/smm) | 0.56 |
| 1121 | HLA-A*11:01 | orf1ab polyprotein | 2753 | 2761 | 9  | VVTTKIALK   | Consensus (ann/smm) | 0.56 |
| 1122 | HLA-A*11:01 | orf1ab polyprotein | 4673 | 4680 | 8  | KLFDYFK     | Consensus (ann/smm) | 0.56 |
| 1123 | HLA-A*11:01 | orf1ab polyprotein | 2344 | 2353 | 10 | AAIMQLFFSY  | Consensus (ann/smm) | 0.56 |
| 1124 | HLA-A*24:02 | orf1ab polyprotein | 2244 | 2253 | 10 | IYSTAALGVL  | Consensus (ann/smm) | 0.56 |
| 1125 | HLA-A*24:02 | orf1ab polyprotein | 3149 | 3157 | 9  | STKHFWFF    | Consensus (ann/smm) | 0.56 |
| 1126 | HLA-A*24:02 | orf1ab polyprotein | 4847 | 4855 | 9  | YYRYNLPTM   | Consensus (ann/smm) | 0.56 |
| 1127 | HLA-A*24:02 | orf1ab polyprotein | 6107 | 6115 | 9  | VFVLWAHGF   | Consensus (ann/smm) | 0.56 |

|      |             |                    |      |      |    |             |                     |      |
|------|-------------|--------------------|------|------|----|-------------|---------------------|------|
| 1128 | HLA-A*26:01 | orf1ab polyprotein | 3304 | 3312 | 9  | HVICTSEDM   | Consensus (ann/smm) | 0.56 |
| 1129 | HLA-A*26:01 | orf1ab polyprotein | 4476 | 4484 | 9  | ETIYNLLKD   | Consensus (ann/smm) | 0.56 |
| 1130 | HLA-A*26:01 | orf1ab polyprotein | 1767 | 1776 | 10 | AVMYMGTLISY | Consensus (ann/smm) | 0.56 |
| 1131 | HLA-A*26:01 | orf1ab polyprotein | 2136 | 2145 | 10 | DTIANYAKPF  | Consensus (ann/smm) | 0.56 |
| 1132 | HLA-A*26:01 | orf1ab polyprotein | 4559 | 4567 | 9  | ENPDILRVY   | Consensus (ann/smm) | 0.56 |
| 1133 | HLA-A*26:01 | orf1ab polyprotein | 3135 | 3144 | 10 | LVPFWITIAY  | Consensus (ann/smm) | 0.56 |
| 1134 | HLA-A*31:01 | orf1ab polyprotein | 6316 | 6325 | 10 | RYPANSIVCR  | Consensus (ann/smm) | 0.56 |
| 1135 | HLA-A*31:01 | orf1ab polyprotein | 116  | 124  | 9  | VAYRKVLLR   | Consensus (ann/smm) | 0.56 |
| 1136 | HLA-A*33:03 | orf1ab polyprotein | 5981 | 5989 | 9  | SMMGFKMNY   | netmhcpa_el         | 0.56 |
| 1137 | HLA-A*33:03 | orf1ab polyprotein | 4143 | 4150 | 8  | ELSPVALR    | netmhcpa_el         | 0.56 |
| 1138 | HLA-A*33:03 | orf1ab polyprotein | 3217 | 3227 | 11 | FSGAMDTTSYR | netmhcpa_el         | 0.56 |
| 1139 | HLA-A*01:01 | orf1ab polyprotein | 5303 | 5313 | 11 | NTSRYWEPEFY | Consensus (ann/smm) | 0.55 |
| 1140 | HLA-A*01:01 | orf1ab polyprotein | 4648 | 4657 | 10 | HVDTDLTKPY  | Consensus (ann/smm) | 0.55 |
| 1141 | HLA-A*01:01 | orf1ab polyprotein | 5214 | 5223 | 10 | QGDDYVYLPY  | Consensus (ann/smm) | 0.55 |
| 1142 | HLA-A*01:01 | orf1ab polyprotein | 6427 | 6436 | 10 | ISAGFSLWVY  | Consensus (ann/smm) | 0.55 |
| 1143 | HLA-A*02:01 | orf1ab polyprotein | 6424 | 6433 | 10 | NMMISAGFSL  | Consensus (ann/smm) | 0.55 |
| 1144 | HLA-A*02:06 | orf1ab polyprotein | 6101 | 6109 | 9  | NLSDRVVFV   | Consensus (ann/smm) | 0.55 |
| 1145 | HLA-A*03:01 | orf1ab polyprotein | 1806 | 1814 | 9  | MMSAPPAQY   | Consensus (ann/smm) | 0.55 |
| 1146 | HLA-A*03:01 | orf1ab polyprotein | 5255 | 5263 | 9  | AIDAYPLTK   | Consensus (ann/smm) | 0.55 |
| 1147 | HLA-A*03:01 | orf1ab polyprotein | 6478 | 6486 | 9  | IINNTVYTK   | Consensus (ann/smm) | 0.55 |
| 1148 | HLA-A*11:01 | orf1ab polyprotein | 3710 | 3720 | 11 | TLMNVLTLVYK | Consensus (ann/smm) | 0.55 |
| 1149 | HLA-A*11:01 | orf1ab polyprotein | 1503 | 1512 | 10 | ETISLAGSYK  | Consensus (ann/smm) | 0.55 |
| 1150 | HLA-A*11:01 | orf1ab polyprotein | 4800 | 4809 | 10 | QTVKPGNFNK  | Consensus (ann/smm) | 0.55 |
| 1151 | HLA-A*11:01 | orf1ab polyprotein | 1172 | 1180 | 9  | NVYLAVFDK   | Consensus (ann/smm) | 0.55 |
| 1152 | HLA-A*11:01 | orf1ab polyprotein | 4434 | 4442 | 9  | VAGFAKFLK   | Consensus (ann/smm) | 0.55 |
| 1153 | HLA-A*26:01 | orf1ab polyprotein | 3780 | 3788 | 9  | MLVYCFLGY   | Consensus (ann/smm) | 0.55 |
| 1154 | HLA-A*26:01 | orf1ab polyprotein | 5140 | 5148 | 9  | YLRKHFSMM   | Consensus (ann/smm) | 0.55 |
| 1155 | HLA-A*26:01 | orf1ab polyprotein | 7001 | 7009 | 9  | EAFLLGCNY   | Consensus (ann/smm) | 0.55 |
| 1156 | HLA-A*26:01 | orf1ab polyprotein | 1827 | 1836 | 10 | YTGNYQCGHY  | Consensus (ann/smm) | 0.55 |

|      |             |                    |      |      |    |            |                     |      |
|------|-------------|--------------------|------|------|----|------------|---------------------|------|
| 1157 | HLA-A*31:01 | orf1ab polyprotein | 1557 | 1566 | 10 | KTLLSLREVR | Consensus (ann/smm) | 0.55 |
| 1158 | HLA-A*33:03 | orf1ab polyprotein | 5035 | 5043 | 9  | TCCCLSHR   | netmhcpa_el         | 0.55 |
| 1159 | HLA-A*33:03 | orf1ab polyprotein | 1619 | 1628 | 10 | YVLPNDTLR  | netmhcpa_el         | 0.55 |
| 1160 | HLA-A*33:03 | orf1ab polyprotein | 2216 | 2225 | 10 | NYLKSPNFSK | netmhcpa_el         | 0.55 |
| 1161 | HLA-A*33:03 | orf1ab polyprotein | 3552 | 3561 | 10 | DEFTPFDVVR | netmhcpa_el         | 0.55 |
| 1162 | HLA-A*33:03 | orf1ab polyprotein | 5527 | 5536 | 10 | GDYGDVVYR  | netmhcpa_el         | 0.55 |
| 1163 | HLA-A*02:06 | orf1ab polyprotein | 4266 | 4274 | 9  | VLSFAFAV   | Consensus (ann/smm) | 0.54 |
| 1164 | HLA-A*03:01 | orf1ab polyprotein | 1773 | 1781 | 9  | TLSYEQFKK  | Consensus (ann/smm) | 0.54 |
| 1165 | HLA-A*03:01 | orf1ab polyprotein | 5793 | 5801 | 9  | AQCFKMFYK  | Consensus (ann/smm) | 0.54 |
| 1166 | HLA-A*03:01 | orf1ab polyprotein | 5023 | 5032 | 10 | RIMASLVLAR | Consensus (ann/smm) | 0.54 |
| 1167 | HLA-A*11:01 | orf1ab polyprotein | 5964 | 5972 | 9  | CVDIPGIPK  | Consensus (ann/smm) | 0.54 |
| 1168 | HLA-A*24:02 | orf1ab polyprotein | 135  | 143  | 9  | SYGADLKSF  | Consensus (ann/smm) | 0.54 |
| 1169 | HLA-A*26:01 | orf1ab polyprotein | 3129 | 3138 | 10 | MVMFTPLVPF | Consensus (ann/smm) | 0.54 |
| 1170 | HLA-A*31:01 | orf1ab polyprotein | 4030 | 4038 | 9  | QTMLFTMLR  | Consensus (ann/smm) | 0.54 |
| 1171 | HLA-A*31:01 | orf1ab polyprotein | 3062 | 3069 | 8  | YYFMRFR    | ann                 | 0.54 |
| 1172 | HLA-A*33:03 | orf1ab polyprotein | 6504 | 6512 | 9  | NVAFELWAK  | netmhcpa_el         | 0.54 |
| 1173 | HLA-A*33:03 | orf1ab polyprotein | 3698 | 3707 | 10 | RTVYDDGARR | netmhcpa_el         | 0.54 |
| 1174 | HLA-A*33:03 | orf1ab polyprotein | 5488 | 5497 | 10 | HLSWEVGKPR | netmhcpa_el         | 0.54 |
| 1175 | HLA-A*01:01 | orf1ab polyprotein | 916  | 925  | 10 | LASHMYCSFY | Consensus (ann/smm) | 0.53 |
| 1176 | HLA-A*01:01 | orf1ab polyprotein | 5304 | 5313 | 10 | TSRYWEPEFY | Consensus (ann/smm) | 0.53 |
| 1177 | HLA-A*02:01 | orf1ab polyprotein | 5245 | 5254 | 10 | TLMIERFVSL | Consensus (ann/smm) | 0.53 |
| 1178 | HLA-A*02:01 | orf1ab polyprotein | 2332 | 2341 | 10 | ILFTRFFVVL | Consensus (ann/smm) | 0.53 |
| 1179 | HLA-A*03:01 | orf1ab polyprotein | 6960 | 6968 | 9  | ALGGSVAIK  | Consensus (ann/smm) | 0.53 |
| 1180 | HLA-A*03:01 | orf1ab polyprotein | 5166 | 5175 | 10 | GLVASIKNFK | Consensus (ann/smm) | 0.53 |
| 1181 | HLA-A*11:01 | orf1ab polyprotein | 2802 | 2810 | 9  | FSSEIIGYK  | Consensus (ann/smm) | 0.53 |
| 1182 | HLA-A*11:01 | orf1ab polyprotein | 5776 | 5784 | 9  | VSALVYDNK  | Consensus (ann/smm) | 0.53 |
| 1183 | HLA-A*11:01 | orf1ab polyprotein | 3219 | 3227 | 9  | GAMDTTSYR  | Consensus (ann/smm) | 0.53 |
| 1184 | HLA-A*24:02 | orf1ab polyprotein | 1417 | 1424 | 8  | DYGARFYF   | Consensus (ann/smm) | 0.53 |
| 1185 | HLA-A*24:02 | orf1ab polyprotein | 5137 | 5145 | 9  | FYAYLRKHF  | Consensus (ann/smm) | 0.53 |

|      |             |                    |      |      |    |             |                     |      |
|------|-------------|--------------------|------|------|----|-------------|---------------------|------|
| 1186 | HLA-A*24:02 | orf1ab polyprotein | 5394 | 5403 | 10 | YYCKSHKPPI  | Consensus (ann/smm) | 0.53 |
| 1187 | HLA-A*24:02 | orf1ab polyprotein | 5721 | 5729 | 9  | VYIGDPAQL   | Consensus (ann/smm) | 0.53 |
| 1188 | HLA-A*24:02 | orf1ab polyprotein | 1536 | 1545 | 10 | YYTSNPTTFH  | Consensus (ann/smm) | 0.53 |
| 1189 | HLA-A*26:01 | orf1ab polyprotein | 2305 | 2313 | 9  | ETIQITISS   | Consensus (ann/smm) | 0.53 |
| 1190 | HLA-A*26:01 | orf1ab polyprotein | 6623 | 6631 | 9  | AVKTQFNYY   | Consensus (ann/smm) | 0.53 |
| 1191 | HLA-A*31:01 | orf1ab polyprotein | 4966 | 4975 | 10 | KLLKSIATR   | Consensus (ann/smm) | 0.53 |
| 1192 | HLA-A*31:01 | orf1ab polyprotein | 7077 | 7085 | 9  | RLIIRENNR   | Consensus (ann/smm) | 0.53 |
| 1193 | HLA-A*33:03 | orf1ab polyprotein | 3198 | 3206 | 9  | LLPLTQYNR   | netmhcpa_el         | 0.53 |
| 1194 | HLA-A*33:03 | orf1ab polyprotein | 278  | 287  | 10 | NSIIKTIQPR  | netmhcpa_el         | 0.53 |
| 1195 | HLA-A*01:01 | orf1ab polyprotein | 2273 | 2281 | 9  | STNVTIATY   | Consensus (ann/smm) | 0.52 |
| 1196 | HLA-A*01:01 | orf1ab polyprotein | 1821 | 1831 | 11 | FTCASEYTGNY | Consensus (ann/smm) | 0.52 |
| 1197 | HLA-A*02:01 | orf1ab polyprotein | 3192 | 3201 | 10 | KLRSDVLLPL  | Consensus (ann/smm) | 0.52 |
| 1198 | HLA-A*02:01 | orf1ab polyprotein | 3639 | 3648 | 10 | FLLPSLATVA  | Consensus (ann/smm) | 0.52 |
| 1199 | HLA-A*02:06 | orf1ab polyprotein | 1214 | 1222 | 9  | FITESKPSV   | Consensus (ann/smm) | 0.52 |
| 1200 | HLA-A*02:06 | orf1ab polyprotein | 6659 | 6667 | 9  | SQMEIDFLE   | Consensus (ann/smm) | 0.52 |
| 1201 | HLA-A*03:01 | orf1ab polyprotein | 3669 | 3678 | 10 | MVDTSLSGFK  | Consensus (ann/smm) | 0.52 |
| 1202 | HLA-A*03:01 | orf1ab polyprotein | 4442 | 4451 | 10 | KTNCCRFQEK  | Consensus (ann/smm) | 0.52 |
| 1203 | HLA-A*03:01 | orf1ab polyprotein | 1311 | 1319 | 9  | EMLAKALRK   | Consensus (ann/smm) | 0.52 |
| 1204 | HLA-A*03:01 | orf1ab polyprotein | 2432 | 2442 | 11 | RSFYVYANGGK | Consensus (ann/smm) | 0.52 |
| 1205 | HLA-A*11:01 | orf1ab polyprotein | 1660 | 1668 | 9  | QVNGLTSIK   | Consensus (ann/smm) | 0.52 |
| 1206 | HLA-A*11:01 | orf1ab polyprotein | 2914 | 2923 | 10 | VLAAECTIFK  | Consensus (ann/smm) | 0.52 |
| 1207 | HLA-A*11:01 | orf1ab polyprotein | 3057 | 3066 | 10 | VTCLAYYFMR  | Consensus (ann/smm) | 0.52 |
| 1208 | HLA-A*11:01 | orf1ab polyprotein | 3184 | 3192 | 9  | LLNKEMYLK   | Consensus (ann/smm) | 0.52 |
| 1209 | HLA-A*24:02 | orf1ab polyprotein | 2672 | 2680 | 9  | NYMLTYNKV   | Consensus (ann/smm) | 0.52 |
| 1210 | HLA-A*24:02 | orf1ab polyprotein | 677  | 685  | 9  | TFFKLVNKF   | Consensus (ann/smm) | 0.52 |
| 1211 | HLA-A*24:02 | orf1ab polyprotein | 5576 | 5586 | 11 | LYPTLNISDEF | Consensus (ann/smm) | 0.52 |
| 1212 | HLA-A*26:01 | orf1ab polyprotein | 2594 | 2602 | 9  | YVNTFSSTF   | Consensus (ann/smm) | 0.52 |
| 1213 | HLA-A*26:01 | orf1ab polyprotein | 3022 | 3030 | 9  | DAVNLLTNM   | Consensus (ann/smm) | 0.52 |
| 1214 | HLA-A*26:01 | orf1ab polyprotein | 4978 | 4986 | 9  | TVVIGTSKF   | Consensus (ann/smm) | 0.52 |

|      |             |                    |      |      |    |             |                                        |      |
|------|-------------|--------------------|------|------|----|-------------|----------------------------------------|------|
| 1215 | HLA-A*31:01 | orf1ab polyprotein | 3004 | 3012 | 9  | WVLNNDYYR   | Consensus (ann/smm)                    | 0.52 |
| 1216 | HLA-A*01:01 | orf1ab polyprotein | 4866 | 4875 | 10 | EVVDKYFDCY  | Consensus (ann/smm)                    | 0.51 |
| 1217 | HLA-A*02:01 | orf1ab polyprotein | 3605 | 3614 | 10 | FLYENAFLPF  | Consensus (ann/smm)                    | 0.51 |
| 1218 | HLA-A*02:06 | orf1ab polyprotein | 2784 | 2793 | 10 | AAIFYLITPV  | Consensus (ann/smm)                    | 0.51 |
| 1219 | HLA-A*03:01 | orf1ab polyprotein | 2009 | 2017 | 9  | CIRCLWSTK   | Consensus (ann/smm)                    | 0.51 |
| 1220 | HLA-A*03:01 | orf1ab polyprotein | 4224 | 4232 | 9  | KVKYLYFIK   | Consensus (ann/smm)                    | 0.51 |
| 1221 | HLA-A*11:01 | orf1ab polyprotein | 1873 | 1883 | 11 | YTTTIKPVTYK | Consensus (ann/smm)                    | 0.51 |
| 1222 | HLA-A*24:02 | orf1ab polyprotein | 3619 | 3628 | 10 | IAMSAFAMMF  | Consensus (ann/smm)                    | 0.51 |
| 1223 | HLA-A*26:01 | orf1ab polyprotein | 1727 | 1736 | 10 | DVRETMSYLF  | Consensus (ann/smm)                    | 0.51 |
| 1224 | HLA-A*31:01 | orf1ab polyprotein | 6505 | 6513 | 9  | VAFELWAKR   | Consensus (ann/smm)                    | 0.51 |
| 1225 | HLA-A*31:01 | orf1ab polyprotein | 6625 | 6632 | 8  | KTQFNYYK    | ann                                    | 0.51 |
| 1226 | HLA-A*33:03 | orf1ab polyprotein | 808  | 816  | 9  | VTNNTFTLK   | netmhcpa_el                            | 0.51 |
| 1227 | HLA-A*33:03 | orf1ab polyprotein | 5818 | 5826 | 9  | GVVREFLTR   | netmhcpa_el                            | 0.51 |
| 1228 | HLA-A*33:03 | orf1ab polyprotein | 6078 | 6088 | 11 | MYKGLPWNVVR | netmhcpa_el                            | 0.51 |
| 1229 | HLA-A*01:01 | orf1ab polyprotein | 6298 | 6306 | 9  | HSDKFTDGV   | Consensus (ann/smm)                    | 0.5  |
| 1230 | HLA-A*01:01 | orf1ab polyprotein | 1477 | 1486 | 10 | VSSPDAVTAY  | Consensus (ann/smm)                    | 0.5  |
| 1231 | HLA-A*02:01 | orf1ab polyprotein | 6246 | 6253 | 8  | LLADKFPV    | Consensus (ann/smm)                    | 0.5  |
| 1232 | HLA-A*02:01 | orf1ab polyprotein | 84   | 92   | 9  | VMVELVAEL   | Consensus (ann/comblib_sidney2008/smm) | 0.5  |
| 1233 | HLA-A*02:01 | orf1ab polyprotein | 1148 | 1156 | 9  | LLSAGIFGA   | Consensus (ann/comblib_sidney2008/smm) | 0.5  |
| 1234 | HLA-A*02:01 | orf1ab polyprotein | 1278 | 1286 | 9  | FLKKDAPYI   | Consensus (ann/comblib_sidney2008/smm) | 0.5  |
| 1235 | HLA-A*02:01 | orf1ab polyprotein | 2569 | 2577 | 9  | ILLDQALV    | Consensus (ann/comblib_sidney2008/smm) | 0.5  |
| 1236 | HLA-A*02:01 | orf1ab polyprotein | 2782 | 2790 | 9  | FVAAIFYLI   | Consensus (ann/comblib_sidney2008/smm) | 0.5  |
| 1237 | HLA-A*02:01 | orf1ab polyprotein | 2785 | 2793 | 9  | AIFYLITPV   | Consensus (ann/comblib_sidney2008/smm) | 0.5  |
| 1238 | HLA-A*02:01 | orf1ab polyprotein | 3115 | 3123 | 9  | YLTNDVSFL   | Consensus (ann/comblib_sidney2008/smm) | 0.5  |
| 1239 | HLA-A*02:01 | orf1ab polyprotein | 3467 | 3475 | 9  | VLAWLYAAV   | Consensus (ann/comblib_sidney2008/smm) | 0.5  |
| 1240 | HLA-A*02:01 | orf1ab polyprotein | 3583 | 3591 | 9  | LLLTILTSL   | Consensus (ann/comblib_sidney2008/smm) | 0.5  |
| 1241 | HLA-A*02:01 | orf1ab polyprotein | 3587 | 3595 | 9  | ILTSLLVLV   | Consensus (ann/comblib_sidney2008/smm) | 0.5  |
| 1242 | HLA-A*02:01 | orf1ab polyprotein | 3753 | 3761 | 9  | FLARGIVFM   | Consensus (ann/comblib_sidney2008/smm) | 0.5  |
| 1243 | HLA-A*02:01 | orf1ab polyprotein | 3886 | 3894 | 9  | KLWAQCQVL   | Consensus (ann/comblib_sidney2008/smm) | 0.5  |

|      |             |                    |      |      |    |             |                                        |      |
|------|-------------|--------------------|------|------|----|-------------|----------------------------------------|------|
| 1244 | HLA-A*02:01 | orf1ab polyprotein | 5059 | 5067 | 9  | VMCGGSLYV   | Consensus (ann/comblib_sidney2008/smm) | 0.5  |
| 1245 | HLA-A*02:01 | orf1ab polyprotein | 5246 | 5254 | 9  | LMIERFVSL   | Consensus (ann/comblib_sidney2008/smm) | 0.5  |
| 1246 | HLA-A*02:01 | orf1ab polyprotein | 5291 | 5299 | 9  | MLDMYSVML   | Consensus (ann/comblib_sidney2008/smm) | 0.5  |
| 1247 | HLA-A*02:01 | orf1ab polyprotein | 5542 | 5550 | 9  | KLNVDYFV    | Consensus (ann/comblib_sidney2008/smm) | 0.5  |
| 1248 | HLA-A*02:01 | orf1ab polyprotein | 6101 | 6109 | 9  | NLSDRVVFV   | Consensus (ann/comblib_sidney2008/smm) | 0.5  |
| 1249 | HLA-A*02:01 | orf1ab polyprotein | 6425 | 6433 | 9  | MMISAGFSL   | Consensus (ann/comblib_sidney2008/smm) | 0.5  |
| 1250 | HLA-A*02:06 | orf1ab polyprotein | 679  | 688  | 10 | FKLVNKFLAL  | Consensus (ann/smm)                    | 0.5  |
| 1251 | HLA-A*03:01 | orf1ab polyprotein | 6865 | 6874 | 10 | VIHFGAGSDK  | Consensus (ann/smm)                    | 0.5  |
| 1252 | HLA-A*11:01 | orf1ab polyprotein | 613  | 623  | 11 | LTNIFGTVYEK | Consensus (ann/smm)                    | 0.5  |
| 1253 | HLA-A*11:01 | orf1ab polyprotein | 5504 | 5513 | 10 | YVFTGYRVTK  | Consensus (ann/smm)                    | 0.5  |
| 1254 | HLA-A*11:01 | orf1ab polyprotein | 314  | 322  | 9  | QMCLSTLMK   | Consensus (ann/smm)                    | 0.5  |
| 1255 | HLA-A*11:01 | orf1ab polyprotein | 1773 | 1781 | 9  | TLSYEQFKK   | Consensus (ann/smm)                    | 0.5  |
| 1256 | HLA-A*24:02 | orf1ab polyprotein | 3249 | 3257 | 9  | LYQPQTSI    | Consensus (ann/smm)                    | 0.5  |
| 1257 | HLA-A*33:03 | orf1ab polyprotein | 236  | 244  | 9  | HEIAWYTER   | netmhcpa_el                            | 0.5  |
| 1258 | HLA-A*33:03 | orf1ab polyprotein | 2374 | 2382 | 9  | MAPISAMVR   | netmhcpa_el                            | 0.5  |
| 1259 | HLA-A*33:03 | orf1ab polyprotein | 3360 | 3368 | 9  | KTPKYKFVR   | netmhcpa_el                            | 0.5  |
| 1260 | HLA-A*33:03 | orf1ab polyprotein | 3472 | 3480 | 9  | YAAVINGDR   | netmhcpa_el                            | 0.5  |
| 1261 | HLA-A*33:03 | orf1ab polyprotein | 5445 | 5453 | 9  | ILANTCTER   | netmhcpa_el                            | 0.5  |
| 1262 | HLA-A*33:03 | orf1ab polyprotein | 5798 | 5806 | 9  | MFYKGVITH   | netmhcpa_el                            | 0.5  |
| 1263 | HLA-A*33:03 | orf1ab polyprotein | 7022 | 7030 | 9  | MHANYIFWR   | netmhcpa_el                            | 0.5  |
| 1264 | HLA-A*33:03 | orf1ab polyprotein | 7023 | 7030 | 8  | HANYIFWR    | netmhcpa_el                            | 0.5  |
| 1265 | HLA-A*33:03 | orf1ab polyprotein | 2519 | 2528 | 10 | SHFVNLDNLR  | netmhcpa_el                            | 0.5  |
| 1266 | HLA-A*33:03 | orf1ab polyprotein | 4813 | 4822 | 10 | DFAVSKGFFK  | netmhcpa_el                            | 0.5  |
| 1267 | HLA-A*33:03 | orf1ab polyprotein | 5875 | 5884 | 10 | ETAHSCNVNR  | netmhcpa_el                            | 0.5  |
| 1268 | HLA-A*01:01 | orf1ab polyprotein | 5450 | 5458 | 9  | CTERLKLFA   | Consensus (ann/smm)                    | 0.49 |
| 1269 | HLA-A*01:01 | orf1ab polyprotein | 2905 | 2913 | 9  | YTDFATSAC   | Consensus (ann/smm)                    | 0.49 |
| 1270 | HLA-A*01:01 | orf1ab polyprotein | 1247 | 1256 | 10 | KFLTENLLLY  | Consensus (ann/smm)                    | 0.49 |
| 1271 | HLA-A*01:01 | orf1ab polyprotein | 3207 | 3216 | 10 | YLALYNKYKY  | Consensus (ann/smm)                    | 0.49 |
| 1272 | HLA-A*02:06 | orf1ab polyprotein | 3605 | 3614 | 10 | FLYENAFLPF  | Consensus (ann/smm)                    | 0.49 |

|      |             |                    |      |      |    |             |                     |      |
|------|-------------|--------------------|------|------|----|-------------|---------------------|------|
| 1273 | HLA-A*02:06 | orf1ab polyprotein | 5630 | 5638 | 9  | YTACSHAAV   | Consensus (ann/smm) | 0.49 |
| 1274 | HLA-A*03:01 | orf1ab polyprotein | 1561 | 1569 | 9  | SLREVRTIK   | Consensus (ann/smm) | 0.49 |
| 1275 | HLA-A*03:01 | orf1ab polyprotein | 5167 | 5175 | 9  | LVASIKNFK   | Consensus (ann/smm) | 0.49 |
| 1276 | HLA-A*11:01 | orf1ab polyprotein | 5392 | 5400 | 9  | MSYYCKSHK   | Consensus (ann/smm) | 0.49 |
| 1277 | HLA-A*11:01 | orf1ab polyprotein | 1175 | 1185 | 11 | LAVFDKNLYDK | Consensus (ann/smm) | 0.49 |
| 1278 | HLA-A*11:01 | orf1ab polyprotein | 5517 | 5526 | 10 | VQIGEYTFEK  | Consensus (ann/smm) | 0.49 |
| 1279 | HLA-A*11:01 | orf1ab polyprotein | 2977 | 2985 | 9  | TTFDSEYCR   | Consensus (ann/smm) | 0.49 |
| 1280 | HLA-A*11:01 | orf1ab polyprotein | 5518 | 5526 | 9  | QIGEYTFEK   | Consensus (ann/smm) | 0.49 |
| 1281 | HLA-A*24:02 | orf1ab polyprotein | 6775 | 6783 | 9  | DYTEISFML   | Consensus (ann/smm) | 0.49 |
| 1282 | HLA-A*24:02 | orf1ab polyprotein | 1970 | 1979 | 10 | IDYKHYTPSF  | Consensus (ann/smm) | 0.49 |
| 1283 | HLA-A*26:01 | orf1ab polyprotein | 2136 | 2144 | 9  | DTIANYAKP   | Consensus (ann/smm) | 0.49 |
| 1284 | HLA-A*26:01 | orf1ab polyprotein | 1637 | 1646 | 10 | TTDPSFLGRY  | Consensus (ann/smm) | 0.49 |
| 1285 | HLA-A*26:01 | orf1ab polyprotein | 4264 | 4272 | 9  | STVLSFCAF   | Consensus (ann/smm) | 0.49 |
| 1286 | HLA-A*33:03 | orf1ab polyprotein | 3534 | 3542 | 9  | LLQNGMNGR   | netmhcpa_el         | 0.49 |
| 1287 | HLA-A*33:03 | orf1ab polyprotein | 4045 | 4053 | 9  | LNNIINNAR   | netmhcpa_el         | 0.49 |
| 1288 | HLA-A*33:03 | orf1ab polyprotein | 4939 | 4947 | 9  | AISAKNRAR   | netmhcpa_el         | 0.49 |
| 1289 | HLA-A*33:03 | orf1ab polyprotein | 5039 | 5046 | 8  | SLSHRFYR    | netmhcpa_el         | 0.49 |
| 1290 | HLA-A*33:03 | orf1ab polyprotein | 6643 | 6650 | 8  | ETYFTQSR    | netmhcpa_el         | 0.49 |
| 1291 | HLA-A*33:03 | orf1ab polyprotein | 4896 | 4905 | 10 | FPFNKWGKAR  | netmhcpa_el         | 0.49 |
| 1292 | HLA-A*33:03 | orf1ab polyprotein | 6855 | 6864 | 10 | LTLAVPYNMR  | netmhcpa_el         | 0.49 |
| 1293 | HLA-A*33:03 | orf1ab polyprotein | 6875 | 6884 | 10 | GVAPGTAVLR  | netmhcpa_el         | 0.49 |
| 1294 | HLA-A*01:01 | orf1ab polyprotein | 3217 | 3226 | 10 | FSGAMDTSY   | Consensus (ann/smm) | 0.48 |
| 1295 | HLA-A*01:01 | orf1ab polyprotein | 6268 | 6276 | 9  | QADVEWKFY   | Consensus (ann/smm) | 0.48 |
| 1296 | HLA-A*01:01 | orf1ab polyprotein | 611  | 621  | 11 | QWLTNIFGTVY | Consensus (ann/smm) | 0.48 |
| 1297 | HLA-A*02:01 | orf1ab polyprotein | 1444 | 1453 | 10 | TLVTMPLGYV  | Consensus (ann/smm) | 0.48 |
| 1298 | HLA-A*02:06 | orf1ab polyprotein | 641  | 649  | 9  | FLRDGWEIV   | Consensus (ann/smm) | 0.48 |
| 1299 | HLA-A*02:06 | orf1ab polyprotein | 3621 | 3629 | 9  | MSAFAMMFV   | Consensus (ann/smm) | 0.48 |
| 1300 | HLA-A*02:06 | orf1ab polyprotein | 5133 | 5141 | 9  | FVNEFYAYL   | Consensus (ann/smm) | 0.48 |
| 1301 | HLA-A*02:06 | orf1ab polyprotein | 6108 | 6117 | 10 | FVLWAHGFEI  | Consensus (ann/smm) | 0.48 |

|      |             |                    |      |      |    |             |                     |      |
|------|-------------|--------------------|------|------|----|-------------|---------------------|------|
| 1302 | HLA-A*03:01 | orf1ab polyprotein | 5343 | 5352 | 10 | CIRRPFLCCK  | Consensus (ann/smm) | 0.48 |
| 1303 | HLA-A*11:01 | orf1ab polyprotein | 49   | 58   | 10 | GTCGLVEVEK  | Consensus (ann/smm) | 0.48 |
| 1304 | HLA-A*11:01 | orf1ab polyprotein | 5205 | 5213 | 9  | CSQHTMLVK   | Consensus (ann/smm) | 0.48 |
| 1305 | HLA-A*11:01 | orf1ab polyprotein | 6554 | 6562 | 9  | CSMTDIAKK   | Consensus (ann/smm) | 0.48 |
| 1306 | HLA-A*26:01 | orf1ab polyprotein | 5614 | 5622 | 9  | HFAIGLALY   | Consensus (ann/smm) | 0.48 |
| 1307 | HLA-A*26:01 | orf1ab polyprotein | 6434 | 6442 | 9  | WVYKQFDY    | Consensus (ann/smm) | 0.48 |
| 1308 | HLA-A*26:01 | orf1ab polyprotein | 1205 | 1214 | 10 | EIPKEEVKPF  | Consensus (ann/smm) | 0.48 |
| 1309 | HLA-A*31:01 | orf1ab polyprotein | 4958 | 4966 | 9  | MTNRQFHQK   | Consensus (ann/smm) | 0.48 |
| 1310 | HLA-A*33:03 | orf1ab polyprotein | 3330 | 3339 | 10 | LVQAGNVQLR  | netmhcpa_el         | 0.48 |
| 1311 | HLA-A*01:01 | orf1ab polyprotein | 4511 | 4521 | 11 | LTKYTMADLVY | Consensus (ann/smm) | 0.47 |
| 1312 | HLA-A*01:01 | orf1ab polyprotein | 1443 | 1452 | 10 | ETLVTMPLGY  | Consensus (ann/smm) | 0.47 |
| 1313 | HLA-A*02:01 | orf1ab polyprotein | 2168 | 2177 | 10 | YMPYFFLLL   | Consensus (ann/smm) | 0.47 |
| 1314 | HLA-A*02:01 | orf1ab polyprotein | 2229 | 2238 | 10 | IIIWFLLSV   | Consensus (ann/smm) | 0.47 |
| 1315 | HLA-A*02:06 | orf1ab polyprotein | 2785 | 2793 | 9  | AIFYLITPV   | Consensus (ann/smm) | 0.47 |
| 1316 | HLA-A*03:01 | orf1ab polyprotein | 3107 | 3115 | 9  | VIYLYLTFY   | Consensus (ann/smm) | 0.47 |
| 1317 | HLA-A*03:01 | orf1ab polyprotein | 7038 | 7047 | 10 | SSYSLFDMSK  | Consensus (ann/smm) | 0.47 |
| 1318 | HLA-A*11:01 | orf1ab polyprotein | 5023 | 5033 | 11 | RIMASLVLARK | Consensus (ann/smm) | 0.47 |
| 1319 | HLA-A*11:01 | orf1ab polyprotein | 3834 | 3843 | 10 | SIDAFKLNK   | Consensus (ann/smm) | 0.47 |
| 1320 | HLA-A*11:01 | orf1ab polyprotein | 273  | 282  | 10 | FVFPLNSIK   | Consensus (ann/smm) | 0.47 |
| 1321 | HLA-A*11:01 | orf1ab polyprotein | 3259 | 3268 | 10 | SAVLQSGFRK  | Consensus (ann/smm) | 0.47 |
| 1322 | HLA-A*24:02 | orf1ab polyprotein | 4629 | 4637 | 9  | YYSLLMPIL   | Consensus (ann/smm) | 0.47 |
| 1323 | HLA-A*24:02 | orf1ab polyprotein | 2436 | 2444 | 9  | VYANGGKGF   | Consensus (ann/smm) | 0.47 |
| 1324 | HLA-A*24:02 | orf1ab polyprotein | 4628 | 4637 | 10 | SYYSLLMPIL  | Consensus (ann/smm) | 0.47 |
| 1325 | HLA-A*24:02 | orf1ab polyprotein | 3206 | 3214 | 9  | RYLALYNKY   | Consensus (ann/smm) | 0.47 |
| 1326 | HLA-A*24:02 | orf1ab polyprotein | 3788 | 3797 | 10 | YFCTCYGLF   | Consensus (ann/smm) | 0.47 |
| 1327 | HLA-A*26:01 | orf1ab polyprotein | 5974 | 5982 | 9  | MTYRRLISM   | Consensus (ann/smm) | 0.47 |
| 1328 | HLA-A*26:01 | orf1ab polyprotein | 1891 | 1900 | 10 | EIDPKLDNYY  | Consensus (ann/smm) | 0.47 |
| 1329 | HLA-A*33:03 | orf1ab polyprotein | 1396 | 1404 | 9  | KAIVSTIQR   | netmhcpa_el         | 0.47 |
| 1330 | HLA-A*33:03 | orf1ab polyprotein | 543  | 550  | 8  | VVRSIFSR    | netmhcpa_el         | 0.47 |

|      |             |                    |      |      |    |              |                     |      |
|------|-------------|--------------------|------|------|----|--------------|---------------------|------|
| 1331 | HLA-A*33:03 | orf1ab polyprotein | 3471 | 3480 | 10 | LYAAVINGDR   | netmhcpa_el         | 0.47 |
| 1332 | HLA-A*33:03 | orf1ab polyprotein | 4401 | 4410 | 10 | NRVCGVSAAR   | netmhcpa_el         | 0.47 |
| 1333 | HLA-A*01:01 | orf1ab polyprotein | 3181 | 3190 | 10 | CTFLLNKEMY   | Consensus (ann/smm) | 0.46 |
| 1334 | HLA-A*03:01 | orf1ab polyprotein | 1057 | 1066 | 10 | VVNAANVYLK   | Consensus (ann/smm) | 0.46 |
| 1335 | HLA-A*03:01 | orf1ab polyprotein | 3710 | 3719 | 10 | TLMNVLTLY    | Consensus (ann/smm) | 0.46 |
| 1336 | HLA-A*03:01 | orf1ab polyprotein | 4368 | 4377 | 10 | TVCTVCGMWK   | Consensus (ann/smm) | 0.46 |
| 1337 | HLA-A*03:01 | orf1ab polyprotein | 6623 | 6632 | 10 | AVKTQFNYYK   | Consensus (ann/smm) | 0.46 |
| 1338 | HLA-A*11:01 | orf1ab polyprotein | 4071 | 4081 | 11 | MVVIPDYNTYK  | Consensus (ann/smm) | 0.46 |
| 1339 | HLA-A*11:01 | orf1ab polyprotein | 6427 | 6437 | 11 | ISAGFSLWVYK  | Consensus (ann/smm) | 0.46 |
| 1340 | HLA-A*11:01 | orf1ab polyprotein | 1387 | 1396 | 10 | KLMPVCVETK   | Consensus (ann/smm) | 0.46 |
| 1341 | HLA-A*11:01 | orf1ab polyprotein | 4977 | 4985 | 9  | ATVVIKTSK    | Consensus (ann/smm) | 0.46 |
| 1342 | HLA-A*11:01 | orf1ab polyprotein | 4073 | 4081 | 9  | VIPDYNTYK    | Consensus (ann/smm) | 0.46 |
| 1343 | HLA-A*24:02 | orf1ab polyprotein | 3722 | 3731 | 10 | YYGNALDQAI   | Consensus (ann/smm) | 0.46 |
| 1344 | HLA-A*24:02 | orf1ab polyprotein | 4548 | 4557 | 10 | YFNKKDWYDF   | Consensus (ann/smm) | 0.46 |
| 1345 | HLA-A*24:02 | orf1ab polyprotein | 3658 | 3666 | 9  | SWVMRIMTW    | Consensus (ann/smm) | 0.46 |
| 1346 | HLA-A*24:02 | orf1ab polyprotein | 6844 | 6852 | 9  | KYTQLCQYL    | Consensus (ann/smm) | 0.46 |
| 1347 | HLA-A*26:01 | orf1ab polyprotein | 1766 | 1774 | 9  | EAVMYMGTL    | Consensus (ann/smm) | 0.46 |
| 1348 | HLA-A*26:01 | orf1ab polyprotein | 2246 | 2254 | 9  | STAALGVLM    | Consensus (ann/smm) | 0.46 |
| 1349 | HLA-A*26:01 | orf1ab polyprotein | 2468 | 2476 | 9  | EVARDLSLQ    | Consensus (ann/smm) | 0.46 |
| 1350 | HLA-A*31:01 | orf1ab polyprotein | 5999 | 6009 | 11 | ITREEAIRHVR  | Consensus (ann/smm) | 0.46 |
| 1351 | HLA-A*31:01 | orf1ab polyprotein | 3003 | 3012 | 10 | RWVLNNDYYR   | Consensus (ann/smm) | 0.46 |
| 1352 | HLA-A*31:01 | orf1ab polyprotein | 4029 | 4038 | 10 | MQTMLFTMLR   | Consensus (ann/smm) | 0.46 |
| 1353 | HLA-A*31:01 | orf1ab polyprotein | 4490 | 4497 | 8  | KHDFKFR      | ann                 | 0.46 |
| 1354 | HLA-A*31:01 | orf1ab polyprotein | 7023 | 7030 | 8  | HANYIFWR     | ann                 | 0.46 |
| 1355 | HLA-A*33:03 | orf1ab polyprotein | 2217 | 2225 | 9  | YLKSPNFSK    | netmhcpa_el         | 0.46 |
| 1356 | HLA-A*33:03 | orf1ab polyprotein | 5173 | 5181 | 9  | NFKSVLYYQ    | netmhcpa_el         | 0.46 |
| 1357 | HLA-A*33:03 | orf1ab polyprotein | 5911 | 5919 | 9  | FTSLEIPRR    | netmhcpa_el         | 0.46 |
| 1358 | HLA-A*33:03 | orf1ab polyprotein | 7077 | 7085 | 9  | RLIIRENNR    | netmhcpa_el         | 0.46 |
| 1359 | HLA-A*33:03 | orf1ab polyprotein | 1394 | 1404 | 11 | ETKAIIVSTIQR | netmhcpa_el         | 0.46 |

|      |             |                    |      |      |    |              |                     |      |
|------|-------------|--------------------|------|------|----|--------------|---------------------|------|
| 1360 | HLA-A*33:03 | orf1ab polyprotein | 3441 | 3451 | 11 | EGNFYGPVFVDR | netmhcpa_el         | 0.46 |
| 1361 | HLA-A*33:03 | orf1ab polyprotein | 1944 | 1953 | 10 | LTGYKKPASR   | netmhcpa_el         | 0.46 |
| 1362 | HLA-A*01:01 | orf1ab polyprotein | 5615 | 5623 | 9  | FAIGLALYY    | Consensus (ann/smm) | 0.45 |
| 1363 | HLA-A*01:01 | orf1ab polyprotein | 917  | 925  | 9  | ASHMYCSFY    | Consensus (ann/smm) | 0.45 |
| 1364 | HLA-A*02:06 | orf1ab polyprotein | 3586 | 3595 | 10 | TILTSLLVLV   | Consensus (ann/smm) | 0.45 |
| 1365 | HLA-A*02:06 | orf1ab polyprotein | 480  | 488  | 9  | FSASTSAFV    | Consensus (ann/smm) | 0.45 |
| 1366 | HLA-A*02:06 | orf1ab polyprotein | 3083 | 3091 | 9  | LLFLMSFTV    | Consensus (ann/smm) | 0.45 |
| 1367 | HLA-A*02:06 | orf1ab polyprotein | 5228 | 5236 | 9  | RILGAGCFV    | Consensus (ann/smm) | 0.45 |
| 1368 | HLA-A*03:01 | orf1ab polyprotein | 5273 | 5282 | 10 | FHLYLQYIRK   | Consensus (ann/smm) | 0.45 |
| 1369 | HLA-A*03:01 | orf1ab polyprotein | 4757 | 4766 | 10 | RLSFKELLY    | Consensus (ann/smm) | 0.45 |
| 1370 | HLA-A*11:01 | orf1ab polyprotein | 4715 | 4724 | 10 | PTSGPLVRK    | Consensus (ann/smm) | 0.45 |
| 1371 | HLA-A*24:02 | orf1ab polyprotein | 4461 | 4469 | 9  | YFVVKRHTF    | Consensus (ann/smm) | 0.45 |
| 1372 | HLA-A*31:01 | orf1ab polyprotein | 710  | 718  | 9  | VTHSKGLYR    | Consensus (ann/smm) | 0.45 |
| 1373 | HLA-A*31:01 | orf1ab polyprotein | 5133 | 5142 | 10 | FVNEFYAYLR   | Consensus (ann/smm) | 0.45 |
| 1374 | HLA-A*31:01 | orf1ab polyprotein | 4439 | 4447 | 9  | KFLKTNCCR    | Consensus (ann/smm) | 0.45 |
| 1375 | HLA-A*33:03 | orf1ab polyprotein | 16   | 24   | 9  | LSPVLQVR     | netmhcpa_el         | 0.45 |
| 1376 | HLA-A*33:03 | orf1ab polyprotein | 1378 | 1386 | 9  | MLAHAEETR    | netmhcpa_el         | 0.45 |
| 1377 | HLA-A*33:03 | orf1ab polyprotein | 2718 | 2726 | 9  | FMSLSEQLR    | netmhcpa_el         | 0.45 |
| 1378 | HLA-A*33:03 | orf1ab polyprotein | 5563 | 5572 | 10 | TLVPQEHYVR   | netmhcpa_el         | 0.45 |
| 1379 | HLA-A*02:06 | orf1ab polyprotein | 3098 | 3107 | 10 | YSFLPGVYSV   | Consensus (ann/smm) | 0.44 |
| 1380 | HLA-A*11:01 | orf1ab polyprotein | 3106 | 3115 | 10 | SVIYLYLTFY   | Consensus (ann/smm) | 0.44 |
| 1381 | HLA-A*11:01 | orf1ab polyprotein | 2790 | 2798 | 9  | ITPVHVMSK    | Consensus (ann/smm) | 0.44 |
| 1382 | HLA-A*11:01 | orf1ab polyprotein | 5167 | 5175 | 9  | LVASIKNFK    | Consensus (ann/smm) | 0.44 |
| 1383 | HLA-A*24:02 | orf1ab polyprotein | 7020 | 7028 | 9  | YVMHANYIF    | Consensus (ann/smm) | 0.44 |
| 1384 | HLA-A*26:01 | orf1ab polyprotein | 4272 | 4280 | 9  | FAVDAAKAY    | Consensus (ann/smm) | 0.44 |
| 1385 | HLA-A*33:03 | orf1ab polyprotein | 3062 | 3069 | 8  | YFMRFR       | netmhcpa_el         | 0.44 |
| 1386 | HLA-A*33:03 | orf1ab polyprotein | 708  | 718  | 11 | TFVTHSKGLYR  | netmhcpa_el         | 0.44 |
| 1387 | HLA-A*33:03 | orf1ab polyprotein | 5881 | 5891 | 11 | NVNRFNVAITR  | netmhcpa_el         | 0.44 |
| 1388 | HLA-A*01:01 | orf1ab polyprotein | 2235 | 2245 | 11 | LLSVCLGSLIY  | Consensus (ann/smm) | 0.43 |

|      |             |                    |      |      |    |             |                     |      |
|------|-------------|--------------------|------|------|----|-------------|---------------------|------|
| 1389 | HLA-A*01:01 | orf1ab polyprotein | 896  | 906  | 11 | DLDEWSMATYY | Consensus (ann/smm) | 0.43 |
| 1390 | HLA-A*01:01 | orf1ab polyprotein | 3201 | 3211 | 11 | LTQYNRYLALY | Consensus (ann/smm) | 0.43 |
| 1391 | HLA-A*02:06 | orf1ab polyprotein | 825  | 833  | 9  | FGDDTVIEV   | Consensus (ann/smm) | 0.43 |
| 1392 | HLA-A*02:06 | orf1ab polyprotein | 3662 | 3670 | 9  | RIMTWLDMV   | Consensus (ann/smm) | 0.43 |
| 1393 | HLA-A*02:06 | orf1ab polyprotein | 2229 | 2238 | 10 | IIIWFLLLSV  | Consensus (ann/smm) | 0.43 |
| 1394 | HLA-A*02:06 | orf1ab polyprotein | 6425 | 6433 | 9  | MMISAGFSL   | Consensus (ann/smm) | 0.43 |
| 1395 | HLA-A*03:01 | orf1ab polyprotein | 2719 | 2727 | 9  | MSLSEQLRK   | Consensus (ann/smm) | 0.43 |
| 1396 | HLA-A*03:01 | orf1ab polyprotein | 2139 | 2148 | 10 | ANYAKPFLNK  | Consensus (ann/smm) | 0.43 |
| 1397 | HLA-A*03:01 | orf1ab polyprotein | 4985 | 4995 | 11 | KFYGGWHNMLK | Consensus (ann/smm) | 0.43 |
| 1398 | HLA-A*11:01 | orf1ab polyprotein | 674  | 684  | 11 | SVQTFKLVNK  | Consensus (ann/smm) | 0.43 |
| 1399 | HLA-A*11:01 | orf1ab polyprotein | 5532 | 5542 | 11 | AVVYRGTTTYK | Consensus (ann/smm) | 0.43 |
| 1400 | HLA-A*11:01 | orf1ab polyprotein | 282  | 291  | 10 | KTIQPRVEKK  | Consensus (ann/smm) | 0.43 |
| 1401 | HLA-A*11:01 | orf1ab polyprotein | 2051 | 2059 | 9  | VVENPTIQK   | Consensus (ann/smm) | 0.43 |
| 1402 | HLA-A*11:01 | orf1ab polyprotein | 4775 | 4783 | 9  | ASGNLLLDK   | Consensus (ann/smm) | 0.43 |
| 1403 | HLA-A*11:01 | orf1ab polyprotein | 5455 | 5463 | 9  | KLFAAETLK   | Consensus (ann/smm) | 0.43 |
| 1404 | HLA-A*11:01 | orf1ab polyprotein | 2307 | 2315 | 9  | IQITISSFK   | Consensus (ann/smm) | 0.43 |
| 1405 | HLA-A*11:01 | orf1ab polyprotein | 4425 | 4433 | 9  | RAFDIYNDK   | Consensus (ann/smm) | 0.43 |
| 1406 | HLA-A*24:02 | orf1ab polyprotein | 2953 | 2962 | 10 | RYVLMDSII   | Consensus (ann/smm) | 0.43 |
| 1407 | HLA-A*24:02 | orf1ab polyprotein | 3605 | 3614 | 10 | FLYENAFLPF  | Consensus (ann/smm) | 0.43 |
| 1408 | HLA-A*24:02 | orf1ab polyprotein | 2324 | 2334 | 11 | VAEWFLAYILF | Consensus (ann/smm) | 0.43 |
| 1409 | HLA-A*24:02 | orf1ab polyprotein | 3653 | 3662 | 10 | VYMPASWVMR  | Consensus (ann/smm) | 0.43 |
| 1410 | HLA-A*26:01 | orf1ab polyprotein | 5585 | 5593 | 9  | EFSSNVANY   | Consensus (ann/smm) | 0.43 |
| 1411 | HLA-A*02:01 | orf1ab polyprotein | 6076 | 6086 | 11 | PLMYKGLPWNV | Consensus (ann/smm) | 0.42 |
| 1412 | HLA-A*02:01 | orf1ab polyprotein | 3115 | 3124 | 10 | YLTNDVSFLA  | Consensus (ann/smm) | 0.42 |
| 1413 | HLA-A*02:06 | orf1ab polyprotein | 3635 | 3644 | 10 | FLCLFLLPSL  | Consensus (ann/smm) | 0.42 |
| 1414 | HLA-A*02:06 | orf1ab polyprotein | 2168 | 2176 | 9  | YMPYFFTL    | Consensus (ann/smm) | 0.42 |
| 1415 | HLA-A*03:01 | orf1ab polyprotein | 1176 | 1185 | 10 | AVFDKNLYDK  | Consensus (ann/smm) | 0.42 |
| 1416 | HLA-A*03:01 | orf1ab polyprotein | 2075 | 2085 | 11 | IILKPANNSLK | Consensus (ann/smm) | 0.42 |
| 1417 | HLA-A*11:01 | orf1ab polyprotein | 1767 | 1776 | 10 | AVMYMGTLISY | Consensus (ann/smm) | 0.42 |

|      |             |                    |      |      |    |             |                     |      |
|------|-------------|--------------------|------|------|----|-------------|---------------------|------|
| 1418 | HLA-A*11:01 | orf1ab polyprotein | 4442 | 4451 | 10 | KTNCCRFQEK  | Consensus (ann/smm) | 0.42 |
| 1419 | HLA-A*11:01 | orf1ab polyprotein | 710  | 719  | 10 | VTHSKGLYRK  | Consensus (ann/smm) | 0.42 |
| 1420 | HLA-A*11:01 | orf1ab polyprotein | 3344 | 3353 | 10 | SMQNCVLKLK  | Consensus (ann/smm) | 0.42 |
| 1421 | HLA-A*11:01 | orf1ab polyprotein | 6532 | 6541 | 10 | AANTVIWDYK  | Consensus (ann/smm) | 0.42 |
| 1422 | HLA-A*11:01 | orf1ab polyprotein | 6777 | 6786 | 10 | TEISFMLWCK  | Consensus (ann/smm) | 0.42 |
| 1423 | HLA-A*11:01 | orf1ab polyprotein | 2384 | 2392 | 9  | YIFFASFYY   | Consensus (ann/smm) | 0.42 |
| 1424 | HLA-A*11:01 | orf1ab polyprotein | 2915 | 2923 | 9  | LAAECTIFK   | Consensus (ann/smm) | 0.42 |
| 1425 | HLA-A*24:02 | orf1ab polyprotein | 3810 | 3820 | 11 | VYDYLVSTQEF | Consensus (ann/smm) | 0.42 |
| 1426 | HLA-A*24:02 | orf1ab polyprotein | 3138 | 3146 | 9  | FWITIAYII   | Consensus (ann/smm) | 0.42 |
| 1427 | HLA-A*26:01 | orf1ab polyprotein | 5078 | 5086 | 9  | TTAYANSVF   | Consensus (ann/smm) | 0.42 |
| 1428 | HLA-A*26:01 | orf1ab polyprotein | 525  | 534  | 10 | EQKSILSPLY  | Consensus (ann/smm) | 0.42 |
| 1429 | HLA-A*31:01 | orf1ab polyprotein | 3219 | 3227 | 9  | GAMDTTSYR   | Consensus (ann/smm) | 0.42 |
| 1430 | HLA-A*31:01 | orf1ab polyprotein | 4580 | 4589 | 10 | KTVQFCDAMR  | Consensus (ann/smm) | 0.42 |
| 1431 | HLA-A*33:03 | orf1ab polyprotein | 5564 | 5572 | 9  | LVPQEHYVR   | netmhcpa_el         | 0.42 |
| 1432 | HLA-A*33:03 | orf1ab polyprotein | 3812 | 3821 | 10 | DYLVSTQEFR  | netmhcpa_el         | 0.42 |
| 1433 | HLA-A*33:03 | orf1ab polyprotein | 5992 | 6001 | 10 | NGYPNMFITR  | netmhcpa_el         | 0.42 |
| 1434 | HLA-A*01:01 | orf1ab polyprotein | 2551 | 2560 | 10 | ESSAKSASVY  | Consensus (ann/smm) | 0.41 |
| 1435 | HLA-A*01:01 | orf1ab polyprotein | 1249 | 1257 | 9  | LTENLLLYI   | Consensus (ann/smm) | 0.41 |
| 1436 | HLA-A*01:01 | orf1ab polyprotein | 4083 | 4091 | 9  | TCDGTTFTY   | Consensus (ann/smm) | 0.41 |
| 1437 | HLA-A*02:01 | orf1ab polyprotein | 1796 | 1805 | 10 | YLVQQESPFV  | Consensus (ann/smm) | 0.41 |
| 1438 | HLA-A*02:06 | orf1ab polyprotein | 3731 | 3740 | 10 | ISMWALIISV  | Consensus (ann/smm) | 0.41 |
| 1439 | HLA-A*03:01 | orf1ab polyprotein | 6293 | 6301 | 9  | YSYATHSDK   | Consensus (ann/smm) | 0.41 |
| 1440 | HLA-A*03:01 | orf1ab polyprotein | 3260 | 3268 | 9  | AVLQSGFRK   | Consensus (ann/smm) | 0.41 |
| 1441 | HLA-A*03:01 | orf1ab polyprotein | 5005 | 5013 | 9  | HLMGWDYPK   | Consensus (ann/smm) | 0.41 |
| 1442 | HLA-A*03:01 | orf1ab polyprotein | 6477 | 6486 | 10 | SIINNTVYTK  | Consensus (ann/smm) | 0.41 |
| 1443 | HLA-A*11:01 | orf1ab polyprotein | 1188 | 1197 | 10 | SSFLEMKSEK  | Consensus (ann/smm) | 0.41 |
| 1444 | HLA-A*11:01 | orf1ab polyprotein | 6924 | 6933 | 10 | LIISDMYDPK  | Consensus (ann/smm) | 0.41 |
| 1445 | HLA-A*11:01 | orf1ab polyprotein | 2614 | 2622 | 9  | ATAEAELAK   | Consensus (ann/smm) | 0.41 |
| 1446 | HLA-A*11:01 | orf1ab polyprotein | 116  | 125  | 10 | VAYRKVLLRK  | Consensus (ann/smm) | 0.41 |

|      |             |                    |      |      |    |            |                                        |      |
|------|-------------|--------------------|------|------|----|------------|----------------------------------------|------|
| 1447 | HLA-A*11:01 | orf1ab polyprotein | 252  | 261  | 10 | QTPFEIKLAK | Consensus (ann/smm)                    | 0.41 |
| 1448 | HLA-A*11:01 | orf1ab polyprotein | 1772 | 1780 | 9  | GTLSYEQFK  | Consensus (ann/smm)                    | 0.41 |
| 1449 | HLA-A*11:01 | orf1ab polyprotein | 729  | 737  | 9  | LLMPLKAPK  | Consensus (ann/smm)                    | 0.41 |
| 1450 | HLA-A*11:01 | orf1ab polyprotein | 3995 | 4003 | 9  | AAMQRKLEK  | Consensus (ann/smm)                    | 0.41 |
| 1451 | HLA-A*24:02 | orf1ab polyprotein | 3812 | 3820 | 9  | DYLVSTQEF  | Consensus (ann/smm)                    | 0.41 |
| 1452 | HLA-A*24:02 | orf1ab polyprotein | 1634 | 1643 | 10 | YYHTTDPNFL | Consensus (ann/smm)                    | 0.41 |
| 1453 | HLA-A*24:02 | orf1ab polyprotein | 3792 | 3800 | 9  | CYGLFLCLL  | Consensus (ann/smm)                    | 0.41 |
| 1454 | HLA-A*24:02 | orf1ab polyprotein | 1795 | 1804 | 10 | KYLVQQESPF | Consensus (ann/smm)                    | 0.41 |
| 1455 | HLA-A*24:02 | orf1ab polyprotein | 1971 | 1979 | 9  | DYKHYPSPF  | Consensus (ann/smm)                    | 0.41 |
| 1456 | HLA-A*24:02 | orf1ab polyprotein | 2346 | 2354 | 9  | IMQLFFSYF  | Consensus (ann/smm)                    | 0.41 |
| 1457 | HLA-A*24:02 | orf1ab polyprotein | 3063 | 3071 | 9  | YFMRFRRAF  | Consensus (ann/smm)                    | 0.41 |
| 1458 | HLA-A*24:02 | orf1ab polyprotein | 2589 | 2598 | 10 | KMFDAYVNTF | Consensus (ann/smm)                    | 0.41 |
| 1459 | HLA-A*31:01 | orf1ab polyprotein | 4733 | 4741 | 9  | VVSTGYHFR  | Consensus (ann/smm)                    | 0.41 |
| 1460 | HLA-A*31:01 | orf1ab polyprotein | 6808 | 6817 | 10 | AMPNLYKMQR | Consensus (ann/smm)                    | 0.41 |
| 1461 | HLA-A*31:01 | orf1ab polyprotein | 394  | 402  | 9  | KTILRKGGGR | Consensus (ann/smm)                    | 0.41 |
| 1462 | HLA-A*31:01 | orf1ab polyprotein | 5793 | 5801 | 9  | AQCFKMFYK  | Consensus (ann/smm)                    | 0.41 |
| 1463 | HLA-A*31:01 | orf1ab polyprotein | 7045 | 7053 | 9  | MSKFPLKLR  | Consensus (ann/smm)                    | 0.41 |
| 1464 | HLA-A*31:01 | orf1ab polyprotein | 3057 | 3066 | 10 | VTCLAYYFMR | Consensus (ann/smm)                    | 0.41 |
| 1465 | HLA-A*33:03 | orf1ab polyprotein | 22   | 29   | 8  | QVRDVLVR   | netmhcpa_el                            | 0.41 |
| 1466 | HLA-A*01:01 | orf1ab polyprotein | 2292 | 2301 | 10 | LSGLDSLDTY | Consensus (ann/smm)                    | 0.4  |
| 1467 | HLA-A*02:01 | orf1ab polyprotein | 1804 | 1812 | 9  | FVMMSAPPA  | Consensus (ann/comblib_sidney2008/smm) | 0.4  |
| 1468 | HLA-A*02:01 | orf1ab polyprotein | 2168 | 2176 | 9  | YMPYFFTL   | Consensus (ann/comblib_sidney2008/smm) | 0.4  |
| 1469 | HLA-A*02:01 | orf1ab polyprotein | 2230 | 2238 | 9  | IIWFLLLSV  | Consensus (ann/comblib_sidney2008/smm) | 0.4  |
| 1470 | HLA-A*02:01 | orf1ab polyprotein | 2348 | 2356 | 9  | QLFFSYFAV  | Consensus (ann/comblib_sidney2008/smm) | 0.4  |
| 1471 | HLA-A*02:01 | orf1ab polyprotein | 2884 | 2892 | 9  | FLPRVFSVA  | Consensus (ann/comblib_sidney2008/smm) | 0.4  |
| 1472 | HLA-A*02:01 | orf1ab polyprotein | 2901 | 2909 | 9  | KLIEYDFA   | Consensus (ann/comblib_sidney2008/smm) | 0.4  |
| 1473 | HLA-A*02:01 | orf1ab polyprotein | 4456 | 4464 | 9  | NLIDSYFVV  | Consensus (ann/comblib_sidney2008/smm) | 0.4  |
| 1474 | HLA-A*02:01 | orf1ab polyprotein | 4726 | 4734 | 9  | FVDGVPFVV  | Consensus (ann/comblib_sidney2008/smm) | 0.4  |
| 1475 | HLA-A*02:01 | orf1ab polyprotein | 5365 | 5373 | 9  | LVLSVNPVY  | Consensus (ann/comblib_sidney2008/smm) | 0.4  |

|      |             |                    |      |      |    |            |                                        |      |
|------|-------------|--------------------|------|------|----|------------|----------------------------------------|------|
| 1476 | HLA-A*02:01 | orf1ab polyprotein | 5470 | 5478 | 9  | KLSYGIATV  | Consensus (ann/comblib_sidney2008/smm) | 0.4  |
| 1477 | HLA-A*03:01 | orf1ab polyprotein | 5709 | 5718 | 10 | SVVNARLRAK | Consensus (ann/smm)                    | 0.4  |
| 1478 | HLA-A*11:01 | orf1ab polyprotein | 2305 | 2315 | 11 | ETIQITISFK | Consensus (ann/smm)                    | 0.4  |
| 1479 | HLA-A*11:01 | orf1ab polyprotein | 1851 | 1860 | 10 | ALLTKSSEYK | Consensus (ann/smm)                    | 0.4  |
| 1480 | HLA-A*11:01 | orf1ab polyprotein | 5586 | 5595 | 10 | FSSNVANYQK | Consensus (ann/smm)                    | 0.4  |
| 1481 | HLA-A*24:02 | orf1ab polyprotein | 4171 | 4180 | 10 | YYNTTKGGRF | Consensus (ann/smm)                    | 0.4  |
| 1482 | HLA-A*26:01 | orf1ab polyprotein | 6977 | 6985 | 9  | DLYKLMGHF  | Consensus (ann/smm)                    | 0.4  |
| 1483 | HLA-A*26:01 | orf1ab polyprotein | 3780 | 3789 | 10 | MLVYCFLGYF | Consensus (ann/smm)                    | 0.4  |
| 1484 | HLA-A*31:01 | orf1ab polyprotein | 6080 | 6088 | 9  | KGLPWNVVR  | Consensus (ann/smm)                    | 0.4  |
| 1485 | HLA-A*31:01 | orf1ab polyprotein | 4671 | 4680 | 10 | RLKLFDRYFK | Consensus (ann/smm)                    | 0.4  |
| 1486 | HLA-A*33:03 | orf1ab polyprotein | 1730 | 1738 | 9  | ETMSYLFQH  | netmhcpa_el                            | 0.4  |
| 1487 | HLA-A*33:03 | orf1ab polyprotein | 3154 | 3162 | 9  | YWFFSNYLK  | netmhcpa_el                            | 0.4  |
| 1488 | HLA-A*33:03 | orf1ab polyprotein | 4567 | 4575 | 9  | YANLGERVR  | netmhcpa_el                            | 0.4  |
| 1489 | HLA-A*33:03 | orf1ab polyprotein | 3442 | 3451 | 10 | GNFYGPFVDR | netmhcpa_el                            | 0.4  |
| 1490 | HLA-A*33:03 | orf1ab polyprotein | 4488 | 4497 | 10 | VAKHDFKFR  | netmhcpa_el                            | 0.4  |
| 1491 | HLA-A*01:01 | orf1ab polyprotein | 4082 | 4091 | 10 | NTCDGTTFTY | Consensus (ann/smm)                    | 0.39 |
| 1492 | HLA-A*02:01 | orf1ab polyprotein | 3089 | 3097 | 9  | FTVLCLTPV  | Consensus (ann/comblib_sidney2008/smm) | 0.39 |
| 1493 | HLA-A*02:06 | orf1ab polyprotein | 2864 | 2872 | 9  | FVVPGLPGT  | Consensus (ann/smm)                    | 0.39 |
| 1494 | HLA-A*02:06 | orf1ab polyprotein | 2901 | 2909 | 9  | KLIEYDFA   | Consensus (ann/smm)                    | 0.39 |
| 1495 | HLA-A*02:06 | orf1ab polyprotein | 3732 | 3740 | 9  | SMWALIISV  | Consensus (ann/smm)                    | 0.39 |
| 1496 | HLA-A*11:01 | orf1ab polyprotein | 4368 | 4377 | 10 | TVCTVCGMWK | Consensus (ann/smm)                    | 0.39 |
| 1497 | HLA-A*11:01 | orf1ab polyprotein | 615  | 623  | 9  | NIFGTVYEK  | Consensus (ann/smm)                    | 0.39 |
| 1498 | HLA-A*11:01 | orf1ab polyprotein | 3672 | 3680 | 9  | TLSLGFKLLK | Consensus (ann/smm)                    | 0.39 |
| 1499 | HLA-A*26:01 | orf1ab polyprotein | 5132 | 5140 | 9  | DFVNEFYAY  | Consensus (ann/smm)                    | 0.39 |
| 1500 | HLA-A*26:01 | orf1ab polyprotein | 2383 | 2392 | 10 | MYIFFASFYY | Consensus (ann/smm)                    | 0.39 |
| 1501 | HLA-A*26:01 | orf1ab polyprotein | 4729 | 4738 | 10 | GVPFVSTGY  | Consensus (ann/smm)                    | 0.39 |
| 1502 | HLA-A*26:01 | orf1ab polyprotein | 5154 | 5162 | 9  | AVVCFNSTY  | Consensus (ann/smm)                    | 0.39 |
| 1503 | HLA-A*26:01 | orf1ab polyprotein | 5298 | 5307 | 10 | MLTNDNTRSY | Consensus (ann/smm)                    | 0.39 |
| 1504 | HLA-A*31:01 | orf1ab polyprotein | 4224 | 4232 | 9  | KVKYLYFIK  | Consensus (ann/smm)                    | 0.39 |

|      |             |                    |      |      |    |             |                     |      |
|------|-------------|--------------------|------|------|----|-------------|---------------------|------|
| 1505 | HLA-A*33:03 | orf1ab polyprotein | 5298 | 5306 | 9  | MLTNDNTR    | netmhcpa_el         | 0.39 |
| 1506 | HLA-A*33:03 | orf1ab polyprotein | 5505 | 5513 | 9  | VFTGYRVTK   | netmhcpa_el         | 0.39 |
| 1507 | HLA-A*01:01 | orf1ab polyprotein | 2254 | 2262 | 9  | MSNLGMPSY   | Consensus (ann/smm) | 0.38 |
| 1508 | HLA-A*02:06 | orf1ab polyprotein | 6245 | 6253 | 9  | ALLADKFPV   | Consensus (ann/smm) | 0.38 |
| 1509 | HLA-A*02:06 | orf1ab polyprotein | 2392 | 2400 | 9  | YVWKSIVHV   | Consensus (ann/smm) | 0.38 |
| 1510 | HLA-A*03:01 | orf1ab polyprotein | 2383 | 2392 | 10 | MYIFFASFYY  | Consensus (ann/smm) | 0.38 |
| 1511 | HLA-A*03:01 | orf1ab polyprotein | 1309 | 1319 | 11 | TTEMLAKLRK  | Consensus (ann/smm) | 0.38 |
| 1512 | HLA-A*11:01 | orf1ab polyprotein | 3622 | 3632 | 11 | SAFAMMFVKHK | Consensus (ann/smm) | 0.38 |
| 1513 | HLA-A*11:01 | orf1ab polyprotein | 4273 | 4281 | 9  | AVDAAKAYK   | Consensus (ann/smm) | 0.38 |
| 1514 | HLA-A*11:01 | orf1ab polyprotein | 5981 | 5989 | 9  | SMMGFKMNY   | Consensus (ann/smm) | 0.38 |
| 1515 | HLA-A*11:01 | orf1ab polyprotein | 6972 | 6980 | 9  | HSWNADLYK   | Consensus (ann/smm) | 0.38 |
| 1516 | HLA-A*11:01 | orf1ab polyprotein | 6622 | 6632 | 11 | EAVKTQFNYYK | Consensus (ann/smm) | 0.38 |
| 1517 | HLA-A*11:01 | orf1ab polyprotein | 6552 | 6561 | 10 | GVCSMTDIK   | Consensus (ann/smm) | 0.38 |
| 1518 | HLA-A*11:01 | orf1ab polyprotein | 1887 | 1895 | 9  | VVCTEIDPK   | Consensus (ann/smm) | 0.38 |
| 1519 | HLA-A*24:02 | orf1ab polyprotein | 4986 | 4994 | 9  | FYGGWHNML   | Consensus (ann/smm) | 0.38 |
| 1520 | HLA-A*26:01 | orf1ab polyprotein | 5133 | 5141 | 9  | FVNEFYAYL   | Consensus (ann/smm) | 0.38 |
| 1521 | HLA-A*31:01 | orf1ab polyprotein | 6206 | 6214 | 9  | AVHECFVKR   | Consensus (ann/smm) | 0.38 |
| 1522 | HLA-A*31:01 | orf1ab polyprotein | 2412 | 2420 | 9  | CYKRNTR     | Consensus (ann/smm) | 0.38 |
| 1523 | HLA-A*33:03 | orf1ab polyprotein | 1116 | 1124 | 9  | HVVGPVNVK   | netmhcpa_el         | 0.38 |
| 1524 | HLA-A*33:03 | orf1ab polyprotein | 3748 | 3756 | 9  | VTTVMFLAR   | netmhcpa_el         | 0.38 |
| 1525 | HLA-A*33:03 | orf1ab polyprotein | 4190 | 4198 | 9  | DLKWARFPK   | netmhcpa_el         | 0.38 |
| 1526 | HLA-A*33:03 | orf1ab polyprotein | 6227 | 6235 | 9  | ELKINAACR   | netmhcpa_el         | 0.38 |
| 1527 | HLA-A*33:03 | orf1ab polyprotein | 533  | 542  | 10 | LYAFASEAAR  | netmhcpa_el         | 0.38 |
| 1528 | HLA-A*01:01 | orf1ab polyprotein | 4758 | 4766 | 9  | LSFKELLY    | Consensus (ann/smm) | 0.37 |
| 1529 | HLA-A*01:01 | orf1ab polyprotein | 5072 | 5081 | 10 | TSSGDATTAY  | Consensus (ann/smm) | 0.37 |
| 1530 | HLA-A*02:01 | orf1ab polyprotein | 4089 | 4098 | 10 | FTYASALWEI  | Consensus (ann/smm) | 0.37 |
| 1531 | HLA-A*02:01 | orf1ab polyprotein | 6781 | 6790 | 10 | FMLWCKDGHV  | Consensus (ann/smm) | 0.37 |
| 1532 | HLA-A*02:06 | orf1ab polyprotein | 3806 | 3815 | 10 | LTLGVYDYL   | Consensus (ann/smm) | 0.37 |
| 1533 | HLA-A*02:06 | orf1ab polyprotein | 4363 | 4372 | 10 | FTLKNTVCTV  | Consensus (ann/smm) | 0.37 |

|      |             |                    |      |      |    |             |                     |      |
|------|-------------|--------------------|------|------|----|-------------|---------------------|------|
| 1534 | HLA-A*11:01 | orf1ab polyprotein | 5709 | 5718 | 10 | SVVNARLRAK  | Consensus (ann/smm) | 0.37 |
| 1535 | HLA-A*11:01 | orf1ab polyprotein | 1521 | 1529 | 9  | TQLGIEFLK   | Consensus (ann/smm) | 0.37 |
| 1536 | HLA-A*26:01 | orf1ab polyprotein | 3781 | 3789 | 9  | LVYCYFLGYF  | Consensus (ann/smm) | 0.37 |
| 1537 | HLA-A*33:03 | orf1ab polyprotein | 676  | 684  | 9  | QTFFKLVNK   | netmhcpa_el         | 0.37 |
| 1538 | HLA-A*33:03 | orf1ab polyprotein | 4958 | 4966 | 9  | MTNRQFHQK   | netmhcpa_el         | 0.37 |
| 1539 | HLA-A*33:03 | orf1ab polyprotein | 5534 | 5542 | 9  | VYRGTTTYK   | netmhcpa_el         | 0.37 |
| 1540 | HLA-A*33:03 | orf1ab polyprotein | 6193 | 6203 | 11 | HVASCDAIMTR | netmhcpa_el         | 0.37 |
| 1541 | HLA-A*33:03 | orf1ab polyprotein | 6440 | 6450 | 11 | DTYNLWNTFTR | netmhcpa_el         | 0.37 |
| 1542 | HLA-A*02:06 | orf1ab polyprotein | 3709 | 3718 | 10 | WTLMNVLTIV  | Consensus (ann/smm) | 0.36 |
| 1543 | HLA-A*02:06 | orf1ab polyprotein | 878  | 886  | 9  | AVIKTLQPV   | Consensus (ann/smm) | 0.36 |
| 1544 | HLA-A*02:06 | orf1ab polyprotein | 2323 | 2332 | 10 | LVAEWFLAYI  | Consensus (ann/smm) | 0.36 |
| 1545 | HLA-A*02:06 | orf1ab polyprotein | 2363 | 2372 | 10 | WLMWLIINLV  | Consensus (ann/smm) | 0.36 |
| 1546 | HLA-A*02:06 | orf1ab polyprotein | 6036 | 6045 | 10 | FSTGVNLVAV  | Consensus (ann/smm) | 0.36 |
| 1547 | HLA-A*03:01 | orf1ab polyprotein | 120  | 129  | 10 | KVLLRKNGNK  | Consensus (ann/smm) | 0.36 |
| 1548 | HLA-A*03:01 | orf1ab polyprotein | 2191 | 2200 | 10 | KASMPPTIAK  | Consensus (ann/smm) | 0.36 |
| 1549 | HLA-A*11:01 | orf1ab polyprotein | 3920 | 3929 | 10 | SMQGAVDINK  | Consensus (ann/smm) | 0.36 |
| 1550 | HLA-A*11:01 | orf1ab polyprotein | 5255 | 5263 | 9  | AIDAYPLTK   | Consensus (ann/smm) | 0.36 |
| 1551 | HLA-A*24:02 | orf1ab polyprotein | 1674 | 1683 | 10 | CYLATALLTL  | Consensus (ann/smm) | 0.36 |
| 1552 | HLA-A*24:02 | orf1ab polyprotein | 248  | 257  | 10 | SYELQTPFEI  | Consensus (ann/smm) | 0.36 |
| 1553 | HLA-A*26:01 | orf1ab polyprotein | 3100 | 3109 | 10 | FLPGVYSVIY  | Consensus (ann/smm) | 0.36 |
| 1554 | HLA-A*26:01 | orf1ab polyprotein | 4367 | 4375 | 9  | NTVCTVCGM   | Consensus (ann/smm) | 0.36 |
| 1555 | HLA-A*26:01 | orf1ab polyprotein | 6622 | 6630 | 9  | EAVKTQFNY   | Consensus (ann/smm) | 0.36 |
| 1556 | HLA-A*33:03 | orf1ab polyprotein | 829  | 837  | 9  | TVIEVQGYK   | netmhcpa_el         | 0.36 |
| 1557 | HLA-A*33:03 | orf1ab polyprotein | 634  | 643  | 10 | KFKEGVEFLR  | netmhcpa_el         | 0.36 |
| 1558 | HLA-A*33:03 | orf1ab polyprotein | 2106 | 2115 | 10 | TIKKPNELSR  | netmhcpa_el         | 0.36 |
| 1559 | HLA-A*33:03 | orf1ab polyprotein | 4186 | 4195 | 10 | SDLQDLKWAR  | netmhcpa_el         | 0.36 |
| 1560 | HLA-A*01:01 | orf1ab polyprotein | 4539 | 4548 | 10 | VTYNCCDDDY  | Consensus (ann/smm) | 0.35 |
| 1561 | HLA-A*02:06 | orf1ab polyprotein | 3638 | 3647 | 10 | LFLPLSLATV  | Consensus (ann/smm) | 0.35 |
| 1562 | HLA-A*02:06 | orf1ab polyprotein | 5946 | 5954 | 9  | TQAPTHLSV   | Consensus (ann/smm) | 0.35 |

|      |             |                    |      |      |    |             |                     |      |
|------|-------------|--------------------|------|------|----|-------------|---------------------|------|
| 1563 | HLA-A*02:06 | orf1ab polyprotein | 6186 | 6194 | 9  | CQVHGNAHV   | Consensus (ann/smm) | 0.35 |
| 1564 | HLA-A*03:01 | orf1ab polyprotein | 3893 | 3902 | 10 | QLHNDILLAK  | Consensus (ann/smm) | 0.35 |
| 1565 | HLA-A*03:01 | orf1ab polyprotein | 1973 | 1981 | 9  | KHYTPSFKK   | Consensus (ann/smm) | 0.35 |
| 1566 | HLA-A*03:01 | orf1ab polyprotein | 4958 | 4966 | 9  | MTNRQFHQK   | Consensus (ann/smm) | 0.35 |
| 1567 | HLA-A*03:01 | orf1ab polyprotein | 5386 | 5394 | 9  | QLYLGMSY    | Consensus (ann/smm) | 0.35 |
| 1568 | HLA-A*03:01 | orf1ab polyprotein | 6702 | 6711 | 10 | LLIGLAKRFK  | Consensus (ann/smm) | 0.35 |
| 1569 | HLA-A*11:01 | orf1ab polyprotein | 6531 | 6541 | 11 | IAANTVIWDYK | Consensus (ann/smm) | 0.35 |
| 1570 | HLA-A*11:01 | orf1ab polyprotein | 5059 | 5068 | 10 | VMCGGSLYVK  | Consensus (ann/smm) | 0.35 |
| 1571 | HLA-A*11:01 | orf1ab polyprotein | 5254 | 5263 | 10 | LADAYPLTK   | Consensus (ann/smm) | 0.35 |
| 1572 | HLA-A*11:01 | orf1ab polyprotein | 2719 | 2727 | 9  | MSLSEQLRK   | Consensus (ann/smm) | 0.35 |
| 1573 | HLA-A*24:02 | orf1ab polyprotein | 6418 | 6426 | 9  | LYLDAYNMM   | Consensus (ann/smm) | 0.35 |
| 1574 | HLA-A*24:02 | orf1ab polyprotein | 1898 | 1907 | 10 | NYYKKDNSYF  | Consensus (ann/smm) | 0.35 |
| 1575 | HLA-A*24:02 | orf1ab polyprotein | 3821 | 3830 | 10 | RYMNSQGLLP  | Consensus (ann/smm) | 0.35 |
| 1576 | HLA-A*24:02 | orf1ab polyprotein | 2779 | 2787 | 9  | VFLFVAIF    | Consensus (ann/smm) | 0.35 |
| 1577 | HLA-A*24:02 | orf1ab polyprotein | 5139 | 5147 | 9  | AYLRKHFSM   | Consensus (ann/smm) | 0.35 |
| 1578 | HLA-A*31:01 | orf1ab polyprotein | 6130 | 6138 | 9  | RTCLCDRR    | Consensus (ann/smm) | 0.35 |
| 1579 | HLA-A*33:03 | orf1ab polyprotein | 4716 | 4724 | 9  | TSGPLVRK    | netmhcpa_el         | 0.35 |
| 1580 | HLA-A*33:03 | orf1ab polyprotein | 5997 | 6006 | 10 | MFITREEAIR  | netmhcpa_el         | 0.35 |
| 1581 | HLA-A*01:01 | orf1ab polyprotein | 4841 | 4850 | 10 | AISDYDYRY   | Consensus (ann/smm) | 0.34 |
| 1582 | HLA-A*01:01 | orf1ab polyprotein | 1174 | 1183 | 10 | YLAVFDKNLY  | Consensus (ann/smm) | 0.34 |
| 1583 | HLA-A*01:01 | orf1ab polyprotein | 5858 | 5867 | 10 | DSSQGSEYDY  | Consensus (ann/smm) | 0.34 |
| 1584 | HLA-A*02:06 | orf1ab polyprotein | 4788 | 4797 | 10 | FSVAALTNNV  | Consensus (ann/smm) | 0.34 |
| 1585 | HLA-A*02:06 | orf1ab polyprotein | 1566 | 1574 | 9  | RTIKVFTTV   | Consensus (ann/smm) | 0.34 |
| 1586 | HLA-A*02:06 | orf1ab polyprotein | 4456 | 4464 | 9  | NLIDSYFVV   | Consensus (ann/smm) | 0.34 |
| 1587 | HLA-A*02:06 | orf1ab polyprotein | 5317 | 5326 | 10 | YTPHTVLQAV  | Consensus (ann/smm) | 0.34 |
| 1588 | HLA-A*03:01 | orf1ab polyprotein | 2306 | 2315 | 10 | TIQITISFK   | Consensus (ann/smm) | 0.34 |
| 1589 | HLA-A*03:01 | orf1ab polyprotein | 7003 | 7012 | 10 | FLIGCNLYGK  | Consensus (ann/smm) | 0.34 |
| 1590 | HLA-A*03:01 | orf1ab polyprotein | 314  | 322  | 9  | QMCLSTLMK   | Consensus (ann/smm) | 0.34 |
| 1591 | HLA-A*11:01 | orf1ab polyprotein | 6429 | 6437 | 9  | AGFSLWVYK   | Consensus (ann/smm) | 0.34 |

|      |             |                    |      |      |    |             |                                        |      |
|------|-------------|--------------------|------|------|----|-------------|----------------------------------------|------|
| 1592 | HLA-A*24:02 | orf1ab polyprotein | 3166 | 3175 | 10 | VFNGVSFSTF  | Consensus (ann/smm)                    | 0.34 |
| 1593 | HLA-A*24:02 | orf1ab polyprotein | 6775 | 6784 | 10 | DYTEISFMLW  | Consensus (ann/smm)                    | 0.34 |
| 1594 | HLA-A*24:02 | orf1ab polyprotein | 954  | 962  | 9  | DYQGKPLEF   | Consensus (ann/smm)                    | 0.34 |
| 1595 | HLA-A*26:01 | orf1ab polyprotein | 5299 | 5307 | 9  | LTNDNSTRY   | Consensus (ann/smm)                    | 0.34 |
| 1596 | HLA-A*26:01 | orf1ab polyprotein | 1414 | 1423 | 10 | GVVDYGARFY  | Consensus (ann/smm)                    | 0.34 |
| 1597 | HLA-A*26:01 | orf1ab polyprotein | 1024 | 1032 | 9  | EVNSFSGYL   | Consensus (ann/smm)                    | 0.34 |
| 1598 | HLA-A*26:01 | orf1ab polyprotein | 3373 | 3381 | 9  | QTFSVLACY   | Consensus (ann/smm)                    | 0.34 |
| 1599 | HLA-A*31:01 | orf1ab polyprotein | 2410 | 2417 | 8  | MMCYKRNR    | ann                                    | 0.34 |
| 1600 | HLA-A*33:03 | orf1ab polyprotein | 5592 | 5600 | 9  | NYQKVGMQK   | netmhcpa_el                            | 0.34 |
| 1601 | HLA-A*01:01 | orf1ab polyprotein | 5298 | 5307 | 10 | MLTNDNSTRY  | Consensus (ann/smm)                    | 0.33 |
| 1602 | HLA-A*01:01 | orf1ab polyprotein | 2897 | 2905 | 9  | YTPSKLIEY   | Consensus (ann/smm)                    | 0.33 |
| 1603 | HLA-A*01:01 | orf1ab polyprotein | 6302 | 6310 | 9  | FTDGVCLFW   | Consensus (ann/smm)                    | 0.33 |
| 1604 | HLA-A*01:01 | orf1ab polyprotein | 1873 | 1882 | 10 | YTTTIKPVTY  | Consensus (ann/smm)                    | 0.33 |
| 1605 | HLA-A*02:01 | orf1ab polyprotein | 685  | 693  | 9  | FLALCADSI   | Consensus (ann/comblib_sidney2008/smm) | 0.33 |
| 1606 | HLA-A*02:01 | orf1ab polyprotein | 6980 | 6989 | 10 | KLMGHFAWWT  | Consensus (ann/smm)                    | 0.33 |
| 1607 | HLA-A*02:06 | orf1ab polyprotein | 3645 | 3653 | 9  | ATVAYFNMV   | Consensus (ann/smm)                    | 0.33 |
| 1608 | HLA-A*03:01 | orf1ab polyprotein | 2192 | 2200 | 9  | ASMPPTIAK   | Consensus (ann/smm)                    | 0.33 |
| 1609 | HLA-A*03:01 | orf1ab polyprotein | 3184 | 3192 | 9  | LLNKEMYLK   | Consensus (ann/smm)                    | 0.33 |
| 1610 | HLA-A*03:01 | orf1ab polyprotein | 4487 | 4495 | 9  | AVAKHDFFK   | Consensus (ann/smm)                    | 0.33 |
| 1611 | HLA-A*03:01 | orf1ab polyprotein | 3206 | 3215 | 10 | RYLALYNKYK  | Consensus (ann/smm)                    | 0.33 |
| 1612 | HLA-A*03:01 | orf1ab polyprotein | 3524 | 3532 | 9  | VLDMCASLK   | Consensus (ann/smm)                    | 0.33 |
| 1613 | HLA-A*03:01 | orf1ab polyprotein | 5981 | 5989 | 9  | SMMGFKMNY   | Consensus (ann/smm)                    | 0.33 |
| 1614 | HLA-A*11:01 | orf1ab polyprotein | 3523 | 3532 | 10 | AVLDMCASLK  | Consensus (ann/smm)                    | 0.33 |
| 1615 | HLA-A*11:01 | orf1ab polyprotein | 4774 | 4783 | 10 | AASGNLLLDK  | Consensus (ann/smm)                    | 0.33 |
| 1616 | HLA-A*11:01 | orf1ab polyprotein | 3103 | 3111 | 9  | GVYSVIYLY   | Consensus (ann/smm)                    | 0.33 |
| 1617 | HLA-A*24:02 | orf1ab polyprotein | 1633 | 1642 | 10 | EYYHTTDPSP  | Consensus (ann/smm)                    | 0.33 |
| 1618 | HLA-A*24:02 | orf1ab polyprotein | 3104 | 3114 | 11 | VYSVIYLYLTF | Consensus (ann/smm)                    | 0.33 |
| 1619 | HLA-A*24:02 | orf1ab polyprotein | 835  | 843  | 9  | GYKSVNITF   | Consensus (ann/smm)                    | 0.33 |
| 1620 | HLA-A*24:02 | orf1ab polyprotein | 2326 | 2334 | 9  | EWFLAYILF   | Consensus (ann/smm)                    | 0.33 |

|      |             |                    |      |      |    |            |                     |      |
|------|-------------|--------------------|------|------|----|------------|---------------------|------|
| 1621 | HLA-A*24:02 | orf1ab polyprotein | 4429 | 4437 | 9  | IYNDKVAGF  | Consensus (ann/smm) | 0.33 |
| 1622 | HLA-A*24:02 | orf1ab polyprotein | 2349 | 2358 | 10 | LFFSYFAVHF | Consensus (ann/smm) | 0.33 |
| 1623 | HLA-A*26:01 | orf1ab polyprotein | 4979 | 4987 | 9  | VVIGTSKFY  | Consensus (ann/smm) | 0.33 |
| 1624 | HLA-A*26:01 | orf1ab polyprotein | 6440 | 6448 | 9  | DTYNLWNTF  | Consensus (ann/smm) | 0.33 |
| 1625 | HLA-A*26:01 | orf1ab polyprotein | 5614 | 5623 | 10 | HFAIGLALYY | Consensus (ann/smm) | 0.33 |
| 1626 | HLA-A*26:01 | orf1ab polyprotein | 2201 | 2209 | 9  | NTVKSVGKF  | Consensus (ann/smm) | 0.33 |
| 1627 | HLA-A*26:01 | orf1ab polyprotein | 2384 | 2392 | 9  | YIFFASFYY  | Consensus (ann/smm) | 0.33 |
| 1628 | HLA-A*33:03 | orf1ab polyprotein | 4557 | 4565 | 9  | FVENPDILR  | netmhcpa_el         | 0.33 |
| 1629 | HLA-A*33:03 | orf1ab polyprotein | 4814 | 4822 | 9  | FAVSKGFFK  | netmhcpa_el         | 0.33 |
| 1630 | HLA-A*01:01 | orf1ab polyprotein | 5269 | 5277 | 9  | YADVFLHLYL | Consensus (ann/smm) | 0.32 |
| 1631 | HLA-A*02:06 | orf1ab polyprotein | 1010 | 1019 | 10 | PQLEMELTPV | Consensus (ann/smm) | 0.32 |
| 1632 | HLA-A*02:06 | orf1ab polyprotein | 1248 | 1257 | 10 | FLTENLLLYI | Consensus (ann/smm) | 0.32 |
| 1633 | HLA-A*02:06 | orf1ab polyprotein | 2775 | 2783 | 9  | KVTLVFLFV  | Consensus (ann/smm) | 0.32 |
| 1634 | HLA-A*02:06 | orf1ab polyprotein | 3466 | 3475 | 10 | NVLAWLYAAV | Consensus (ann/smm) | 0.32 |
| 1635 | HLA-A*02:06 | orf1ab polyprotein | 5469 | 5478 | 10 | FKLSYGIATV | Consensus (ann/smm) | 0.32 |
| 1636 | HLA-A*02:06 | orf1ab polyprotein | 4029 | 4037 | 9  | MQTMLFTML  | Consensus (ann/smm) | 0.32 |
| 1637 | HLA-A*03:01 | orf1ab polyprotein | 3622 | 3630 | 9  | SAFAMMFVK  | Consensus (ann/smm) | 0.32 |
| 1638 | HLA-A*03:01 | orf1ab polyprotein | 4505 | 4513 | 9  | HISRQRLTK  | Consensus (ann/smm) | 0.32 |
| 1639 | HLA-A*11:01 | orf1ab polyprotein | 3343 | 3351 | 9  | HSMQNCVLK  | Consensus (ann/smm) | 0.32 |
| 1640 | HLA-A*24:02 | orf1ab polyprotein | 6418 | 6427 | 10 | LYLDAYNMMI | Consensus (ann/smm) | 0.32 |
| 1641 | HLA-A*26:01 | orf1ab polyprotein | 2273 | 2281 | 9  | STNVTIATY  | Consensus (ann/smm) | 0.32 |
| 1642 | HLA-A*26:01 | orf1ab polyprotein | 3646 | 3654 | 9  | TVAYFNMVY  | Consensus (ann/smm) | 0.32 |
| 1643 | HLA-A*26:01 | orf1ab polyprotein | 5286 | 5294 | 9  | ELTGHMLDM  | Consensus (ann/smm) | 0.32 |
| 1644 | HLA-A*31:01 | orf1ab polyprotein | 3059 | 3068 | 10 | CLAYYFMRFR | Consensus (ann/smm) | 0.32 |
| 1645 | HLA-A*31:01 | orf1ab polyprotein | 3653 | 3662 | 10 | VYMPASWVMR | Consensus (ann/smm) | 0.32 |
| 1646 | HLA-A*33:03 | orf1ab polyprotein | 2328 | 2336 | 9  | FLAYILFTR  | netmhcpa_el         | 0.32 |
| 1647 | HLA-A*33:03 | orf1ab polyprotein | 5970 | 5978 | 9  | IPKDMTYRR  | netmhcpa_el         | 0.32 |
| 1648 | HLA-A*33:03 | orf1ab polyprotein | 6809 | 6817 | 9  | MPNLYKMQR  | netmhcpa_el         | 0.32 |
| 1649 | HLA-A*33:03 | orf1ab polyprotein | 6876 | 6884 | 9  | VAPGTAVLR  | netmhcpa_el         | 0.32 |

|      |             |                    |      |      |    |             |                                        |      |
|------|-------------|--------------------|------|------|----|-------------|----------------------------------------|------|
| 1650 | HLA-A*33:03 | orf1ab polyprotein | 5133 | 5142 | 10 | FVNEFYAYLR  | netmhcpa_el                            | 0.32 |
| 1651 | HLA-A*01:01 | orf1ab polyprotein | 1165 | 1174 | 10 | CVDTVRTNVY  | Consensus (ann/smm)                    | 0.31 |
| 1652 | HLA-A*02:06 | orf1ab polyprotein | 5364 | 5373 | 10 | KLVLSPNPYV  | Consensus (ann/smm)                    | 0.31 |
| 1653 | HLA-A*02:06 | orf1ab polyprotein | 4726 | 4734 | 9  | FVDGVPFVV   | Consensus (ann/smm)                    | 0.31 |
| 1654 | HLA-A*03:01 | orf1ab polyprotein | 2920 | 2928 | 9  | TIFKASGK    | Consensus (ann/smm)                    | 0.31 |
| 1655 | HLA-A*03:01 | orf1ab polyprotein | 2502 | 2511 | 10 | HLYFDKAGQK  | Consensus (ann/smm)                    | 0.31 |
| 1656 | HLA-A*11:01 | orf1ab polyprotein | 807  | 816  | 10 | MVTNNTFTLK  | Consensus (ann/smm)                    | 0.31 |
| 1657 | HLA-A*11:01 | orf1ab polyprotein | 4801 | 4809 | 9  | TVKPGNFNK   | Consensus (ann/smm)                    | 0.31 |
| 1658 | HLA-A*11:01 | orf1ab polyprotein | 5005 | 5013 | 9  | HLMGWDPYK   | Consensus (ann/smm)                    | 0.31 |
| 1659 | HLA-A*24:02 | orf1ab polyprotein | 5534 | 5543 | 10 | VYRGTTTYKL  | Consensus (ann/smm)                    | 0.31 |
| 1660 | HLA-A*26:01 | orf1ab polyprotein | 1865 | 1873 | 9  | DVFKYKNSY   | Consensus (ann/smm)                    | 0.31 |
| 1661 | HLA-A*26:01 | orf1ab polyprotein | 1727 | 1737 | 11 | DVRETMSYLFQ | Consensus (ann/smm)                    | 0.31 |
| 1662 | HLA-A*31:01 | orf1ab polyprotein | 6078 | 6088 | 11 | MYKGLPWNVVR | Consensus (ann/smm)                    | 0.31 |
| 1663 | HLA-A*33:03 | orf1ab polyprotein | 390  | 398  | 9  | ESGLKTILR   | netmhcpa_el                            | 0.31 |
| 1664 | HLA-A*33:03 | orf1ab polyprotein | 4581 | 4589 | 9  | TVQFCDAMR   | netmhcpa_el                            | 0.31 |
| 1665 | HLA-A*33:03 | orf1ab polyprotein | 5167 | 5175 | 9  | LVASIKNFK   | netmhcpa_el                            | 0.31 |
| 1666 | HLA-A*33:03 | orf1ab polyprotein | 5268 | 5276 | 9  | EYADVFLHY   | netmhcpa_el                            | 0.31 |
| 1667 | HLA-A*33:03 | orf1ab polyprotein | 6442 | 6450 | 9  | YNLWNTFTR   | netmhcpa_el                            | 0.31 |
| 1668 | HLA-A*02:01 | orf1ab polyprotein | 1675 | 1683 | 9  | YLATALLTL   | Consensus (ann/comblib_sidney2008/smm) | 0.3  |
| 1669 | HLA-A*02:01 | orf1ab polyprotein | 3128 | 3136 | 9  | WMVMFTPLV   | Consensus (ann/comblib_sidney2008/smm) | 0.3  |
| 1670 | HLA-A*02:01 | orf1ab polyprotein | 4094 | 4102 | 9  | ALWEIQQVV   | Consensus (ann/comblib_sidney2008/smm) | 0.3  |
| 1671 | HLA-A*02:01 | orf1ab polyprotein | 4266 | 4274 | 9  | VLSFCFAV    | Consensus (ann/comblib_sidney2008/smm) | 0.3  |
| 1672 | HLA-A*02:01 | orf1ab polyprotein | 4515 | 4523 | 9  | TMADLVYAL   | Consensus (ann/comblib_sidney2008/smm) | 0.3  |
| 1673 | HLA-A*02:01 | orf1ab polyprotein | 6109 | 6117 | 9  | VLWAHGFEL   | Consensus (ann/comblib_sidney2008/smm) | 0.3  |
| 1674 | HLA-A*02:01 | orf1ab polyprotein | 6245 | 6253 | 9  | ALLADKFPV   | Consensus (ann/comblib_sidney2008/smm) | 0.3  |
| 1675 | HLA-A*02:01 | orf1ab polyprotein | 6419 | 6427 | 9  | YLDAYNMMI   | Consensus (ann/comblib_sidney2008/smm) | 0.3  |
| 1676 | HLA-A*02:01 | orf1ab polyprotein | 6749 | 6757 | 9  | LLDDFVEI    | Consensus (ann/comblib_sidney2008/smm) | 0.3  |
| 1677 | HLA-A*02:01 | orf1ab polyprotein | 6851 | 6859 | 9  | YLNTLTLAV   | Consensus (ann/comblib_sidney2008/smm) | 0.3  |
| 1678 | HLA-A*02:06 | orf1ab polyprotein | 3012 | 3021 | 10 | RSLPGVFCGV  | Consensus (ann/smm)                    | 0.3  |

|      |             |                    |      |      |    |             |                     |      |
|------|-------------|--------------------|------|------|----|-------------|---------------------|------|
| 1679 | HLA-A*02:06 | orf1ab polyprotein | 5924 | 5932 | 9  | LQAENVTLGL  | Consensus (ann/smm) | 0.3  |
| 1680 | HLA-A*03:01 | orf1ab polyprotein | 1875 | 1883 | 9  | TTIKPVITYK  | Consensus (ann/smm) | 0.3  |
| 1681 | HLA-A*03:01 | orf1ab polyprotein | 5710 | 5718 | 9  | VVNARLRAK   | Consensus (ann/smm) | 0.3  |
| 1682 | HLA-A*03:01 | orf1ab polyprotein | 3344 | 3353 | 10 | SMQNCVLKLLK | Consensus (ann/smm) | 0.3  |
| 1683 | HLA-A*03:01 | orf1ab polyprotein | 1103 | 1112 | 10 | CVLSGHNLAK  | Consensus (ann/smm) | 0.3  |
| 1684 | HLA-A*11:01 | orf1ab polyprotein | 1272 | 1280 | 9  | SDIDITFLK   | Consensus (ann/smm) | 0.3  |
| 1685 | HLA-A*11:01 | orf1ab polyprotein | 2196 | 2204 | 9  | TTIAKNTVK   | Consensus (ann/smm) | 0.3  |
| 1686 | HLA-A*11:01 | orf1ab polyprotein | 6814 | 6822 | 9  | KMQRMLLEK   | Consensus (ann/smm) | 0.3  |
| 1687 | HLA-A*11:01 | orf1ab polyprotein | 1186 | 1194 | 9  | LVSSFLEMK   | Consensus (ann/smm) | 0.3  |
| 1688 | HLA-A*24:02 | orf1ab polyprotein | 1858 | 1867 | 10 | EYKGPITDVF  | Consensus (ann/smm) | 0.3  |
| 1689 | HLA-A*26:01 | orf1ab polyprotein | 567  | 576  | 10 | ITILDGISQY  | Consensus (ann/smm) | 0.3  |
| 1690 | HLA-A*26:01 | orf1ab polyprotein | 1248 | 1256 | 9  | FLTENLLLY   | Consensus (ann/smm) | 0.3  |
| 1691 | HLA-A*31:01 | orf1ab polyprotein | 2407 | 2415 | 9  | STCMMCYKR   | Consensus (ann/smm) | 0.3  |
| 1692 | HLA-A*31:01 | orf1ab polyprotein | 5647 | 5656 | 10 | KYLPIDKCSR  | Consensus (ann/smm) | 0.3  |
| 1693 | HLA-A*33:03 | orf1ab polyprotein | 3985 | 3993 | 9  | NVAKSEFDR   | netmhcpa_el         | 0.3  |
| 1694 | HLA-A*33:03 | orf1ab polyprotein | 5005 | 5013 | 9  | HLMGWDPYK   | netmhcpa_el         | 0.3  |
| 1695 | HLA-A*33:03 | orf1ab polyprotein | 5489 | 5497 | 9  | LSWEVGKPR   | netmhcpa_el         | 0.3  |
| 1696 | HLA-A*33:03 | orf1ab polyprotein | 6097 | 6105 | 9  | DTLKNLSDR   | netmhcpa_el         | 0.3  |
| 1697 | HLA-A*33:03 | orf1ab polyprotein | 2631 | 2638 | 8  | STFISAAR    | netmhcpa_el         | 0.3  |
| 1698 | HLA-A*33:03 | orf1ab polyprotein | 7044 | 7053 | 10 | DMSKFPLKLR  | netmhcpa_el         | 0.3  |
| 1699 | HLA-A*01:01 | orf1ab polyprotein | 896  | 905  | 10 | DLDEWSMATY  | Consensus (ann/smm) | 0.29 |
| 1700 | HLA-A*02:06 | orf1ab polyprotein | 3013 | 3021 | 9  | SLPGVFCGV   | Consensus (ann/smm) | 0.29 |
| 1701 | HLA-A*02:06 | orf1ab polyprotein | 3128 | 3136 | 9  | WMVMFTPLV   | Consensus (ann/smm) | 0.29 |
| 1702 | HLA-A*02:06 | orf1ab polyprotein | 2771 | 2779 | 9  | KQLIKVTLV   | Consensus (ann/smm) | 0.29 |
| 1703 | HLA-A*03:01 | orf1ab polyprotein | 676  | 684  | 9  | QTFKLVNK    | Consensus (ann/smm) | 0.29 |
| 1704 | HLA-A*03:01 | orf1ab polyprotein | 1504 | 1512 | 9  | TISLAGSYK   | Consensus (ann/smm) | 0.29 |
| 1705 | HLA-A*11:01 | orf1ab polyprotein | 6925 | 6933 | 9  | IISDMYDPK   | Consensus (ann/smm) | 0.29 |
| 1706 | HLA-A*26:01 | orf1ab polyprotein | 2897 | 2905 | 9  | YTPSKLIEY   | Consensus (ann/smm) | 0.29 |
| 1707 | HLA-A*26:01 | orf1ab polyprotein | 670  | 679  | 10 | EIKESVQTF   | Consensus (ann/smm) | 0.29 |

|      |             |                    |      |      |    |            |                     |      |
|------|-------------|--------------------|------|------|----|------------|---------------------|------|
| 1708 | HLA-A*26:01 | orf1ab polyprotein | 3736 | 3744 | 9  | LIISVTSNY  | Consensus (ann/smm) | 0.29 |
| 1709 | HLA-A*26:01 | orf1ab polyprotein | 4370 | 4379 | 10 | CTVCGMWKGY | Consensus (ann/smm) | 0.29 |
| 1710 | HLA-A*31:01 | orf1ab polyprotein | 4565 | 4573 | 9  | RVYANLGER  | Consensus (ann/smm) | 0.29 |
| 1711 | HLA-A*33:03 | orf1ab polyprotein | 6321 | 6329 | 9  | SIVCRFDTR  | netmhcpa_el         | 0.29 |
| 1712 | HLA-A*33:03 | orf1ab polyprotein | 2373 | 2382 | 10 | QMAPISAMVR | netmhcpa_el         | 0.29 |
| 1713 | HLA-A*33:03 | orf1ab polyprotein | 4230 | 4239 | 10 | FIKGLNNLNR | netmhcpa_el         | 0.29 |
| 1714 | HLA-A*01:01 | orf1ab polyprotein | 2552 | 2561 | 10 | SSAKSASVYY | Consensus (ann/smm) | 0.28 |
| 1715 | HLA-A*02:01 | orf1ab polyprotein | 4514 | 4523 | 10 | YTMADLVYAL | Consensus (ann/smm) | 0.28 |
| 1716 | HLA-A*02:06 | orf1ab polyprotein | 4139 | 4147 | 9  | LQNNELSPV  | Consensus (ann/smm) | 0.28 |
| 1717 | HLA-A*02:06 | orf1ab polyprotein | 5365 | 5373 | 9  | LVLSVNPYV  | Consensus (ann/smm) | 0.28 |
| 1718 | HLA-A*03:01 | orf1ab polyprotein | 729  | 737  | 9  | LLMPLKAPK  | Consensus (ann/smm) | 0.28 |
| 1719 | HLA-A*03:01 | orf1ab polyprotein | 4130 | 4138 | 9  | ALRANSVVK  | Consensus (ann/smm) | 0.28 |
| 1720 | HLA-A*11:01 | orf1ab polyprotein | 2306 | 2315 | 10 | TIQITISFK  | Consensus (ann/smm) | 0.28 |
| 1721 | HLA-A*11:01 | orf1ab polyprotein | 5775 | 5784 | 10 | TVSALVYDNK | Consensus (ann/smm) | 0.28 |
| 1722 | HLA-A*11:01 | orf1ab polyprotein | 4224 | 4232 | 9  | KVKYLYFIK  | Consensus (ann/smm) | 0.28 |
| 1723 | HLA-A*11:01 | orf1ab polyprotein | 4961 | 4969 | 9  | RQFHQKLLK  | Consensus (ann/smm) | 0.28 |
| 1724 | HLA-A*11:01 | orf1ab polyprotein | 6478 | 6486 | 9  | IINNTVYTK  | Consensus (ann/smm) | 0.28 |
| 1725 | HLA-A*24:02 | orf1ab polyprotein | 6978 | 6987 | 10 | LYKLMGHFAW | Consensus (ann/smm) | 0.28 |
| 1726 | HLA-A*24:02 | orf1ab polyprotein | 1182 | 1190 | 9  | LYDKLVSSF  | Consensus (ann/smm) | 0.28 |
| 1727 | HLA-A*24:02 | orf1ab polyprotein | 2385 | 2394 | 10 | IFFASFYVW  | Consensus (ann/smm) | 0.28 |
| 1728 | HLA-A*26:01 | orf1ab polyprotein | 1394 | 1402 | 9  | ETKAIVSTI  | Consensus (ann/smm) | 0.28 |
| 1729 | HLA-A*31:01 | orf1ab polyprotein | 5118 | 5125 | 8  | RLYECLYR   | ann                 | 0.28 |
| 1730 | HLA-A*31:01 | orf1ab polyprotein | 4841 | 4849 | 9  | AISDYDYR   | Consensus (ann/smm) | 0.28 |
| 1731 | HLA-A*33:03 | orf1ab polyprotein | 65   | 73   | 9  | EQPYVFIKR  | netmhcpa_el         | 0.28 |
| 1732 | HLA-A*33:03 | orf1ab polyprotein | 571  | 579  | 9  | DGISQYSLR  | netmhcpa_el         | 0.28 |
| 1733 | HLA-A*33:03 | orf1ab polyprotein | 1558 | 1566 | 9  | TLLSLREVR  | netmhcpa_el         | 0.28 |
| 1734 | HLA-A*33:03 | orf1ab polyprotein | 3259 | 3267 | 9  | SAVLQSGFR  | netmhcpa_el         | 0.28 |
| 1735 | HLA-A*33:03 | orf1ab polyprotein | 2002 | 2011 | 10 | TYKPNTWCIR | netmhcpa_el         | 0.28 |
| 1736 | HLA-A*33:03 | orf1ab polyprotein | 2717 | 2726 | 10 | DFMSLSEQLR | netmhcpa_el         | 0.28 |

|      |             |                    |      |      |    |             |                     |      |
|------|-------------|--------------------|------|------|----|-------------|---------------------|------|
| 1737 | HLA-A*33:03 | orf1ab polyprotein | 4840 | 4849 | 10 | AAISDYDYR   | netmhcpa_el         | 0.28 |
| 1738 | HLA-A*33:03 | orf1ab polyprotein | 4938 | 4947 | 10 | YAISAKNRAR  | netmhcpa_el         | 0.28 |
| 1739 | HLA-A*33:03 | orf1ab polyprotein | 6667 | 6676 | 10 | ELAMDEFIER  | netmhcpa_el         | 0.28 |
| 1740 | HLA-A*03:01 | orf1ab polyprotein | 4168 | 4176 | 9  | ALAYYNTTK   | Consensus (ann/smm) | 0.27 |
| 1741 | HLA-A*03:01 | orf1ab polyprotein | 728  | 737  | 10 | GLLMPLKAPK  | Consensus (ann/smm) | 0.27 |
| 1742 | HLA-A*03:01 | orf1ab polyprotein | 121  | 129  | 9  | VLLRKNGNK   | Consensus (ann/smm) | 0.27 |
| 1743 | HLA-A*03:01 | orf1ab polyprotein | 3392 | 3400 | 9  | AMRPNFTIK   | Consensus (ann/smm) | 0.27 |
| 1744 | HLA-A*03:01 | orf1ab polyprotein | 2914 | 2923 | 10 | VLAAECTIFK  | Consensus (ann/smm) | 0.27 |
| 1745 | HLA-A*03:01 | orf1ab polyprotein | 4752 | 4761 | 10 | NLHSSRLSFK  | Consensus (ann/smm) | 0.27 |
| 1746 | HLA-A*11:01 | orf1ab polyprotein | 4029 | 4039 | 11 | MQTMLFTMLRK | Consensus (ann/smm) | 0.27 |
| 1747 | HLA-A*11:01 | orf1ab polyprotein | 2345 | 2353 | 9  | AIMQLFFSY   | Consensus (ann/smm) | 0.27 |
| 1748 | HLA-A*11:01 | orf1ab polyprotein | 2499 | 2507 | 9  | GSIHLYFDK   | Consensus (ann/smm) | 0.27 |
| 1749 | HLA-A*11:01 | orf1ab polyprotein | 2405 | 2414 | 10 | NSSTCMMCYK  | Consensus (ann/smm) | 0.27 |
| 1750 | HLA-A*11:01 | orf1ab polyprotein | 282  | 290  | 9  | KTIQPRVEK   | Consensus (ann/smm) | 0.27 |
| 1751 | HLA-A*11:01 | orf1ab polyprotein | 5978 | 5986 | 9  | RLISMMGFK   | Consensus (ann/smm) | 0.27 |
| 1752 | HLA-A*24:02 | orf1ab polyprotein | 905  | 914  | 10 | YYLFDSEGEF  | Consensus (ann/smm) | 0.27 |
| 1753 | HLA-A*24:02 | orf1ab polyprotein | 4677 | 4686 | 10 | RYFKYWDQTY  | Consensus (ann/smm) | 0.27 |
| 1754 | HLA-A*26:01 | orf1ab polyprotein | 670  | 678  | 9  | EIKESVQTF   | Consensus (ann/smm) | 0.27 |
| 1755 | HLA-A*26:01 | orf1ab polyprotein | 1582 | 1590 | 9  | QVVDMSMTY   | Consensus (ann/smm) | 0.27 |
| 1756 | HLA-A*26:01 | orf1ab polyprotein | 2456 | 2464 | 9  | DTEFCAGSTF  | Consensus (ann/smm) | 0.27 |
| 1757 | HLA-A*26:01 | orf1ab polyprotein | 5251 | 5259 | 9  | FVSLAIDAY   | Consensus (ann/smm) | 0.27 |
| 1758 | HLA-A*26:01 | orf1ab polyprotein | 5286 | 5295 | 10 | ELTGHMLDMY  | Consensus (ann/smm) | 0.27 |
| 1759 | HLA-A*33:03 | orf1ab polyprotein | 4565 | 4573 | 9  | RVYANLGER   | netmhcpa_el         | 0.27 |
| 1760 | HLA-A*33:03 | orf1ab polyprotein | 1154 | 1163 | 10 | FGADPIHSLR  | netmhcpa_el         | 0.27 |
| 1761 | HLA-A*33:03 | orf1ab polyprotein | 1309 | 1318 | 10 | TTEMLAKALR  | netmhcpa_el         | 0.27 |
| 1762 | HLA-A*33:03 | orf1ab polyprotein | 2462 | 2471 | 10 | STFISDEVAR  | netmhcpa_el         | 0.27 |
| 1763 | HLA-A*33:03 | orf1ab polyprotein | 3154 | 3163 | 10 | YWFFSNYLKR  | netmhcpa_el         | 0.27 |
| 1764 | HLA-A*33:03 | orf1ab polyprotein | 4556 | 4565 | 10 | DFVENPDILR  | netmhcpa_el         | 0.27 |
| 1765 | HLA-A*33:03 | orf1ab polyprotein | 6504 | 6513 | 10 | NVAFELWAKR  | netmhcpa_el         | 0.27 |

|      |             |                    |      |      |    |             |                                        |      |
|------|-------------|--------------------|------|------|----|-------------|----------------------------------------|------|
| 1766 | HLA-A*02:01 | orf1ab polyprotein | 3085 | 3093 | 9  | FLMSFTVLC   | Consensus (ann/comblib_sidney2008/smm) | 0.26 |
| 1767 | HLA-A*02:06 | orf1ab polyprotein | 4265 | 4274 | 10 | TVLSFCAFAV  | Consensus (ann/smm)                    | 0.26 |
| 1768 | HLA-A*02:06 | orf1ab polyprotein | 1083 | 1091 | 9  | MQVESDDYI   | Consensus (ann/smm)                    | 0.26 |
| 1769 | HLA-A*02:06 | orf1ab polyprotein | 1804 | 1812 | 9  | FVMMSAPPA   | Consensus (ann/smm)                    | 0.26 |
| 1770 | HLA-A*02:06 | orf1ab polyprotein | 4514 | 4522 | 9  | YTMADLVYA   | Consensus (ann/smm)                    | 0.26 |
| 1771 | HLA-A*03:01 | orf1ab polyprotein | 4673 | 4681 | 9  | KLFDRYFKY   | Consensus (ann/smm)                    | 0.26 |
| 1772 | HLA-A*11:01 | orf1ab polyprotein | 1271 | 1280 | 10 | VSDIDITFLK  | Consensus (ann/smm)                    | 0.26 |
| 1773 | HLA-A*11:01 | orf1ab polyprotein | 3711 | 3720 | 10 | LMNVLTLYK   | Consensus (ann/smm)                    | 0.26 |
| 1774 | HLA-A*11:01 | orf1ab polyprotein | 1504 | 1512 | 9  | TISLAGSYK   | Consensus (ann/smm)                    | 0.26 |
| 1775 | HLA-A*24:02 | orf1ab polyprotein | 6435 | 6444 | 10 | VYKQFDYNL   | Consensus (ann/smm)                    | 0.26 |
| 1776 | HLA-A*24:02 | orf1ab polyprotein | 2300 | 2309 | 10 | TYPESLETIQI | Consensus (ann/smm)                    | 0.26 |
| 1777 | HLA-A*26:01 | orf1ab polyprotein | 328  | 336  | 9  | ETSWQTGDF   | Consensus (ann/smm)                    | 0.26 |
| 1778 | HLA-A*26:01 | orf1ab polyprotein | 3076 | 3085 | 10 | HVVAFNLLF   | Consensus (ann/smm)                    | 0.26 |
| 1779 | HLA-A*26:01 | orf1ab polyprotein | 709  | 717  | 9  | FVTHSKGLY   | Consensus (ann/smm)                    | 0.26 |
| 1780 | HLA-A*26:01 | orf1ab polyprotein | 3089 | 3098 | 10 | FTVLCLTPVY  | Consensus (ann/smm)                    | 0.26 |
| 1781 | HLA-A*31:01 | orf1ab polyprotein | 4009 | 4017 | 9  | MTQMYKQAR   | Consensus (ann/smm)                    | 0.26 |
| 1782 | HLA-A*33:03 | orf1ab polyprotein | 2140 | 2148 | 9  | NYAKPFLNK   | netmhcpa_el                            | 0.26 |
| 1783 | HLA-A*33:03 | orf1ab polyprotein | 6195 | 6203 | 9  | ASCDAIMTR   | netmhcpa_el                            | 0.26 |
| 1784 | HLA-A*33:03 | orf1ab polyprotein | 3653 | 3662 | 10 | VYMPASWVMR  | netmhcpa_el                            | 0.26 |
| 1785 | HLA-A*33:03 | orf1ab polyprotein | 4501 | 4510 | 10 | DMVPHISRQR  | netmhcpa_el                            | 0.26 |
| 1786 | HLA-A*01:01 | orf1ab polyprotein | 1248 | 1256 | 9  | FLTENLLLY   | Consensus (ann/smm)                    | 0.25 |
| 1787 | HLA-A*01:01 | orf1ab polyprotein | 6667 | 6677 | 11 | ELAMDEFIERY | Consensus (ann/smm)                    | 0.25 |
| 1788 | HLA-A*02:01 | orf1ab polyprotein | 2347 | 2356 | 10 | MQLFFSYFAV  | Consensus (ann/smm)                    | 0.25 |
| 1789 | HLA-A*02:06 | orf1ab polyprotein | 1291 | 1299 | 9  | VQEGVLTAV   | Consensus (ann/smm)                    | 0.25 |
| 1790 | HLA-A*24:02 | orf1ab polyprotein | 3114 | 3122 | 9  | FYLTDVVSF   | Consensus (ann/smm)                    | 0.25 |
| 1791 | HLA-A*26:01 | orf1ab polyprotein | 4926 | 4934 | 9  | NVIPTITQM   | Consensus (ann/smm)                    | 0.25 |
| 1792 | HLA-A*26:01 | orf1ab polyprotein | 4421 | 4430 | 10 | DVVYRAFDIY  | Consensus (ann/smm)                    | 0.25 |
| 1793 | HLA-A*33:03 | orf1ab polyprotein | 5822 | 5831 | 10 | EFLTRNPAWR  | netmhcpa_el                            | 0.25 |
| 1794 | HLA-A*01:01 | orf1ab polyprotein | 3709 | 3719 | 11 | WTLMNVLTLYV | Consensus (ann/smm)                    | 0.24 |

|      |             |                    |      |      |    |            |                     |      |
|------|-------------|--------------------|------|------|----|------------|---------------------|------|
| 1795 | HLA-A*02:06 | orf1ab polyprotein | 6077 | 6086 | 10 | LMYKGLPWNV | Consensus (ann/smm) | 0.24 |
| 1796 | HLA-A*02:06 | orf1ab polyprotein | 6160 | 6169 | 10 | YVYNPFMIDV | Consensus (ann/smm) | 0.24 |
| 1797 | HLA-A*03:01 | orf1ab polyprotein | 5059 | 5068 | 10 | VMCGSGLYVK | Consensus (ann/smm) | 0.24 |
| 1798 | HLA-A*03:01 | orf1ab polyprotein | 808  | 816  | 9  | VTNNTFTLK  | Consensus (ann/smm) | 0.24 |
| 1799 | HLA-A*03:01 | orf1ab polyprotein | 6699 | 6708 | 10 | GLHLLIGLAK | Consensus (ann/smm) | 0.24 |
| 1800 | HLA-A*24:02 | orf1ab polyprotein | 1634 | 1642 | 9  | YYHTTDPFSF | Consensus (ann/smm) | 0.24 |
| 1801 | HLA-A*24:02 | orf1ab polyprotein | 7035 | 7043 | 9  | IQLSSYSLF  | Consensus (ann/smm) | 0.24 |
| 1802 | HLA-A*24:02 | orf1ab polyprotein | 181  | 190  | 10 | AYTRYVDNNF | Consensus (ann/smm) | 0.24 |
| 1803 | HLA-A*24:02 | orf1ab polyprotein | 5540 | 5549 | 10 | TYKLNVDGYF | Consensus (ann/smm) | 0.24 |
| 1804 | HLA-A*24:02 | orf1ab polyprotein | 2382 | 2390 | 9  | RMYYIFFASF | Consensus (ann/smm) | 0.24 |
| 1805 | HLA-A*26:01 | orf1ab polyprotein | 3355 | 3364 | 10 | DTANPKTPKY | Consensus (ann/smm) | 0.24 |
| 1806 | HLA-A*31:01 | orf1ab polyprotein | 634  | 643  | 10 | KFKEGVEFLR | Consensus (ann/smm) | 0.24 |
| 1807 | HLA-A*31:01 | orf1ab polyprotein | 3796 | 3805 | 10 | LFCLLNRYFR | Consensus (ann/smm) | 0.24 |
| 1808 | HLA-A*33:03 | orf1ab polyprotein | 2155 | 2163 | 9  | NIVTRCLNR  | netmhcpa_el         | 0.24 |
| 1809 | HLA-A*33:03 | orf1ab polyprotein | 3060 | 3068 | 9  | LAYYFMRFR  | netmhcpa_el         | 0.24 |
| 1810 | HLA-A*33:03 | orf1ab polyprotein | 3813 | 3821 | 9  | YLVSTQEFR  | netmhcpa_el         | 0.24 |
| 1811 | HLA-A*33:03 | orf1ab polyprotein | 4417 | 4425 | 9  | GTSTDVVYR  | netmhcpa_el         | 0.24 |
| 1812 | HLA-A*33:03 | orf1ab polyprotein | 5910 | 5918 | 9  | QFTSLEIPR  | netmhcpa_el         | 0.24 |
| 1813 | HLA-A*33:03 | orf1ab polyprotein | 2809 | 2818 | 10 | YKAIDGGVTR | netmhcpa_el         | 0.24 |
| 1814 | HLA-A*01:01 | orf1ab polyprotein | 241  | 249  | 9  | YTERSEKSY  | Consensus (ann/smm) | 0.23 |
| 1815 | HLA-A*01:01 | orf1ab polyprotein | 2092 | 2100 | 9  | HTDLMAAYV  | Consensus (ann/smm) | 0.23 |
| 1816 | HLA-A*01:01 | orf1ab polyprotein | 7031 | 7040 | 10 | NTNPIQLSSY | Consensus (ann/smm) | 0.23 |
| 1817 | HLA-A*02:01 | orf1ab polyprotein | 3082 | 3091 | 10 | TLLFLMSFTV | Consensus (ann/smm) | 0.23 |
| 1818 | HLA-A*02:06 | orf1ab polyprotein | 4252 | 4260 | 9  | LQAGNATEV  | Consensus (ann/smm) | 0.23 |
| 1819 | HLA-A*02:06 | orf1ab polyprotein | 5246 | 5254 | 9  | LMIERFVSL  | Consensus (ann/smm) | 0.23 |
| 1820 | HLA-A*02:06 | orf1ab polyprotein | 860  | 868  | 9  | YTVELGTEV  | Consensus (ann/smm) | 0.23 |
| 1821 | HLA-A*03:01 | orf1ab polyprotein | 116  | 125  | 10 | VAYRKVLLRK | Consensus (ann/smm) | 0.23 |
| 1822 | HLA-A*03:01 | orf1ab polyprotein | 1185 | 1194 | 10 | KLVSSFLEMK | Consensus (ann/smm) | 0.23 |
| 1823 | HLA-A*03:01 | orf1ab polyprotein | 2076 | 2085 | 10 | ILKPANNSLK | Consensus (ann/smm) | 0.23 |

|      |             |                    |      |      |    |            |                     |      |
|------|-------------|--------------------|------|------|----|------------|---------------------|------|
| 1824 | HLA-A*03:01 | orf1ab polyprotein | 4716 | 4724 | 9  | TSFGPLVRK  | Consensus (ann/smm) | 0.23 |
| 1825 | HLA-A*11:01 | orf1ab polyprotein | 3260 | 3268 | 9  | AVLQSGFRK  | Consensus (ann/smm) | 0.23 |
| 1826 | HLA-A*11:01 | orf1ab polyprotein | 2822 | 2830 | 9  | STDTCFANK  | Consensus (ann/smm) | 0.23 |
| 1827 | HLA-A*24:02 | orf1ab polyprotein | 6294 | 6302 | 9  | SYATHSDKF  | Consensus (ann/smm) | 0.23 |
| 1828 | HLA-A*24:02 | orf1ab polyprotein | 2512 | 2521 | 10 | TYERHLSHF  | Consensus (ann/smm) | 0.23 |
| 1829 | HLA-A*24:02 | orf1ab polyprotein | 2560 | 2569 | 10 | YSQLMCQPI  | Consensus (ann/smm) | 0.23 |
| 1830 | HLA-A*24:02 | orf1ab polyprotein | 3009 | 3018 | 10 | DYYRSLPGVF | Consensus (ann/smm) | 0.23 |
| 1831 | HLA-A*24:02 | orf1ab polyprotein | 6159 | 6167 | 9  | DYVYNPFMI  | Consensus (ann/smm) | 0.23 |
| 1832 | HLA-A*26:01 | orf1ab polyprotein | 3055 | 3063 | 9  | IVVTCLAYY  | Consensus (ann/smm) | 0.23 |
| 1833 | HLA-A*26:01 | orf1ab polyprotein | 3106 | 3114 | 9  | SVIYLYLTF  | Consensus (ann/smm) | 0.23 |
| 1834 | HLA-A*26:01 | orf1ab polyprotein | 2495 | 2504 | 10 | TVKNGSIHLY | Consensus (ann/smm) | 0.23 |
| 1835 | HLA-A*26:01 | orf1ab polyprotein | 176  | 185  | 10 | ELNGGAYTRY | Consensus (ann/smm) | 0.23 |
| 1836 | HLA-A*31:01 | orf1ab polyprotein | 5023 | 5032 | 10 | RIMASLVLAR | Consensus (ann/smm) | 0.23 |
| 1837 | HLA-A*31:01 | orf1ab polyprotein | 5037 | 5046 | 10 | CCSLSHRFYR | Consensus (ann/smm) | 0.23 |
| 1838 | HLA-A*31:01 | orf1ab polyprotein | 6121 | 6130 | 10 | KYFVKIGPER | Consensus (ann/smm) | 0.23 |
| 1839 | HLA-A*31:01 | orf1ab polyprotein | 2409 | 2417 | 9  | CMMCYKRNR  | Consensus (ann/smm) | 0.23 |
| 1840 | HLA-A*01:01 | orf1ab polyprotein | 6669 | 6677 | 9  | AMDEFIERY  | Consensus (ann/smm) | 0.22 |
| 1841 | HLA-A*01:01 | orf1ab polyprotein | 487  | 496  | 10 | FVETVKGLDY | Consensus (ann/smm) | 0.22 |
| 1842 | HLA-A*01:01 | orf1ab polyprotein | 1891 | 1900 | 10 | EIDPKLDNYY | Consensus (ann/smm) | 0.22 |
| 1843 | HLA-A*02:06 | orf1ab polyprotein | 3710 | 3718 | 9  | TLMNVLTIV  | Consensus (ann/smm) | 0.22 |
| 1844 | HLA-A*24:02 | orf1ab polyprotein | 3104 | 3112 | 9  | VYSVIYLYL  | Consensus (ann/smm) | 0.22 |
| 1845 | HLA-A*26:01 | orf1ab polyprotein | 3903 | 3911 | 9  | DTTEAFEKM  | Consensus (ann/smm) | 0.22 |
| 1846 | HLA-A*33:03 | orf1ab polyprotein | 3654 | 3662 | 9  | YMPASWVMR  | netmhcpa_el         | 0.22 |
| 1847 | HLA-A*01:01 | orf1ab polyprotein | 5464 | 5473 | 10 | ATEETFKLSY | Consensus (ann/smm) | 0.21 |
| 1848 | HLA-A*01:01 | orf1ab polyprotein | 5772 | 5781 | 10 | IVDTVSALVY | Consensus (ann/smm) | 0.21 |
| 1849 | HLA-A*02:06 | orf1ab polyprotein | 6749 | 6757 | 9  | LLDDFVEI   | Consensus (ann/smm) | 0.21 |
| 1850 | HLA-A*02:06 | orf1ab polyprotein | 2780 | 2789 | 10 | FLFVAIFYL  | Consensus (ann/smm) | 0.21 |
| 1851 | HLA-A*02:06 | orf1ab polyprotein | 6365 | 6373 | 9  | KQLPFFYYS  | Consensus (ann/smm) | 0.21 |
| 1852 | HLA-A*02:06 | orf1ab polyprotein | 6695 | 6703 | 9  | SQLGGLHLL  | Consensus (ann/smm) | 0.21 |

|      |             |                    |      |      |    |              |                                        |      |
|------|-------------|--------------------|------|------|----|--------------|----------------------------------------|------|
| 1853 | HLA-A*03:01 | orf1ab polyprotein | 4892 | 4900 | 9  | KSAGFPFNK    | Consensus (ann/smm)                    | 0.21 |
| 1854 | HLA-A*03:01 | orf1ab polyprotein | 2600 | 2610 | 11 | STFNVPMEKLLK | Consensus (ann/smm)                    | 0.21 |
| 1855 | HLA-A*11:01 | orf1ab polyprotein | 1057 | 1066 | 10 | VVNAANVYLK   | Consensus (ann/smm)                    | 0.21 |
| 1856 | HLA-A*11:01 | orf1ab polyprotein | 5533 | 5542 | 10 | VVYRGTTTYK   | Consensus (ann/smm)                    | 0.21 |
| 1857 | HLA-A*11:01 | orf1ab polyprotein | 2406 | 2414 | 9  | SSTCMMCYK    | Consensus (ann/smm)                    | 0.21 |
| 1858 | HLA-A*11:01 | orf1ab polyprotein | 6668 | 6678 | 11 | LAMDEFIERYK  | Consensus (ann/smm)                    | 0.21 |
| 1859 | HLA-A*11:01 | orf1ab polyprotein | 6117 | 6125 | 9  | LTSMKYFVK    | Consensus (ann/smm)                    | 0.21 |
| 1860 | HLA-A*24:02 | orf1ab polyprotein | 3821 | 3829 | 9  | RYMNSQGLL    | Consensus (ann/smm)                    | 0.21 |
| 1861 | HLA-A*26:01 | orf1ab polyprotein | 5689 | 5697 | 9  | ETTADIVVF    | Consensus (ann/smm)                    | 0.21 |
| 1862 | HLA-A*31:01 | orf1ab polyprotein | 419  | 426  | 8  | KCAYWVPR     | ann                                    | 0.21 |
| 1863 | HLA-A*33:03 | orf1ab polyprotein | 1155 | 1163 | 9  | GADPIHSLR    | netmhcpa_el                            | 0.21 |
| 1864 | HLA-A*33:03 | orf1ab polyprotein | 6701 | 6709 | 9  | HLLIGLAKR    | netmhcpa_el                            | 0.21 |
| 1865 | HLA-A*33:03 | orf1ab polyprotein | 68   | 77   | 10 | YVFIKRSAR    | netmhcpa_el                            | 0.21 |
| 1866 | HLA-A*33:03 | orf1ab polyprotein | 5705 | 5714 | 10 | NYDLSVNNAR   | netmhcpa_el                            | 0.21 |
| 1867 | HLA-A*01:01 | orf1ab polyprotein | 2323 | 2331 | 9  | LVAEWFLAY    | Consensus (ann/smm)                    | 0.2  |
| 1868 | HLA-A*01:01 | orf1ab polyprotein | 2405 | 2413 | 9  | NSSTCMMCY    | Consensus (ann/smm)                    | 0.2  |
| 1869 | HLA-A*01:01 | orf1ab polyprotein | 3711 | 3719 | 9  | LMNVLTLYV    | Consensus (ann/smm)                    | 0.2  |
| 1870 | HLA-A*01:01 | orf1ab polyprotein | 5287 | 5295 | 9  | LTGHMLDMY    | Consensus (ann/smm)                    | 0.2  |
| 1871 | HLA-A*01:01 | orf1ab polyprotein | 3308 | 3317 | 10 | TSEDMLNPNY   | Consensus (ann/smm)                    | 0.2  |
| 1872 | HLA-A*02:01 | orf1ab polyprotein | 2332 | 2340 | 9  | ILFTRFFYV    | Consensus (ann/comblib_sidney2008/smm) | 0.2  |
| 1873 | HLA-A*02:01 | orf1ab polyprotein | 2363 | 2371 | 9  | WLMWLIINL    | Consensus (ann/comblib_sidney2008/smm) | 0.2  |
| 1874 | HLA-A*02:01 | orf1ab polyprotein | 2364 | 2372 | 9  | LMWLIINLV    | Consensus (ann/comblib_sidney2008/smm) | 0.2  |
| 1875 | HLA-A*02:01 | orf1ab polyprotein | 3083 | 3091 | 9  | LLFLMSFTV    | Consensus (ann/comblib_sidney2008/smm) | 0.2  |
| 1876 | HLA-A*02:01 | orf1ab polyprotein | 3122 | 3130 | 9  | FLAHIQWMV    | Consensus (ann/comblib_sidney2008/smm) | 0.2  |
| 1877 | HLA-A*02:01 | orf1ab polyprotein | 3183 | 3191 | 9  | FLLNKEMYL    | Consensus (ann/comblib_sidney2008/smm) | 0.2  |
| 1878 | HLA-A*02:01 | orf1ab polyprotein | 3639 | 3647 | 9  | FLLPSLATV    | Consensus (ann/comblib_sidney2008/smm) | 0.2  |
| 1879 | HLA-A*02:01 | orf1ab polyprotein | 3710 | 3718 | 9  | TLMNVLTLYV   | Consensus (ann/comblib_sidney2008/smm) | 0.2  |
| 1880 | HLA-A*02:01 | orf1ab polyprotein | 3732 | 3740 | 9  | SMWALIISV    | Consensus (ann/comblib_sidney2008/smm) | 0.2  |
| 1881 | HLA-A*02:06 | orf1ab polyprotein | 6659 | 6668 | 10 | SQMEIDFLEL   | Consensus (ann/smm)                    | 0.2  |

|      |             |                    |      |      |    |             |                     |      |
|------|-------------|--------------------|------|------|----|-------------|---------------------|------|
| 1882 | HLA-A*02:06 | orf1ab polyprotein | 4514 | 4523 | 10 | YTMADLVYAL  | Consensus (ann/smm) | 0.2  |
| 1883 | HLA-A*02:06 | orf1ab polyprotein | 4859 | 4867 | 9  | RQLLFVVEV   | Consensus (ann/smm) | 0.2  |
| 1884 | HLA-A*03:01 | orf1ab polyprotein | 6806 | 6814 | 9  | GVAMPNLYK   | Consensus (ann/smm) | 0.2  |
| 1885 | HLA-A*11:01 | orf1ab polyprotein | 5587 | 5595 | 9  | SSNVANYQK   | Consensus (ann/smm) | 0.2  |
| 1886 | HLA-A*24:02 | orf1ab polyprotein | 2330 | 2338 | 9  | AYILFTRFF   | Consensus (ann/smm) | 0.2  |
| 1887 | HLA-A*24:02 | orf1ab polyprotein | 6676 | 6684 | 9  | RYKLEGYAF   | Consensus (ann/smm) | 0.2  |
| 1888 | HLA-A*24:02 | orf1ab polyprotein | 3159 | 3167 | 9  | NYLKRRVVF   | Consensus (ann/smm) | 0.2  |
| 1889 | HLA-A*26:01 | orf1ab polyprotein | 1443 | 1452 | 10 | ETLVTMPLGY  | Consensus (ann/smm) | 0.2  |
| 1890 | HLA-A*33:03 | orf1ab polyprotein | 615  | 623  | 9  | NIFGTVYEK   | netmhcpa_el         | 0.2  |
| 1891 | HLA-A*33:03 | orf1ab polyprotein | 4171 | 4179 | 9  | YYNTTKGGR   | netmhcpa_el         | 0.2  |
| 1892 | HLA-A*33:03 | orf1ab polyprotein | 7073 | 7081 | 9  | LSKGRLIIR   | netmhcpa_el         | 0.2  |
| 1893 | HLA-A*01:01 | orf1ab polyprotein | 221  | 229  | 9  | FIDTKRGVY   | Consensus (ann/smm) | 0.19 |
| 1894 | HLA-A*03:01 | orf1ab polyprotein | 1645 | 1654 | 10 | RYMSALNHTK  | Consensus (ann/smm) | 0.19 |
| 1895 | HLA-A*03:01 | orf1ab polyprotein | 3523 | 3532 | 10 | AVLDMCASLK  | Consensus (ann/smm) | 0.19 |
| 1896 | HLA-A*03:01 | orf1ab polyprotein | 7051 | 7061 | 11 | KLRGTAVMSLK | Consensus (ann/smm) | 0.19 |
| 1897 | HLA-A*11:01 | orf1ab polyprotein | 2021 | 2029 | 9  | TSNSFDVLK   | Consensus (ann/smm) | 0.19 |
| 1898 | HLA-A*24:02 | orf1ab polyprotein | 1899 | 1907 | 9  | YYKKDNSYF   | Consensus (ann/smm) | 0.19 |
| 1899 | HLA-A*26:01 | orf1ab polyprotein | 4978 | 4987 | 10 | TVVIGTSKFY  | Consensus (ann/smm) | 0.19 |
| 1900 | HLA-A*31:01 | orf1ab polyprotein | 4402 | 4410 | 9  | RVCVSAAR    | Consensus (ann/smm) | 0.19 |
| 1901 | HLA-A*33:03 | orf1ab polyprotein | 4801 | 4809 | 9  | TVKPGNFNK   | netmhcpa_el         | 0.19 |
| 1902 | HLA-A*01:01 | orf1ab polyprotein | 4867 | 4875 | 9  | VVDKYFDCY   | Consensus (ann/smm) | 0.18 |
| 1903 | HLA-A*02:01 | orf1ab polyprotein | 3731 | 3740 | 10 | ISMWALIISV  | Consensus (ann/smm) | 0.18 |
| 1904 | HLA-A*02:01 | orf1ab polyprotein | 5058 | 5067 | 10 | MVMCGGSLYV  | Consensus (ann/smm) | 0.18 |
| 1905 | HLA-A*02:06 | orf1ab polyprotein | 6382 | 6391 | 10 | KQVVSIDYV   | Consensus (ann/smm) | 0.18 |
| 1906 | HLA-A*02:06 | orf1ab polyprotein | 2347 | 2355 | 9  | MQLFFSYFA   | Consensus (ann/smm) | 0.18 |
| 1907 | HLA-A*02:06 | orf1ab polyprotein | 3369 | 3377 | 9  | IQPGQTFVS   | Consensus (ann/smm) | 0.18 |
| 1908 | HLA-A*03:01 | orf1ab polyprotein | 6814 | 6822 | 9  | KMQRMLLEK   | Consensus (ann/smm) | 0.18 |
| 1909 | HLA-A*03:01 | orf1ab polyprotein | 5386 | 5395 | 10 | QLYLGGMSYY  | Consensus (ann/smm) | 0.18 |
| 1910 | HLA-A*11:01 | orf1ab polyprotein | 676  | 684  | 9  | QTFFKLVNK   | Consensus (ann/smm) | 0.18 |

|      |             |                    |      |      |    |             |                     |      |
|------|-------------|--------------------|------|------|----|-------------|---------------------|------|
| 1911 | HLA-A*11:01 | orf1ab polyprotein | 5791 | 5801 | 11 | KSAQCFKMFYK | Consensus (ann/smm) | 0.18 |
| 1912 | HLA-A*11:01 | orf1ab polyprotein | 1772 | 1781 | 10 | GTLSYEQFKK  | Consensus (ann/smm) | 0.18 |
| 1913 | HLA-A*11:01 | orf1ab polyprotein | 1874 | 1883 | 10 | TTTIKPVTYK  | Consensus (ann/smm) | 0.18 |
| 1914 | HLA-A*24:02 | orf1ab polyprotein | 3108 | 3116 | 9  | IYLYLTFYL   | Consensus (ann/smm) | 0.18 |
| 1915 | HLA-A*24:02 | orf1ab polyprotein | 4628 | 4636 | 9  | SYSSLMPI    | Consensus (ann/smm) | 0.18 |
| 1916 | HLA-A*24:02 | orf1ab polyprotein | 6422 | 6431 | 10 | AYNMMISAGF  | Consensus (ann/smm) | 0.18 |
| 1917 | HLA-A*24:02 | orf1ab polyprotein | 6148 | 6158 | 11 | TYACWHHSIGF | Consensus (ann/smm) | 0.18 |
| 1918 | HLA-A*26:01 | orf1ab polyprotein | 4071 | 4080 | 10 | MVVIPDYNTY  | Consensus (ann/smm) | 0.18 |
| 1919 | HLA-A*31:01 | orf1ab polyprotein | 3360 | 3368 | 9  | KTPKYKFVR   | Consensus (ann/smm) | 0.18 |
| 1920 | HLA-A*31:01 | orf1ab polyprotein | 7021 | 7030 | 10 | VMHANYIFWR  | Consensus (ann/smm) | 0.18 |
| 1921 | HLA-A*33:03 | orf1ab polyprotein | 1945 | 1953 | 9  | TGYKKPASR   | netmhcpa_el         | 0.18 |
| 1922 | HLA-A*33:03 | orf1ab polyprotein | 5876 | 5884 | 9  | TAHSCNVNR   | netmhcpa_el         | 0.18 |
| 1923 | HLA-A*33:03 | orf1ab polyprotein | 6015 | 6023 | 9  | DVEGCHATR   | netmhcpa_el         | 0.18 |
| 1924 | HLA-A*01:01 | orf1ab polyprotein | 1827 | 1836 | 10 | YTGNYQCGHY  | Consensus (ann/smm) | 0.17 |
| 1925 | HLA-A*01:01 | orf1ab polyprotein | 5856 | 5865 | 10 | TVDSSQGSEY  | Consensus (ann/smm) | 0.17 |
| 1926 | HLA-A*01:01 | orf1ab polyprotein | 3945 | 3954 | 10 | ASEFSSLPSY  | Consensus (ann/smm) | 0.17 |
| 1927 | HLA-A*02:01 | orf1ab polyprotein | 7041 | 7050 | 10 | SLFDMSKFPL  | Consensus (ann/smm) | 0.17 |
| 1928 | HLA-A*02:06 | orf1ab polyprotein | 3122 | 3130 | 9  | FLAHIQWMV   | Consensus (ann/smm) | 0.17 |
| 1929 | HLA-A*02:06 | orf1ab polyprotein | 2782 | 2790 | 9  | FVAEIFYLI   | Consensus (ann/smm) | 0.17 |
| 1930 | HLA-A*03:01 | orf1ab polyprotein | 1768 | 1776 | 9  | VMYMGTLISY  | Consensus (ann/smm) | 0.17 |
| 1931 | HLA-A*03:01 | orf1ab polyprotein | 4671 | 4680 | 10 | RLKLFDRYFK  | Consensus (ann/smm) | 0.17 |
| 1932 | HLA-A*03:01 | orf1ab polyprotein | 3179 | 3187 | 9  | ALCTFLLNK   | Consensus (ann/smm) | 0.17 |
| 1933 | HLA-A*03:01 | orf1ab polyprotein | 2600 | 2608 | 9  | STFNVPMEK   | Consensus (ann/smm) | 0.17 |
| 1934 | HLA-A*03:01 | orf1ab polyprotein | 1767 | 1776 | 10 | AVMYMGTLISY | Consensus (ann/smm) | 0.17 |
| 1935 | HLA-A*11:01 | orf1ab polyprotein | 2191 | 2200 | 10 | KASMPPTIAK  | Consensus (ann/smm) | 0.17 |
| 1936 | HLA-A*11:01 | orf1ab polyprotein | 3179 | 3187 | 9  | ALCTFLLNK   | Consensus (ann/smm) | 0.17 |
| 1937 | HLA-A*11:01 | orf1ab polyprotein | 4030 | 4038 | 9  | QTMLFTMLR   | Consensus (ann/smm) | 0.17 |
| 1938 | HLA-A*11:01 | orf1ab polyprotein | 6625 | 6633 | 9  | KTQFNYYKK   | Consensus (ann/smm) | 0.17 |
| 1939 | HLA-A*11:01 | orf1ab polyprotein | 4031 | 4039 | 9  | TMLFTMLRK   | Consensus (ann/smm) | 0.17 |

|      |             |                    |      |      |    |             |                     |      |
|------|-------------|--------------------|------|------|----|-------------|---------------------|------|
| 1940 | HLA-A*24:02 | orf1ab polyprotein | 900  | 908  | 9  | WSMATYYLF   | Consensus (ann/smm) | 0.17 |
| 1941 | HLA-A*24:02 | orf1ab polyprotein | 2386 | 2394 | 9  | FFASFYYVW   | Consensus (ann/smm) | 0.17 |
| 1942 | HLA-A*24:02 | orf1ab polyprotein | 3010 | 3018 | 9  | YYRSLPGVF   | Consensus (ann/smm) | 0.17 |
| 1943 | HLA-A*24:02 | orf1ab polyprotein | 3684 | 3692 | 9  | MYASAVVLL   | Consensus (ann/smm) | 0.17 |
| 1944 | HLA-A*24:02 | orf1ab polyprotein | 3684 | 3693 | 10 | MYASAVLLI   | Consensus (ann/smm) | 0.17 |
| 1945 | HLA-A*26:01 | orf1ab polyprotein | 5271 | 5279 | 9  | DVFHLYLQY   | Consensus (ann/smm) | 0.17 |
| 1946 | HLA-A*26:01 | orf1ab polyprotein | 5615 | 5623 | 9  | FAIGLALYY   | Consensus (ann/smm) | 0.17 |
| 1947 | HLA-A*26:01 | orf1ab polyprotein | 5771 | 5779 | 9  | EIVDTVSAL   | Consensus (ann/smm) | 0.17 |
| 1948 | HLA-A*26:01 | orf1ab polyprotein | 5057 | 5066 | 10 | EMVMCGGSLY  | Consensus (ann/smm) | 0.17 |
| 1949 | HLA-A*26:01 | orf1ab polyprotein | 5268 | 5276 | 9  | EYADVHLY    | Consensus (ann/smm) | 0.17 |
| 1950 | HLA-A*26:01 | orf1ab polyprotein | 1481 | 1489 | 9  | DAVTAYNGY   | Consensus (ann/smm) | 0.17 |
| 1951 | HLA-A*31:01 | orf1ab polyprotein | 542  | 550  | 9  | RVVRSIFSR   | Consensus (ann/smm) | 0.17 |
| 1952 | HLA-A*31:01 | orf1ab polyprotein | 3060 | 3068 | 9  | LAYYFMRFR   | Consensus (ann/smm) | 0.17 |
| 1953 | HLA-A*33:03 | orf1ab polyprotein | 1637 | 1645 | 9  | TTDPSFLGR   | netmhcpa_el         | 0.17 |
| 1954 | HLA-A*33:03 | orf1ab polyprotein | 2600 | 2608 | 9  | STFNVPMEK   | netmhcpa_el         | 0.17 |
| 1955 | HLA-A*33:03 | orf1ab polyprotein | 3156 | 3164 | 9  | FFSNYLKRR   | netmhcpa_el         | 0.17 |
| 1956 | HLA-A*33:03 | orf1ab polyprotein | 4953 | 4961 | 9  | SICSTMTNR   | netmhcpa_el         | 0.17 |
| 1957 | HLA-A*33:03 | orf1ab polyprotein | 5024 | 5032 | 9  | IMASLVLAR   | netmhcpa_el         | 0.17 |
| 1958 | HLA-A*33:03 | orf1ab polyprotein | 5619 | 5627 | 9  | LALYYPSAR   | netmhcpa_el         | 0.17 |
| 1959 | HLA-A*33:03 | orf1ab polyprotein | 162  | 171  | 10 | NTKHSSGVTR  | netmhcpa_el         | 0.17 |
| 1960 | HLA-A*33:03 | orf1ab polyprotein | 1636 | 1645 | 10 | HTTDPFLGR   | netmhcpa_el         | 0.17 |
| 1961 | HLA-A*33:03 | orf1ab polyprotein | 6441 | 6450 | 10 | TYNLWNTFTR  | netmhcpa_el         | 0.17 |
| 1962 | HLA-A*03:01 | orf1ab polyprotein | 1104 | 1112 | 9  | VLSGHNLAK   | Consensus (ann/smm) | 0.16 |
| 1963 | HLA-A*03:01 | orf1ab polyprotein | 4961 | 4969 | 9  | RQFHQKLLK   | Consensus (ann/smm) | 0.16 |
| 1964 | HLA-A*03:01 | orf1ab polyprotein | 3183 | 3192 | 10 | FLLNKEMYLK  | Consensus (ann/smm) | 0.16 |
| 1965 | HLA-A*03:01 | orf1ab polyprotein | 5391 | 5400 | 10 | GMSYYCKSHK  | Consensus (ann/smm) | 0.16 |
| 1966 | HLA-A*24:02 | orf1ab polyprotein | 7039 | 7048 | 10 | SYSLFDM SKF | Consensus (ann/smm) | 0.16 |
| 1967 | HLA-A*31:01 | orf1ab polyprotein | 5118 | 5127 | 10 | RLYECLYRNR  | Consensus (ann/smm) | 0.16 |
| 1968 | HLA-A*33:03 | orf1ab polyprotein | 1875 | 1883 | 9  | TTIKPVTYK   | netmhcpa_el         | 0.16 |

|      |             |                    |      |      |    |            |                     |      |
|------|-------------|--------------------|------|------|----|------------|---------------------|------|
| 1969 | HLA-A*33:03 | orf1ab polyprotein | 2630 | 2638 | 9  | LSTFISAAR  | netmhcpa_el         | 0.16 |
| 1970 | HLA-A*33:03 | orf1ab polyprotein | 4402 | 4410 | 9  | RVCGVSAAR  | netmhcpa_el         | 0.16 |
| 1971 | HLA-A*33:03 | orf1ab polyprotein | 6856 | 6864 | 9  | TLAVPYNMR  | netmhcpa_el         | 0.16 |
| 1972 | HLA-A*33:03 | orf1ab polyprotein | 709  | 718  | 10 | FVTHSKGLYR | netmhcpa_el         | 0.16 |
| 1973 | HLA-A*33:03 | orf1ab polyprotein | 4732 | 4741 | 10 | FVVSTGYHFR | netmhcpa_el         | 0.16 |
| 1974 | HLA-A*01:01 | orf1ab polyprotein | 613  | 621  | 9  | LTNIFGTVY  | Consensus (ann/smm) | 0.15 |
| 1975 | HLA-A*01:01 | orf1ab polyprotein | 4198 | 4206 | 9  | KSDGTGTIY  | Consensus (ann/smm) | 0.15 |
| 1976 | HLA-A*02:01 | orf1ab polyprotein | 2363 | 2372 | 10 | WLMWLIINLV | Consensus (ann/smm) | 0.15 |
| 1977 | HLA-A*02:01 | orf1ab polyprotein | 3635 | 3644 | 10 | FLCLFLLPSL | Consensus (ann/smm) | 0.15 |
| 1978 | HLA-A*03:01 | orf1ab polyprotein | 1387 | 1396 | 10 | KLMPVCVETK | Consensus (ann/smm) | 0.15 |
| 1979 | HLA-A*11:01 | orf1ab polyprotein | 3178 | 3187 | 10 | AALCTFLLNK | Consensus (ann/smm) | 0.15 |
| 1980 | HLA-A*11:01 | orf1ab polyprotein | 4487 | 4495 | 9  | AVAKHDFFK  | Consensus (ann/smm) | 0.15 |
| 1981 | HLA-A*26:01 | orf1ab polyprotein | 1966 | 1975 | 10 | DVVAIDYKHY | Consensus (ann/smm) | 0.15 |
| 1982 | HLA-A*26:01 | orf1ab polyprotein | 2664 | 2673 | 10 | EVTGDSCNNY | Consensus (ann/smm) | 0.15 |
| 1983 | HLA-A*31:01 | orf1ab polyprotein | 3060 | 3069 | 10 | LAYYFMRFR  | Consensus (ann/smm) | 0.15 |
| 1984 | HLA-A*33:03 | orf1ab polyprotein | 542  | 550  | 9  | RVVRSIFSR  | netmhcpa_el         | 0.15 |
| 1985 | HLA-A*33:03 | orf1ab polyprotein | 2181 | 2189 | 9  | TFTRSTNSR  | netmhcpa_el         | 0.15 |
| 1986 | HLA-A*33:03 | orf1ab polyprotein | 4917 | 4925 | 9  | DALFAYTKR  | netmhcpa_el         | 0.15 |
| 1987 | HLA-A*33:03 | orf1ab polyprotein | 6206 | 6214 | 9  | AVHECFVKR  | netmhcpa_el         | 0.15 |
| 1988 | HLA-A*02:01 | orf1ab polyprotein | 3620 | 3629 | 10 | AMSAFAMMFV | Consensus (ann/smm) | 0.14 |
| 1989 | HLA-A*02:06 | orf1ab polyprotein | 5058 | 5067 | 10 | MVMCGGSLYV | Consensus (ann/smm) | 0.14 |
| 1990 | HLA-A*11:01 | orf1ab polyprotein | 1176 | 1185 | 10 | AVFDKNLYDK | Consensus (ann/smm) | 0.14 |
| 1991 | HLA-A*11:01 | orf1ab polyprotein | 4072 | 4081 | 10 | VVIPDYNTYK | Consensus (ann/smm) | 0.14 |
| 1992 | HLA-A*11:01 | orf1ab polyprotein | 4433 | 4442 | 10 | KVAGFAKFLK | Consensus (ann/smm) | 0.14 |
| 1993 | HLA-A*11:01 | orf1ab polyprotein | 829  | 837  | 9  | TVIEVQGYK  | Consensus (ann/smm) | 0.14 |
| 1994 | HLA-A*11:01 | orf1ab polyprotein | 1520 | 1529 | 10 | STQLGIEFLK | Consensus (ann/smm) | 0.14 |
| 1995 | HLA-A*11:01 | orf1ab polyprotein | 6623 | 6632 | 10 | AVKTQFNYYK | Consensus (ann/smm) | 0.14 |
| 1996 | HLA-A*11:01 | orf1ab polyprotein | 4958 | 4966 | 9  | MTNRQFHQK  | Consensus (ann/smm) | 0.14 |
| 1997 | HLA-A*24:02 | orf1ab polyprotein | 1919 | 1928 | 10 | PYPNASFDNF | Consensus (ann/smm) | 0.14 |

|      |             |                    |      |      |    |            |                     |      |
|------|-------------|--------------------|------|------|----|------------|---------------------|------|
| 1998 | HLA-A*24:02 | orf1ab polyprotein | 5080 | 5088 | 9  | AYANSVFNI  | Consensus (ann/smm) | 0.14 |
| 1999 | HLA-A*26:01 | orf1ab polyprotein | 2132 | 2141 | 10 | SVPWDTIANY | Consensus (ann/smm) | 0.14 |
| 2000 | HLA-A*33:03 | orf1ab polyprotein | 69   | 77   | 9  | VFIKRSDAR  | netmhcpa_el         | 0.14 |
| 2001 | HLA-A*33:03 | orf1ab polyprotein | 5038 | 5046 | 9  | CSLSHRFYR  | netmhcpa_el         | 0.14 |
| 2002 | HLA-A*01:01 | orf1ab polyprotein | 3241 | 3250 | 10 | FSNSGSDVLY | Consensus (ann/smm) | 0.13 |
| 2003 | HLA-A*01:01 | orf1ab polyprotein | 5381 | 5389 | 9  | VTDVTQLYL  | Consensus (ann/smm) | 0.13 |
| 2004 | HLA-A*02:01 | orf1ab polyprotein | 1248 | 1257 | 10 | FLTENLLLYI | Consensus (ann/smm) | 0.13 |
| 2005 | HLA-A*02:01 | orf1ab polyprotein | 2225 | 2234 | 10 | KLINIIWFL  | Consensus (ann/smm) | 0.13 |
| 2006 | HLA-A*02:01 | orf1ab polyprotein | 6077 | 6086 | 10 | LMYKGLPWNV | Consensus (ann/smm) | 0.13 |
| 2007 | HLA-A*02:01 | orf1ab polyprotein | 5364 | 5373 | 10 | KLVLSPNPYV | Consensus (ann/smm) | 0.13 |
| 2008 | HLA-A*02:06 | orf1ab polyprotein | 2884 | 2892 | 9  | FLPRVFSAV  | Consensus (ann/smm) | 0.13 |
| 2009 | HLA-A*02:06 | orf1ab polyprotein | 2347 | 2356 | 10 | MQLFFSYFAV | Consensus (ann/smm) | 0.13 |
| 2010 | HLA-A*02:06 | orf1ab polyprotein | 4241 | 4250 | 10 | MVLGSLAATV | Consensus (ann/smm) | 0.13 |
| 2011 | HLA-A*03:01 | orf1ab polyprotein | 3711 | 3720 | 10 | LMNVLTLYYK | Consensus (ann/smm) | 0.13 |
| 2012 | HLA-A*03:01 | orf1ab polyprotein | 4030 | 4039 | 10 | QTMLFTMLRK | Consensus (ann/smm) | 0.13 |
| 2013 | HLA-A*03:01 | orf1ab polyprotein | 807  | 816  | 10 | MVTNNTFTLK | Consensus (ann/smm) | 0.13 |
| 2014 | HLA-A*03:01 | orf1ab polyprotein | 3178 | 3187 | 10 | AALCTFLNKK | Consensus (ann/smm) | 0.13 |
| 2015 | HLA-A*11:01 | orf1ab polyprotein | 483  | 492  | 10 | STSAFVETVK | Consensus (ann/smm) | 0.13 |
| 2016 | HLA-A*24:02 | orf1ab polyprotein | 2002 | 2010 | 9  | TYKPNTWCI  | Consensus (ann/smm) | 0.13 |
| 2017 | HLA-A*24:02 | orf1ab polyprotein | 3606 | 3614 | 9  | LYENAFLPF  | Consensus (ann/smm) | 0.13 |
| 2018 | HLA-A*24:02 | orf1ab polyprotein | 2593 | 2602 | 10 | AYVNTFSSTF | Consensus (ann/smm) | 0.13 |
| 2019 | HLA-A*24:02 | orf1ab polyprotein | 3388 | 3397 | 10 | VYQCAMRPNF | Consensus (ann/smm) | 0.13 |
| 2020 | HLA-A*24:02 | orf1ab polyprotein | 7019 | 7028 | 10 | GYVMHANYIF | Consensus (ann/smm) | 0.13 |
| 2021 | HLA-A*24:02 | orf1ab polyprotein | 4460 | 4469 | 10 | SYFVVKRHTF | Consensus (ann/smm) | 0.13 |
| 2022 | HLA-A*26:01 | orf1ab polyprotein | 2468 | 2477 | 10 | EVARDLSLQF | Consensus (ann/smm) | 0.13 |
| 2023 | HLA-A*26:01 | orf1ab polyprotein | 4866 | 4875 | 10 | EVVDKYFDCY | Consensus (ann/smm) | 0.13 |
| 2024 | HLA-A*26:01 | orf1ab polyprotein | 6565 | 6574 | 10 | ETICAPLTVF | Consensus (ann/smm) | 0.13 |
| 2025 | HLA-A*26:01 | orf1ab polyprotein | 5058 | 5066 | 9  | MVMCGGSLY  | Consensus (ann/smm) | 0.13 |
| 2026 | HLA-A*31:01 | orf1ab polyprotein | 5502 | 5510 | 9  | RNYVFTGYR  | Consensus (ann/smm) | 0.13 |

|      |             |                    |      |      |    |             |                     |      |
|------|-------------|--------------------|------|------|----|-------------|---------------------|------|
| 2027 | HLA-A*31:01 | orf1ab polyprotein | 3061 | 3068 | 8  | AYYFMRFR    | ann                 | 0.13 |
| 2028 | HLA-A*33:03 | orf1ab polyprotein | 2810 | 2818 | 9  | KAIDGGVTR   | netmhcpa_el         | 0.13 |
| 2029 | HLA-A*33:03 | orf1ab polyprotein | 3061 | 3069 | 9  | AYYFMRFR    | netmhcpa_el         | 0.13 |
| 2030 | HLA-A*01:01 | orf1ab polyprotein | 4842 | 4850 | 9  | ISDYDYRY    | Consensus (ann/smm) | 0.12 |
| 2031 | HLA-A*01:01 | orf1ab polyprotein | 5299 | 5307 | 9  | LTNDNTRY    | Consensus (ann/smm) | 0.12 |
| 2032 | HLA-A*01:01 | orf1ab polyprotein | 1637 | 1646 | 10 | TTDPSFLGRY  | Consensus (ann/smm) | 0.12 |
| 2033 | HLA-A*01:01 | orf1ab polyprotein | 2889 | 2897 | 9  | FSAVGNICY   | Consensus (ann/smm) | 0.12 |
| 2034 | HLA-A*02:01 | orf1ab polyprotein | 2384 | 2393 | 10 | YIFFASFYYV  | Consensus (ann/smm) | 0.12 |
| 2035 | HLA-A*02:01 | orf1ab polyprotein | 3085 | 3094 | 10 | FLMSFTVLCL  | Consensus (ann/smm) | 0.12 |
| 2036 | HLA-A*02:06 | orf1ab polyprotein | 2332 | 2340 | 9  | ILFTRFFVY   | Consensus (ann/smm) | 0.12 |
| 2037 | HLA-A*02:06 | orf1ab polyprotein | 3598 | 3606 | 9  | TQWSLFFFL   | Consensus (ann/smm) | 0.12 |
| 2038 | HLA-A*02:06 | orf1ab polyprotein | 4089 | 4098 | 10 | FTYASALWEI  | Consensus (ann/smm) | 0.12 |
| 2039 | HLA-A*03:01 | orf1ab polyprotein | 5274 | 5282 | 9  | HLYLQYIRK   | Consensus (ann/smm) | 0.12 |
| 2040 | HLA-A*03:01 | orf1ab polyprotein | 4433 | 4442 | 10 | KVAGFAKFLK  | Consensus (ann/smm) | 0.12 |
| 2041 | HLA-A*03:01 | orf1ab polyprotein | 5024 | 5033 | 10 | IMASLVLARK  | Consensus (ann/smm) | 0.12 |
| 2042 | HLA-A*11:01 | orf1ab polyprotein | 4030 | 4039 | 10 | QTMLFTMLRK  | Consensus (ann/smm) | 0.12 |
| 2043 | HLA-A*11:01 | orf1ab polyprotein | 4716 | 4724 | 9  | TSFGPLVRK   | Consensus (ann/smm) | 0.12 |
| 2044 | HLA-A*11:01 | orf1ab polyprotein | 6806 | 6814 | 9  | GVAMPNLYK   | Consensus (ann/smm) | 0.12 |
| 2045 | HLA-A*11:01 | orf1ab polyprotein | 2600 | 2610 | 11 | STFNVPMEKLN | Consensus (ann/smm) | 0.12 |
| 2046 | HLA-A*24:02 | orf1ab polyprotein | 4090 | 4098 | 9  | TYASALWEI   | Consensus (ann/smm) | 0.12 |
| 2047 | HLA-A*24:02 | orf1ab polyprotein | 1535 | 1544 | 10 | VYYTSNPTTF  | Consensus (ann/smm) | 0.12 |
| 2048 | HLA-A*24:02 | orf1ab polyprotein | 3062 | 3071 | 10 | YYFMRFRRAF  | Consensus (ann/smm) | 0.12 |
| 2049 | HLA-A*26:01 | orf1ab polyprotein | 472  | 480  | 9  | EIAILASF    | Consensus (ann/smm) | 0.12 |
| 2050 | HLA-A*26:01 | orf1ab polyprotein | 828  | 836  | 9  | DTVIEVQGY   | Consensus (ann/smm) | 0.12 |
| 2051 | HLA-A*26:01 | orf1ab polyprotein | 2323 | 2331 | 9  | LVAEWFLAY   | Consensus (ann/smm) | 0.12 |
| 2052 | HLA-A*26:01 | orf1ab polyprotein | 3106 | 3115 | 10 | SVIYLYLTFY  | Consensus (ann/smm) | 0.12 |
| 2053 | HLA-A*26:01 | orf1ab polyprotein | 1727 | 1735 | 9  | DVRETMSYL   | Consensus (ann/smm) | 0.12 |
| 2054 | HLA-A*31:01 | orf1ab polyprotein | 5039 | 5046 | 8  | SLSHRFYR    | ann                 | 0.12 |
| 2055 | HLA-A*33:03 | orf1ab polyprotein | 91   | 99   | 9  | ELEGIQYGR   | netmhcpa_el         | 0.12 |

|      |             |                    |      |      |    |            |                     |      |
|------|-------------|--------------------|------|------|----|------------|---------------------|------|
| 2056 | HLA-A*33:03 | orf1ab polyprotein | 4516 | 4524 | 9  | MADLVYALR  | netmhcpa_el         | 0.12 |
| 2057 | HLA-A*33:03 | orf1ab polyprotein | 5759 | 5767 | 9  | DMFLGTCRR  | netmhcpa_el         | 0.12 |
| 2058 | HLA-A*33:03 | orf1ab polyprotein | 3218 | 3227 | 10 | SGAMDTTSYR | netmhcpa_el         | 0.12 |
| 2059 | HLA-A*01:01 | orf1ab polyprotein | 1321 | 1329 | 9  | PTDNYITTY  | Consensus (ann/smm) | 0.11 |
| 2060 | HLA-A*01:01 | orf1ab polyprotein | 3437 | 3445 | 9  | GTDLEGNFY  | Consensus (ann/smm) | 0.11 |
| 2061 | HLA-A*01:01 | orf1ab polyprotein | 5130 | 5138 | 9  | DTDFVNEFY  | Consensus (ann/smm) | 0.11 |
| 2062 | HLA-A*02:01 | orf1ab polyprotein | 2331 | 2340 | 10 | YILFTRFFYV | Consensus (ann/smm) | 0.11 |
| 2063 | HLA-A*02:06 | orf1ab polyprotein | 3089 | 3097 | 9  | FTVLCLTPV  | Consensus (ann/smm) | 0.11 |
| 2064 | HLA-A*02:06 | orf1ab polyprotein | 6032 | 6040 | 9  | LQLGFSTGV  | Consensus (ann/smm) | 0.11 |
| 2065 | HLA-A*03:01 | orf1ab polyprotein | 4031 | 4039 | 9  | TMLFTMLRK  | Consensus (ann/smm) | 0.11 |
| 2066 | HLA-A*03:01 | orf1ab polyprotein | 4905 | 4913 | 9  | RLYYDSMSY  | Consensus (ann/smm) | 0.11 |
| 2067 | HLA-A*03:01 | orf1ab polyprotein | 5392 | 5400 | 9  | MSYYCKSHK  | Consensus (ann/smm) | 0.11 |
| 2068 | HLA-A*03:01 | orf1ab polyprotein | 5455 | 5463 | 9  | KLFAAETLK  | Consensus (ann/smm) | 0.11 |
| 2069 | HLA-A*03:01 | orf1ab polyprotein | 5978 | 5986 | 9  | RLISMMGFK  | Consensus (ann/smm) | 0.11 |
| 2070 | HLA-A*03:01 | orf1ab polyprotein | 1851 | 1860 | 10 | ALLTKSSEYK | Consensus (ann/smm) | 0.11 |
| 2071 | HLA-A*03:01 | orf1ab polyprotein | 3621 | 3630 | 10 | MSAFAMMFVK | Consensus (ann/smm) | 0.11 |
| 2072 | HLA-A*03:01 | orf1ab polyprotein | 5533 | 5542 | 10 | VVYRGTTYK  | Consensus (ann/smm) | 0.11 |
| 2073 | HLA-A*11:01 | orf1ab polyprotein | 2599 | 2608 | 10 | SSTFNVPMEK | Consensus (ann/smm) | 0.11 |
| 2074 | HLA-A*11:01 | orf1ab polyprotein | 3621 | 3630 | 10 | MSAFAMMFVK | Consensus (ann/smm) | 0.11 |
| 2075 | HLA-A*11:01 | orf1ab polyprotein | 5792 | 5801 | 10 | SAQCFKMFYK | Consensus (ann/smm) | 0.11 |
| 2076 | HLA-A*11:01 | orf1ab polyprotein | 6428 | 6437 | 10 | SAGFSLWVYK | Consensus (ann/smm) | 0.11 |
| 2077 | HLA-A*11:01 | orf1ab polyprotein | 7038 | 7047 | 10 | SSYSLFDMSK | Consensus (ann/smm) | 0.11 |
| 2078 | HLA-A*11:01 | orf1ab polyprotein | 808  | 816  | 9  | VTNNTFTLK  | Consensus (ann/smm) | 0.11 |
| 2079 | HLA-A*11:01 | orf1ab polyprotein | 1875 | 1883 | 9  | TTIKPVTYK  | Consensus (ann/smm) | 0.11 |
| 2080 | HLA-A*11:01 | orf1ab polyprotein | 2192 | 2200 | 9  | ASMPPTIAK  | Consensus (ann/smm) | 0.11 |
| 2081 | HLA-A*11:01 | orf1ab polyprotein | 3622 | 3630 | 9  | SAFAMMFVK  | Consensus (ann/smm) | 0.11 |
| 2082 | HLA-A*11:01 | orf1ab polyprotein | 4892 | 4900 | 9  | KSAGFPFNK  | Consensus (ann/smm) | 0.11 |
| 2083 | HLA-A*11:01 | orf1ab polyprotein | 5793 | 5801 | 9  | AQCFKMFYK  | Consensus (ann/smm) | 0.11 |
| 2084 | HLA-A*24:02 | orf1ab polyprotein | 1536 | 1544 | 9  | YYTSNPPTF  | Consensus (ann/smm) | 0.11 |

|      |             |                    |      |      |    |            |                     |      |
|------|-------------|--------------------|------|------|----|------------|---------------------|------|
| 2085 | HLA-A*24:02 | orf1ab polyprotein | 3653 | 3661 | 9  | VYMPASWVM  | Consensus (ann/smm) | 0.11 |
| 2086 | HLA-A*24:02 | orf1ab polyprotein | 6148 | 6156 | 9  | TYACWHHSI  | Consensus (ann/smm) | 0.11 |
| 2087 | HLA-A*24:02 | orf1ab polyprotein | 899  | 908  | 10 | EWSMATYYLF | Consensus (ann/smm) | 0.11 |
| 2088 | HLA-A*24:02 | orf1ab polyprotein | 2167 | 2176 | 10 | NYMPYFFTL  | Consensus (ann/smm) | 0.11 |
| 2089 | HLA-A*26:01 | orf1ab polyprotein | 4863 | 4871 | 9  | FVVEVVDKY  | Consensus (ann/smm) | 0.11 |
| 2090 | HLA-A*26:01 | orf1ab polyprotein | 5380 | 5388 | 9  | DVTDVTQLY  | Consensus (ann/smm) | 0.11 |
| 2091 | HLA-A*31:01 | orf1ab polyprotein | 3061 | 3069 | 9  | AYYFMRFR   | Consensus (ann/smm) | 0.11 |
| 2092 | HLA-A*33:03 | orf1ab polyprotein | 2833 | 2841 | 9  | DFDTWFSQR  | netmhcpa_el         | 0.11 |
| 2093 | HLA-A*33:03 | orf1ab polyprotein | 4967 | 4975 | 9  | LLKSIAATR  | netmhcpa_el         | 0.11 |
| 2094 | HLA-A*33:03 | orf1ab polyprotein | 4515 | 4524 | 10 | TMADLVYALR | netmhcpa_el         | 0.11 |
| 2095 | HLA-A*03:01 | orf1ab polyprotein | 2382 | 2391 | 10 | RMYYFFASFY | Consensus (ann/smm) | 0.1  |
| 2096 | HLA-A*24:02 | orf1ab polyprotein | 2167 | 2175 | 9  | NYMPYFFTL  | Consensus (ann/smm) | 0.1  |
| 2097 | HLA-A*26:01 | orf1ab polyprotein | 1503 | 1511 | 9  | ETISLAGSY  | Consensus (ann/smm) | 0.1  |
| 2098 | HLA-A*33:03 | orf1ab polyprotein | 279  | 287  | 9  | SIIKTIQPR  | netmhcpa_el         | 0.1  |
| 2099 | HLA-A*33:03 | orf1ab polyprotein | 2966 | 2974 | 9  | NTYLEGSVR  | netmhcpa_el         | 0.1  |
| 2100 | HLA-A*33:03 | orf1ab polyprotein | 6582 | 6590 | 9  | QVDLFRNAR  | netmhcpa_el         | 0.1  |
| 2101 | HLA-A*33:03 | orf1ab polyprotein | 2424 | 2432 | 9  | TTIVNGVRR  | netmhcpa_el         | 0.09 |
| 2102 | HLA-A*33:03 | orf1ab polyprotein | 5471 | 5479 | 9  | LSYGIATVR  | netmhcpa_el         | 0.09 |
| 2103 | HLA-A*33:03 | orf1ab polyprotein | 6668 | 6676 | 9  | LAMDEFIER  | netmhcpa_el         | 0.09 |
| 2104 | HLA-A*33:03 | orf1ab polyprotein | 3990 | 3999 | 10 | EFDRDAAMQR | netmhcpa_el         | 0.09 |
| 2105 | HLA-A*33:03 | orf1ab polyprotein | 116  | 124  | 9  | VAYRKVLLR  | netmhcpa_el         | 0.08 |
| 2106 | HLA-A*33:03 | orf1ab polyprotein | 1217 | 1225 | 9  | ESKPSVEQR  | netmhcpa_el         | 0.08 |
| 2107 | HLA-A*33:03 | orf1ab polyprotein | 2151 | 2159 | 9  | STTTNIVTR  | netmhcpa_el         | 0.08 |
| 2108 | HLA-A*33:03 | orf1ab polyprotein | 2463 | 2471 | 9  | TFISDEVAR  | netmhcpa_el         | 0.08 |
| 2109 | HLA-A*33:03 | orf1ab polyprotein | 3155 | 3163 | 9  | WFFSNYLKR  | netmhcpa_el         | 0.08 |
| 2110 | HLA-A*33:03 | orf1ab polyprotein | 6505 | 6513 | 9  | VAFELWAKR  | netmhcpa_el         | 0.08 |
| 2111 | HLA-A*02:06 | orf1ab polyprotein | 2384 | 2393 | 10 | YIFFASFYV  | Consensus (ann/smm) | 0.07 |
| 2112 | HLA-A*02:06 | orf1ab polyprotein | 2331 | 2340 | 10 | YILFTRFFV  | Consensus (ann/smm) | 0.07 |
| 2113 | HLA-A*26:01 | orf1ab polyprotein | 2585 | 2594 | 10 | EVAVKMFDAY | Consensus (ann/smm) | 0.07 |

|      |             |                    |      |      |    |            |                     |      |
|------|-------------|--------------------|------|------|----|------------|---------------------|------|
| 2114 | HLA-A*33:03 | orf1ab polyprotein | 1555 | 1563 | 9  | NLKTLLSLR  | netmhcpa_el         | 0.07 |
| 2115 | HLA-A*33:03 | orf1ab polyprotein | 2520 | 2528 | 9  | HFVNLDNLR  | netmhcpa_el         | 0.07 |
| 2116 | HLA-A*33:03 | orf1ab polyprotein | 3553 | 3561 | 9  | EFTPFDVVR  | netmhcpa_el         | 0.07 |
| 2117 | HLA-A*33:03 | orf1ab polyprotein | 3566 | 3574 | 9  | VTFQSAVKR  | netmhcpa_el         | 0.07 |
| 2118 | HLA-A*33:03 | orf1ab polyprotein | 4502 | 4510 | 9  | MVPHISRQR  | netmhcpa_el         | 0.07 |
| 2119 | HLA-A*33:03 | orf1ab polyprotein | 4841 | 4849 | 9  | AISDYDYR   | netmhcpa_el         | 0.07 |
| 2120 | HLA-A*33:03 | orf1ab polyprotein | 6534 | 6542 | 9  | NTVIWDYKR  | netmhcpa_el         | 0.07 |
| 2121 | HLA-A*33:03 | orf1ab polyprotein | 110  | 119  | 10 | HVGEIPVAYR | netmhcpa_el         | 0.07 |
| 2122 | HLA-A*01:01 | orf1ab polyprotein | 4163 | 4171 | 9  | CTDDNALAY  | Consensus (ann/smm) | 0.06 |
| 2123 | HLA-A*01:01 | orf1ab polyprotein | 4163 | 4172 | 10 | CTDDNALAYY | Consensus (ann/smm) | 0.06 |
| 2124 | HLA-A*02:01 | orf1ab polyprotein | 2780 | 2789 | 10 | FLFVAIFYL  | Consensus (ann/smm) | 0.06 |
| 2125 | HLA-A*02:06 | orf1ab polyprotein | 3639 | 3647 | 9  | FLLPSLATV  | Consensus (ann/smm) | 0.06 |
| 2126 | HLA-A*11:01 | orf1ab polyprotein | 2600 | 2608 | 9  | STFNVPMEK  | Consensus (ann/smm) | 0.06 |
| 2127 | HLA-A*11:01 | orf1ab polyprotein | 6477 | 6486 | 10 | SIINNTVYTK | Consensus (ann/smm) | 0.06 |
| 2128 | HLA-A*26:01 | orf1ab polyprotein | 2305 | 2314 | 10 | ETIQITISSF | Consensus (ann/smm) | 0.06 |
| 2129 | HLA-A*31:01 | orf1ab polyprotein | 5038 | 5046 | 9  | CSLSHRFYR  | Consensus (ann/smm) | 0.06 |
| 2130 | HLA-A*33:03 | orf1ab polyprotein | 534  | 542  | 9  | YAFASEAAR  | netmhcpa_el         | 0.06 |
| 2131 | HLA-A*33:03 | orf1ab polyprotein | 2977 | 2985 | 9  | TTFDSEYCR  | netmhcpa_el         | 0.06 |
| 2132 | HLA-A*33:03 | orf1ab polyprotein | 3004 | 3012 | 9  | WVLNNDYYR  | netmhcpa_el         | 0.06 |
| 2133 | HLA-A*33:03 | orf1ab polyprotein | 4009 | 4017 | 9  | MTQMYKQAR  | netmhcpa_el         | 0.06 |
| 2134 | HLA-A*33:03 | orf1ab polyprotein | 4030 | 4038 | 9  | QTMLFTMLR  | netmhcpa_el         | 0.06 |
| 2135 | HLA-A*33:03 | orf1ab polyprotein | 4810 | 4818 | 9  | DFYDFAVSK  | netmhcpa_el         | 0.06 |
| 2136 | HLA-A*33:03 | orf1ab polyprotein | 5477 | 5485 | 9  | TVREVLSDR  | netmhcpa_el         | 0.06 |
| 2137 | HLA-A*33:03 | orf1ab polyprotein | 5528 | 5536 | 9  | DYGDVVYR   | netmhcpa_el         | 0.06 |
| 2138 | HLA-A*33:03 | orf1ab polyprotein | 3219 | 3227 | 9  | GAMDTTSYR  | netmhcpa_el         | 0.05 |
| 2139 | HLA-A*33:03 | orf1ab polyprotein | 4187 | 4195 | 9  | DLQDLKWAR  | netmhcpa_el         | 0.05 |
| 2140 | HLA-A*33:03 | orf1ab polyprotein | 7045 | 7053 | 9  | MSKFPLKLR  | netmhcpa_el         | 0.05 |
| 2141 | HLA-A*33:03 | orf1ab polyprotein | 176  | 184  | 9  | ELNGGAYTR  | netmhcpa_el         | 0.04 |
| 2142 | HLA-A*33:03 | orf1ab polyprotein | 710  | 718  | 9  | VTHSKGLYR  | netmhcpa_el         | 0.04 |

|      |             |                    |      |      |    |             |                                        |      |
|------|-------------|--------------------|------|------|----|-------------|----------------------------------------|------|
| 2143 | HLA-A*33:03 | orf1ab polyprotein | 3699 | 3707 | 9  | TVYDDGARR   | netmhcpa_el                            | 0.04 |
| 2144 | HLA-A*33:03 | orf1ab polyprotein | 6122 | 6130 | 9  | YFVKIGPER   | netmhcpa_el                            | 0.04 |
| 2145 | HLA-A*33:03 | orf1ab polyprotein | 4733 | 4741 | 9  | VVSTGYHFR   | netmhcpa_el                            | 0.02 |
| 2146 | HLA-A*33:03 | orf1ab polyprotein | 3443 | 3451 | 9  | NFYGPFVDR   | netmhcpa_el                            | 0.01 |
| 2147 | HLA-A*01:01 | ORF3a protein      | 202  | 211  | 10 | VLHSYFTSDY  | Consensus (ann/smm)                    | 1    |
| 2148 | HLA-A*01:01 | ORF3a protein      | 189  | 197  | 9  | YTEKWESGV   | Consensus (ann/smm)                    | 1    |
| 2149 | HLA-A*03:01 | ORF3a protein      | 51   | 61   | 11 | ALLAVFQSASK | Consensus (ann/smm)                    | 1    |
| 2150 | HLA-A*01:01 | ORF3a protein      | 220  | 228  | 9  | STDTGVEHV   | Consensus (ann/smm)                    | 0.98 |
| 2151 | HLA-A*24:02 | ORF3a protein      | 112  | 121  | 10 | VYFLQSINFV  | Consensus (ann/smm)                    | 0.98 |
| 2152 | HLA-A*02:01 | ORF3a protein      | 107  | 116  | 10 | YLYALVYFLQ  | Consensus (ann/smm)                    | 0.97 |
| 2153 | HLA-A*02:06 | ORF3a protein      | 113  | 121  | 9  | YFLQSINFV   | Consensus (ann/smm)                    | 0.97 |
| 2154 | HLA-A*24:02 | ORF3a protein      | 211  | 220  | 10 | YYQLYSTQLS  | Consensus (ann/smm)                    | 0.97 |
| 2155 | HLA-A*03:01 | ORF3a protein      | 59   | 67   | 9  | ASKIITLKK   | Consensus (ann/smm)                    | 0.92 |
| 2156 | HLA-A*03:01 | ORF3a protein      | 58   | 66   | 9  | SASKIITLK   | Consensus (ann/smm)                    | 0.91 |
| 2157 | HLA-A*01:01 | ORF3a protein      | 146  | 156  | 11 | FLCWHTNCYDY | Consensus (ann/smm)                    | 0.9  |
| 2158 | HLA-A*02:01 | ORF3a protein      | 138  | 147  | 10 | PLLYDANYFL  | Consensus (ann/smm)                    | 0.9  |
| 2159 | HLA-A*02:06 | ORF3a protein      | 56   | 65   | 10 | FQSASKIITL  | Consensus (ann/smm)                    | 0.89 |
| 2160 | HLA-A*03:01 | ORF3a protein      | 126  | 136  | 11 | RLWLCWKCRSK | Consensus (ann/smm)                    | 0.89 |
| 2161 | HLA-A*02:06 | ORF3a protein      | 109  | 118  | 10 | YALVYFLQSI  | Consensus (ann/smm)                    | 0.88 |
| 2162 | HLA-A*24:02 | ORF3a protein      | 206  | 214  | 9  | YFTSDYYQL   | Consensus (ann/smm)                    | 0.85 |
| 2163 | HLA-A*01:01 | ORF3a protein      | 208  | 217  | 10 | TSDYYQLYST  | Consensus (ann/smm)                    | 0.81 |
| 2164 | HLA-A*11:01 | ORF3a protein      | 57   | 66   | 10 | QSASKIITLK  | Consensus (ann/smm)                    | 0.81 |
| 2165 | HLA-A*02:01 | ORF3a protein      | 82   | 90   | 9  | NLLLLFVTV   | Consensus (ann/comblib_sidney2008/smm) | 0.79 |
| 2166 | HLA-A*01:01 | ORF3a protein      | 205  | 215  | 11 | SYFTSDYYQLY | Consensus (ann/smm)                    | 0.78 |
| 2167 | HLA-A*31:01 | ORF3a protein      | 113  | 122  | 10 | YFLQSINFVR  | Consensus (ann/smm)                    | 0.78 |
| 2168 | HLA-A*33:03 | ORF3a protein      | 58   | 66   | 9  | SASKIITLK   | netmhcpa_el                            | 0.77 |
| 2169 | HLA-A*33:03 | ORF3a protein      | 183  | 192  | 10 | DYQIGGYTEK  | netmhcpa_el                            | 0.75 |
| 2170 | HLA-A*24:02 | ORF3a protein      | 140  | 148  | 9  | LYDANYFLC   | Consensus (ann/smm)                    | 0.74 |
| 2171 | HLA-A*31:01 | ORF3a protein      | 125  | 134  | 10 | MRLWLCWKCR  | Consensus (ann/smm)                    | 0.74 |

|      |             |               |     |     |    |             |                                        |      |
|------|-------------|---------------|-----|-----|----|-------------|----------------------------------------|------|
| 2172 | HLA-A*11:01 | ORF3a protein | 6   | 16  | 11 | RIFTIGVTLK  | Consensus (ann/smm)                    | 0.71 |
| 2173 | HLA-A*31:01 | ORF3a protein | 118 | 126 | 9  | INFVRIIMR   | Consensus (ann/smm)                    | 0.71 |
| 2174 | HLA-A*02:01 | ORF3a protein | 45  | 53  | 9  | WLIVGVALL   | Consensus (ann/comblib_sidney2008/smm) | 0.7  |
| 2175 | HLA-A*03:01 | ORF3a protein | 105 | 113 | 9  | FLYLYALVY   | Consensus (ann/smm)                    | 0.7  |
| 2176 | HLA-A*31:01 | ORF3a protein | 117 | 126 | 10 | SINFVRIIMR  | Consensus (ann/smm)                    | 0.7  |
| 2177 | HLA-A*02:06 | ORF3a protein | 72  | 80  | 9  | ALSKGVHFV   | Consensus (ann/smm)                    | 0.68 |
| 2178 | HLA-A*24:02 | ORF3a protein | 159 | 167 | 9  | PYNSVTSSI   | Consensus (ann/smm)                    | 0.67 |
| 2179 | HLA-A*24:02 | ORF3a protein | 37  | 45  | 9  | IQASLPFGW   | Consensus (ann/smm)                    | 0.65 |
| 2180 | HLA-A*02:01 | ORF3a protein | 4   | 13  | 10 | FMRIFTIGTV  | Consensus (ann/smm)                    | 0.61 |
| 2181 | HLA-A*26:01 | ORF3a protein | 206 | 215 | 10 | YFTSDYYQLY  | Consensus (ann/smm)                    | 0.61 |
| 2182 | HLA-A*33:03 | ORF3a protein | 22  | 30  | 9  | DATPSDFVR   | netmhcpa_el                            | 0.61 |
| 2183 | HLA-A*03:01 | ORF3a protein | 227 | 235 | 9  | HVTFFIYNK   | Consensus (ann/smm)                    | 0.6  |
| 2184 | HLA-A*24:02 | ORF3a protein | 123 | 131 | 9  | IIMRLWLCW   | Consensus (ann/smm)                    | 0.6  |
| 2185 | HLA-A*24:02 | ORF3a protein | 108 | 116 | 9  | LYALVYFLQ   | Consensus (ann/smm)                    | 0.59 |
| 2186 | HLA-A*31:01 | ORF3a protein | 114 | 122 | 9  | FLQSINFVR   | Consensus (ann/smm)                    | 0.59 |
| 2187 | HLA-A*02:06 | ORF3a protein | 51  | 59  | 9  | ALLAVFQSA   | Consensus (ann/smm)                    | 0.57 |
| 2188 | HLA-A*24:02 | ORF3a protein | 105 | 114 | 10 | FLYLYALVYF  | Consensus (ann/smm)                    | 0.56 |
| 2189 | HLA-A*24:02 | ORF3a protein | 210 | 219 | 10 | DYYQLYSTQL  | Consensus (ann/smm)                    | 0.51 |
| 2190 | HLA-A*02:06 | ORF3a protein | 139 | 147 | 9  | LLYDANYFL   | Consensus (ann/smm)                    | 0.5  |
| 2191 | HLA-A*02:06 | ORF3a protein | 82  | 90  | 9  | NLLLLFVTV   | Consensus (ann/smm)                    | 0.49 |
| 2192 | HLA-A*01:01 | ORF3a protein | 145 | 154 | 10 | YFLCWHTNCY  | Consensus (ann/smm)                    | 0.48 |
| 2193 | HLA-A*11:01 | ORF3a protein | 59  | 67  | 9  | ASKIITLKK   | Consensus (ann/smm)                    | 0.46 |
| 2194 | HLA-A*01:01 | ORF3a protein | 105 | 113 | 9  | FLYLYALVY   | Consensus (ann/smm)                    | 0.45 |
| 2195 | HLA-A*01:01 | ORF3a protein | 202 | 212 | 11 | VLHSYFTSDYY | Consensus (ann/smm)                    | 0.45 |
| 2196 | HLA-A*33:03 | ORF3a protein | 8   | 16  | 9  | FTIGVTLK    | netmhcpa_el                            | 0.45 |
| 2197 | HLA-A*33:03 | ORF3a protein | 227 | 235 | 9  | HVTFFIYNK   | netmhcpa_el                            | 0.45 |
| 2198 | HLA-A*02:06 | ORF3a protein | 89  | 97  | 9  | TVYSHLLL    | Consensus (ann/smm)                    | 0.44 |
| 2199 | HLA-A*01:01 | ORF3a protein | 100 | 109 | 10 | GLEAPFLYLY  | Consensus (ann/smm)                    | 0.43 |
| 2200 | HLA-A*01:01 | ORF3a protein | 146 | 154 | 9  | FLCWHTNCY   | Consensus (ann/smm)                    | 0.42 |

|      |             |               |     |     |    |             |                                        |      |
|------|-------------|---------------|-----|-----|----|-------------|----------------------------------------|------|
| 2201 | HLA-A*02:01 | ORF3a protein | 79  | 88  | 10 | FVCNLLLLFV  | Consensus (ann/smm)                    | 0.42 |
| 2202 | HLA-A*26:01 | ORF3a protein | 222 | 231 | 10 | DTGVEHVTFE  | Consensus (ann/smm)                    | 0.41 |
| 2203 | HLA-A*31:01 | ORF3a protein | 124 | 134 | 11 | IMRLWLCWKCR | Consensus (ann/smm)                    | 0.41 |
| 2204 | HLA-A*02:01 | ORF3a protein | 72  | 80  | 9  | ALSKGVHFV   | Consensus (ann/comblib_sidney2008/smm) | 0.4  |
| 2205 | HLA-A*33:03 | ORF3a protein | 119 | 126 | 8  | NFVRIIMR    | netmhcpa_el                            | 0.4  |
| 2206 | HLA-A*33:03 | ORF3a protein | 117 | 126 | 10 | SINFVRIIMR  | netmhcpa_el                            | 0.4  |
| 2207 | HLA-A*02:06 | ORF3a protein | 217 | 225 | 9  | TQLSTDTGV   | Consensus (ann/smm)                    | 0.39 |
| 2208 | HLA-A*02:06 | ORF3a protein | 107 | 115 | 9  | YLYALVYFL   | Consensus (ann/smm)                    | 0.37 |
| 2209 | HLA-A*11:01 | ORF3a protein | 8   | 16  | 9  | FTIGTVTLK   | Consensus (ann/smm)                    | 0.37 |
| 2210 | HLA-A*11:01 | ORF3a protein | 123 | 132 | 10 | IIMRLWLCWK  | Consensus (ann/smm)                    | 0.36 |
| 2211 | HLA-A*26:01 | ORF3a protein | 79  | 87  | 9  | FVCNLLLLF   | Consensus (ann/smm)                    | 0.36 |
| 2212 | HLA-A*11:01 | ORF3a protein | 58  | 67  | 10 | SASKIITLKK  | Consensus (ann/smm)                    | 0.35 |
| 2213 | HLA-A*24:02 | ORF3a protein | 106 | 115 | 10 | LYLYALVYFL  | Consensus (ann/smm)                    | 0.35 |
| 2214 | HLA-A*03:01 | ORF3a protein | 124 | 132 | 9  | IMRLWLCWK   | Consensus (ann/smm)                    | 0.34 |
| 2215 | HLA-A*33:03 | ORF3a protein | 118 | 126 | 9  | INFVRIIMR   | netmhcpa_el                            | 0.34 |
| 2216 | HLA-A*01:01 | ORF3a protein | 208 | 216 | 9  | TSDYQQLYS   | Consensus (ann/smm)                    | 0.33 |
| 2217 | HLA-A*11:01 | ORF3a protein | 58  | 66  | 9  | SASKIITLK   | Consensus (ann/smm)                    | 0.3  |
| 2218 | HLA-A*31:01 | ORF3a protein | 126 | 134 | 9  | RLWLCWKCR   | Consensus (ann/smm)                    | 0.3  |
| 2219 | HLA-A*24:02 | ORF3a protein | 211 | 219 | 9  | YYQLYSTQL   | Consensus (ann/smm)                    | 0.29 |
| 2220 | HLA-A*03:01 | ORF3a protein | 52  | 61  | 10 | LLAVFQSASK  | Consensus (ann/smm)                    | 0.28 |
| 2221 | HLA-A*26:01 | ORF3a protein | 19  | 28  | 10 | EIKDATPSDF  | Consensus (ann/smm)                    | 0.28 |
| 2222 | HLA-A*02:06 | ORF3a protein | 69  | 77  | 9  | WQLALSKGV   | Consensus (ann/smm)                    | 0.26 |
| 2223 | HLA-A*11:01 | ORF3a protein | 227 | 235 | 9  | HVTFFIYNK   | Consensus (ann/smm)                    | 0.24 |
| 2224 | HLA-A*24:02 | ORF3a protein | 140 | 149 | 10 | LYDANYFLCW  | Consensus (ann/smm)                    | 0.24 |
| 2225 | HLA-A*01:01 | ORF3a protein | 203 | 212 | 10 | LHSYFTSDYY  | Consensus (ann/smm)                    | 0.23 |
| 2226 | HLA-A*01:01 | ORF3a protein | 204 | 212 | 9  | HSYFTSDYY   | Consensus (ann/smm)                    | 0.23 |
| 2227 | HLA-A*24:02 | ORF3a protein | 112 | 120 | 9  | VYFLQSINF   | Consensus (ann/smm)                    | 0.23 |
| 2228 | HLA-A*26:01 | ORF3a protein | 247 | 255 | 9  | HTIDGSSGV   | Consensus (ann/smm)                    | 0.23 |
| 2229 | HLA-A*01:01 | ORF3a protein | 175 | 184 | 10 | TTPISEHDY   | Consensus (ann/smm)                    | 0.22 |

|      |             |               |     |     |    |            |                                        |      |
|------|-------------|---------------|-----|-----|----|------------|----------------------------------------|------|
| 2230 | HLA-A*02:06 | ORF3a protein | 79  | 88  | 10 | FVCNLLLLFV | Consensus (ann/smm)                    | 0.21 |
| 2231 | HLA-A*02:01 | ORF3a protein | 139 | 147 | 9  | LLYDANYFL  | Consensus (ann/comblib_sidney2008/smm) | 0.2  |
| 2232 | HLA-A*02:06 | ORF3a protein | 46  | 55  | 10 | LIVGVALLAV | Consensus (ann/smm)                    | 0.2  |
| 2233 | HLA-A*33:03 | ORF3a protein | 113 | 122 | 10 | YFLQSINFVR | netmhcpa_el                            | 0.17 |
| 2234 | HLA-A*01:01 | ORF3a protein | 206 | 215 | 10 | YFTSDYYQLY | Consensus (ann/smm)                    | 0.16 |
| 2235 | HLA-A*24:02 | ORF3a protein | 106 | 114 | 9  | LYLYALVYF  | Consensus (ann/smm)                    | 0.14 |
| 2236 | HLA-A*24:02 | ORF3a protein | 205 | 214 | 10 | SYFTSDYYQL | Consensus (ann/smm)                    | 0.14 |
| 2237 | HLA-A*03:01 | ORF3a protein | 123 | 132 | 10 | IIMRLWLCWK | Consensus (ann/smm)                    | 0.13 |
| 2238 | HLA-A*33:03 | ORF3a protein | 114 | 122 | 9  | FLQSINFVR  | netmhcpa_el                            | 0.13 |
| 2239 | HLA-A*01:01 | ORF3a protein | 207 | 215 | 9  | FTSDYYQLY  | Consensus (ann/smm)                    | 0.11 |
| 2240 | HLA-A*26:01 | ORF3a protein | 207 | 215 | 9  | FTSDYYQLY  | Consensus (ann/smm)                    | 0.11 |
| 2241 | HLA-A*02:01 | ORF3a protein | 107 | 115 | 9  | YLYALVYFL  | Consensus (ann/comblib_sidney2008/smm) | 0.1  |
| 2242 | HLA-A*11:01 | ORF6 protein  | 14  | 23  | 10 | ILLIIMRTFK | Consensus (ann/smm)                    | 0.95 |
| 2243 | HLA-A*01:01 | ORF6 protein  | 40  | 49  | 10 | LSKSLTENKY | Consensus (ann/smm)                    | 0.94 |
| 2244 | HLA-A*11:01 | ORF6 protein  | 15  | 23  | 9  | LLIIMRTFK  | Consensus (ann/smm)                    | 0.9  |
| 2245 | HLA-A*33:03 | ORF6 protein  | 30  | 38  | 9  | DYIINLIK   | netmhcpa_el                            | 0.86 |
| 2246 | HLA-A*02:06 | ORF6 protein  | 7   | 16  | 10 | FQVTIAEILL | Consensus (ann/smm)                    | 0.79 |
| 2247 | HLA-A*02:06 | ORF6 protein  | 16  | 24  | 9  | LIIMRTFKV  | Consensus (ann/smm)                    | 0.7  |
| 2248 | HLA-A*02:01 | ORF6 protein  | 15  | 24  | 10 | LLIIMRTFKV | Consensus (ann/smm)                    | 0.69 |
| 2249 | HLA-A*01:01 | ORF6 protein  | 23  | 31  | 9  | KVSIWNLDY  | Consensus (ann/smm)                    | 0.6  |
| 2250 | HLA-A*02:06 | ORF6 protein  | 7   | 15  | 9  | FQVTIAEIL  | Consensus (ann/smm)                    | 0.52 |
| 2251 | HLA-A*03:01 | ORF6 protein  | 15  | 23  | 9  | LLIIMRTFK  | Consensus (ann/smm)                    | 0.36 |
| 2252 | HLA-A*03:01 | ORF6 protein  | 14  | 23  | 10 | ILLIIMRTFK | Consensus (ann/smm)                    | 0.17 |
| 2253 | HLA-A*01:01 | ORF7a protein | 9   | 18  | 10 | LITLATCELY | Consensus (ann/smm)                    | 0.95 |
| 2254 | HLA-A*02:01 | ORF7a protein | 95  | 103 | 9  | ELYSPIFLI  | Consensus (ann/comblib_sidney2008/smm) | 0.95 |
| 2255 | HLA-A*31:01 | ORF7a protein | 110 | 118 | 9  | ITLCFTLKR  | Consensus (ann/smm)                    | 0.94 |
| 2256 | HLA-A*02:01 | ORF7a protein | 4   | 13  | 10 | ILFLALITLA | Consensus (ann/smm)                    | 0.91 |
| 2257 | HLA-A*01:01 | ORF7a protein | 10  | 18  | 9  | ITLATCELY  | Consensus (ann/smm)                    | 0.9  |
| 2258 | HLA-A*02:01 | ORF7a protein | 85  | 93  | 9  | KLFIRQEEV  | Consensus (ann/comblib_sidney2008/smm) | 0.9  |

|      |             |               |     |     |    |             |                                        |      |
|------|-------------|---------------|-----|-----|----|-------------|----------------------------------------|------|
| 2259 | HLA-A*02:06 | ORF7a protein | 101 | 110 | 10 | FLIVAAIVFI  | Consensus (ann/smm)                    | 0.9  |
| 2260 | HLA-A*11:01 | ORF7a protein | 107 | 117 | 11 | IVFITLCFTLK | Consensus (ann/smm)                    | 0.9  |
| 2261 | HLA-A*02:06 | ORF7a protein | 102 | 110 | 9  | LIVAAIVFI   | Consensus (ann/smm)                    | 0.85 |
| 2262 | HLA-A*03:01 | ORF7a protein | 111 | 119 | 9  | TLCFTLKRK   | Consensus (ann/smm)                    | 0.85 |
| 2263 | HLA-A*26:01 | ORF7a protein | 38  | 46  | 9  | GTYEGNSPF   | Consensus (ann/smm)                    | 0.84 |
| 2264 | HLA-A*24:02 | ORF7a protein | 100 | 109 | 10 | IFLIVAAIVF  | Consensus (ann/smm)                    | 0.79 |
| 2265 | HLA-A*11:01 | ORF7a protein | 110 | 117 | 8  | ITLCFTLK    | Consensus (ann/smm)                    | 0.78 |
| 2266 | HLA-A*33:03 | ORF7a protein | 80  | 89  | 10 | RSVSPKLFIR  | netmhcpa_el                            | 0.76 |
| 2267 | HLA-A*11:01 | ORF7a protein | 109 | 119 | 11 | FITLCFTLKRK | Consensus (ann/smm)                    | 0.75 |
| 2268 | HLA-A*02:01 | ORF7a protein | 6   | 14  | 9  | FLALITLAT   | Consensus (ann/comblib_sidney2008/smm) | 0.7  |
| 2269 | HLA-A*33:03 | ORF7a protein | 110 | 118 | 9  | ITLCFTLKR   | netmhcpa_el                            | 0.69 |
| 2270 | HLA-A*24:02 | ORF7a protein | 96  | 104 | 9  | LYSPIFLIV   | Consensus (ann/smm)                    | 0.64 |
| 2271 | HLA-A*11:01 | ORF7a protein | 110 | 118 | 9  | ITLCFTLKR   | Consensus (ann/smm)                    | 0.62 |
| 2272 | HLA-A*01:01 | ORF7a protein | 87  | 97  | 11 | FIRQEEVQELY | Consensus (ann/smm)                    | 0.6  |
| 2273 | HLA-A*02:01 | ORF7a protein | 4   | 12  | 9  | ILFLALITL   | Consensus (ann/comblib_sidney2008/smm) | 0.6  |
| 2274 | HLA-A*02:01 | ORF7a protein | 63  | 71  | 9  | FAFACPDGV   | Consensus (ann/comblib_sidney2008/smm) | 0.59 |
| 2275 | HLA-A*11:01 | ORF7a protein | 81  | 89  | 9  | SVSPKLFIR   | Consensus (ann/smm)                    | 0.46 |
| 2276 | HLA-A*31:01 | ORF7a protein | 81  | 89  | 9  | SVSPKLFIR   | Consensus (ann/smm)                    | 0.45 |
| 2277 | HLA-A*33:03 | ORF7a protein | 69  | 78  | 10 | DGVKHVYQLR  | netmhcpa_el                            | 0.45 |
| 2278 | HLA-A*24:02 | ORF7a protein | 108 | 116 | 9  | VFITLCFTL   | Consensus (ann/smm)                    | 0.44 |
| 2279 | HLA-A*01:01 | ORF7a protein | 11  | 20  | 10 | TLATCELYHY  | Consensus (ann/smm)                    | 0.35 |
| 2280 | HLA-A*33:03 | ORF7a protein | 73  | 80  | 8  | HVYQLRAR    | netmhcpa_el                            | 0.35 |
| 2281 | HLA-A*11:01 | ORF7a protein | 110 | 119 | 10 | ITLCFTLKRK  | Consensus (ann/smm)                    | 0.33 |
| 2282 | HLA-A*31:01 | ORF7a protein | 80  | 89  | 10 | RSVSPKLFIR  | Consensus (ann/smm)                    | 0.31 |
| 2283 | HLA-A*31:01 | ORF7a protein | 70  | 78  | 9  | GVKHVYQLR   | Consensus (ann/smm)                    | 0.29 |
| 2284 | HLA-A*26:01 | ORF7a protein | 92  | 101 | 10 | EVQELYSPIF  | Consensus (ann/smm)                    | 0.22 |
| 2285 | HLA-A*02:01 | ORF7a protein | 101 | 110 | 10 | FLIVAAIVFI  | Consensus (ann/smm)                    | 0.21 |
| 2286 | HLA-A*26:01 | ORF7a protein | 92  | 100 | 9  | EVQELYSPI   | Consensus (ann/smm)                    | 0.21 |
| 2287 | HLA-A*03:01 | ORF7a protein | 23  | 32  | 10 | CVRGTTVLLK  | Consensus (ann/smm)                    | 0.17 |

|      |             |               |     |     |    |             |                                        |      |
|------|-------------|---------------|-----|-----|----|-------------|----------------------------------------|------|
| 2288 | HLA-A*03:01 | ORF7a protein | 110 | 119 | 10 | ITLCFTLKRK  | Consensus (ann/smm)                    | 0.17 |
| 2289 | HLA-A*03:01 | ORF7a protein | 76  | 85  | 10 | QLRARSVSPK  | Consensus (ann/smm)                    | 0.16 |
| 2290 | HLA-A*33:03 | ORF7a protein | 70  | 78  | 9  | GVKHVYQLR   | netmhcpa_el                            | 0.11 |
| 2291 | HLA-A*33:03 | ORF7a protein | 81  | 89  | 9  | SVSPKLFIR   | netmhcpa_el                            | 0.03 |
| 2292 | HLA-A*02:06 | ORF7b         | 9   | 17  | 9  | FYLCFLAFL   | Consensus (ann/smm)                    | 1    |
| 2293 | HLA-A*02:06 | ORF7b         | 6   | 14  | 9  | LIDFYLCFL   | Consensus (ann/smm)                    | 0.94 |
| 2294 | HLA-A*02:01 | ORF7b         | 12  | 22  | 11 | CFLAFLFLVL  | Consensus (ann/smm)                    | 0.91 |
| 2295 | HLA-A*02:01 | ORF7b         | 16  | 24  | 9  | FLLFLVLIM   | Consensus (ann/comblib_sidney2008/smm) | 0.85 |
| 2296 | HLA-A*02:01 | ORF7b         | 17  | 26  | 10 | LLFLVLIMLI  | Consensus (ann/smm)                    | 0.85 |
| 2297 | HLA-A*24:02 | ORF7b         | 22  | 30  | 9  | LIMLIIFWF   | Consensus (ann/smm)                    | 0.79 |
| 2298 | HLA-A*02:06 | ORF7b         | 5   | 14  | 10 | SLIDFYLCFL  | Consensus (ann/smm)                    | 0.76 |
| 2299 | HLA-A*02:01 | ORF7b         | 16  | 26  | 11 | FLLFLVLIMLI | Consensus (ann/smm)                    | 0.75 |
| 2300 | HLA-A*24:02 | ORF7b         | 7   | 16  | 10 | IDFYLCFLAF  | Consensus (ann/smm)                    | 0.75 |
| 2301 | HLA-A*24:02 | ORF7b         | 8   | 16  | 9  | DFYLCFLAF   | Consensus (ann/smm)                    | 0.7  |
| 2302 | HLA-A*24:02 | ORF7b         | 10  | 19  | 10 | YLCFLAFLLF  | Consensus (ann/smm)                    | 0.67 |
| 2303 | HLA-A*24:02 | ORF7b         | 9   | 17  | 9  | FYLCFLAFL   | Consensus (ann/smm)                    | 0.54 |
| 2304 | HLA-A*02:06 | ORF7b         | 12  | 21  | 10 | CFLAFLFLV   | Consensus (ann/smm)                    | 0.48 |
| 2305 | HLA-A*02:01 | ORF7b         | 12  | 21  | 10 | CFLAFLFLV   | Consensus (ann/smm)                    | 0.47 |
| 2306 | HLA-A*02:01 | ORF7b         | 23  | 32  | 10 | IMLIIFWFSL  | Consensus (ann/smm)                    | 0.43 |
| 2307 | HLA-A*02:06 | ORF7b         | 24  | 32  | 9  | MLIIFWFSL   | Consensus (ann/smm)                    | 0.41 |
| 2308 | HLA-A*01:01 | ORF7b         | 1   | 10  | 10 | MIELSLIDFY  | Consensus (ann/smm)                    | 0.35 |
| 2309 | HLA-A*02:01 | ORF7b         | 10  | 18  | 9  | YLCFLAFL    | Consensus (ann/comblib_sidney2008/smm) | 0.3  |
| 2310 | HLA-A*02:01 | ORF7b         | 16  | 25  | 10 | FLLFLVLIML  | Consensus (ann/smm)                    | 0.3  |
| 2311 | HLA-A*24:02 | ORF7b         | 9   | 18  | 10 | FYLCFLAFL   | Consensus (ann/smm)                    | 0.28 |
| 2312 | HLA-A*02:01 | ORF7b         | 13  | 22  | 10 | FLAFLFLVL   | Consensus (ann/smm)                    | 0.26 |
| 2313 | HLA-A*02:01 | ORF7b         | 24  | 32  | 9  | MLIIFWFSL   | Consensus (ann/comblib_sidney2008/smm) | 0.2  |
| 2314 | HLA-A*02:01 | ORF7b         | 5   | 14  | 10 | SLIDFYLCFL  | Consensus (ann/smm)                    | 0.14 |
| 2315 | HLA-A*02:01 | ORF7b         | 13  | 21  | 9  | FLAFLFLV    | Consensus (ann/comblib_sidney2008/smm) | 0.1  |
| 2316 | HLA-A*02:06 | ORF7b         | 13  | 21  | 9  | FLAFLFLV    | Consensus (ann/smm)                    | 0.08 |

|      |             |                      |     |     |    |             |                                        |      |
|------|-------------|----------------------|-----|-----|----|-------------|----------------------------------------|------|
| 2317 | HLA-A*33:03 | ORF8 protein         | 106 | 115 | 10 | EDFLEYHDVR  | netmhcpa_el                            | 0.98 |
| 2318 | HLA-A*33:03 | ORF8 protein         | 103 | 111 | 9  | SFYEDFLEY   | netmhcpa_el                            | 0.88 |
| 2319 | HLA-A*24:02 | ORF8 protein         | 41  | 49  | 9  | FYSKWYIRV   | Consensus (ann/smm)                    | 0.8  |
| 2320 | HLA-A*02:06 | ORF8 protein         | 4   | 13  | 10 | LVFLGIITTV  | Consensus (ann/smm)                    | 0.79 |
| 2321 | HLA-A*33:03 | ORF8 protein         | 44  | 52  | 9  | KWYIRVGAR   | netmhcpa_el                            | 0.75 |
| 2322 | HLA-A*33:03 | ORF8 protein         | 45  | 53  | 9  | WYIRVGARK   | netmhcpa_el                            | 0.75 |
| 2323 | HLA-A*02:06 | ORF8 protein         | 73  | 81  | 9  | YIDIGNYTV   | Consensus (ann/smm)                    | 0.73 |
| 2324 | HLA-A*02:01 | ORF8 protein         | 6   | 13  | 8  | FLGIITTV    | Consensus (ann/smm)                    | 0.72 |
| 2325 | HLA-A*33:03 | ORF8 protein         | 39  | 48  | 10 | IHFYSKWYIR  | netmhcpa_el                            | 0.71 |
| 2326 | HLA-A*02:06 | ORF8 protein         | 31  | 39  | 9  | YVDDPCPI    | Consensus (ann/smm)                    | 0.68 |
| 2327 | HLA-A*01:01 | ORF8 protein         | 101 | 111 | 11 | RCSFYEDFLEY | Consensus (ann/smm)                    | 0.56 |
| 2328 | HLA-A*11:01 | ORF8 protein         | 86  | 94  | 9  | FTINCQEPK   | Consensus (ann/smm)                    | 0.54 |
| 2329 | HLA-A*02:06 | ORF8 protein         | 79  | 88  | 10 | YTVSCLPFTI  | Consensus (ann/smm)                    | 0.53 |
| 2330 | HLA-A*31:01 | ORF8 protein         | 39  | 48  | 10 | IHFYSKWYIR  | Consensus (ann/smm)                    | 0.53 |
| 2331 | HLA-A*02:01 | ORF8 protein         | 73  | 81  | 9  | YIDIGNYTV   | Consensus (ann/comblib_sidney2008/smm) | 0.5  |
| 2332 | HLA-A*02:01 | ORF8 protein         | 3   | 13  | 11 | FLVFLGIITTV | Consensus (ann/smm)                    | 0.46 |
| 2333 | HLA-A*31:01 | ORF8 protein         | 44  | 52  | 9  | KWYIRVGAR   | Consensus (ann/smm)                    | 0.46 |
| 2334 | HLA-A*26:01 | ORF8 protein         | 8   | 16  | 9  | GIITTVAAF   | Consensus (ann/smm)                    | 0.45 |
| 2335 | HLA-A*31:01 | ORF8 protein         | 41  | 48  | 8  | FYSKWYIR    | ann                                    | 0.38 |
| 2336 | HLA-A*24:02 | ORF8 protein         | 78  | 86  | 9  | NYTVSCLPF   | Consensus (ann/smm)                    | 0.34 |
| 2337 | HLA-A*01:01 | ORF8 protein         | 23  | 31  | 9  | QSCTQHQPYP  | Consensus (ann/smm)                    | 0.28 |
| 2338 | HLA-A*33:03 | ORF8 protein         | 107 | 115 | 9  | DFLEYHDVR   | netmhcpa_el                            | 0.27 |
| 2339 | HLA-A*01:01 | ORF8 protein         | 102 | 111 | 10 | CSFYEDFLEY  | Consensus (ann/smm)                    | 0.24 |
| 2340 | HLA-A*31:01 | ORF8 protein         | 40  | 48  | 9  | HFYSKWYIR   | Consensus (ann/smm)                    | 0.11 |
| 2341 | HLA-A*33:03 | ORF8 protein         | 40  | 48  | 9  | HFYSKWYIR   | netmhcpa_el                            | 0.02 |
| 2342 | HLA-A*01:01 | surface glycoprotein | 196 | 204 | 9  | NIDGYFKIY   | Consensus (ann/smm)                    | 1    |
| 2343 | HLA-A*26:01 | surface glycoprotein | 886 | 894 | 9  | WTFGAGAAL   | Consensus (ann/smm)                    | 0.99 |
| 2344 | HLA-A*26:01 | surface glycoprotein | 50  | 59  | 10 | STQDLFLPFF  | Consensus (ann/smm)                    | 0.99 |
| 2345 | HLA-A*01:01 | surface glycoprotein | 746 | 756 | 11 | STECNLLLQY  | Consensus (ann/smm)                    | 0.98 |

|      |             |                      |      |      |    |             |                                        |      |
|------|-------------|----------------------|------|------|----|-------------|----------------------------------------|------|
| 2346 | HLA-A*11:01 | surface glycoprotein | 161  | 170  | 10 | SSANNCTFEY  | Consensus (ann/smm)                    | 0.98 |
| 2347 | HLA-A*24:02 | surface glycoprotein | 755  | 763  | 9  | QYGSFCTQL   | Consensus (ann/smm)                    | 0.98 |
| 2348 | HLA-A*01:01 | surface glycoprotein | 152  | 160  | 9  | WMESEFRVY   | Consensus (ann/smm)                    | 0.97 |
| 2349 | HLA-A*02:06 | surface glycoprotein | 777  | 785  | 9  | NTQEVFQV    | Consensus (ann/smm)                    | 0.97 |
| 2350 | HLA-A*02:06 | surface glycoprotein | 269  | 277  | 9  | YLQPRTFLL   | Consensus (ann/smm)                    | 0.96 |
| 2351 | HLA-A*33:03 | surface glycoprotein | 839  | 847  | 9  | DCLGDIAAR   | netmhcpa_el                            | 0.96 |
| 2352 | HLA-A*02:01 | surface glycoprotein | 1223 | 1232 | 10 | GLIAIVMVTI  | Consensus (ann/smm)                    | 0.95 |
| 2353 | HLA-A*11:01 | surface glycoprotein | 348  | 356  | 9  | ASVYAWNPK   | Consensus (ann/smm)                    | 0.95 |
| 2354 | HLA-A*33:03 | surface glycoprotein | 310  | 319  | 10 | KGIYQTSNFR  | netmhcpa_el                            | 0.95 |
| 2355 | HLA-A*02:06 | surface glycoprotein | 51   | 59   | 9  | TQDLFLPFF   | Consensus (ann/smm)                    | 0.94 |
| 2356 | HLA-A*24:02 | surface glycoprotein | 898  | 906  | 9  | FAMQMAYRF   | Consensus (ann/smm)                    | 0.94 |
| 2357 | HLA-A*31:01 | surface glycoprotein | 454  | 462  | 9  | RLFRKSNLK   | Consensus (ann/smm)                    | 0.94 |
| 2358 | HLA-A*03:01 | surface glycoprotein | 1064 | 1073 | 10 | HVTYVPAQEK  | Consensus (ann/smm)                    | 0.93 |
| 2359 | HLA-A*03:01 | surface glycoprotein | 1020 | 1028 | 9  | ASANLAATK   | Consensus (ann/smm)                    | 0.93 |
| 2360 | HLA-A*24:02 | surface glycoprotein | 167  | 175  | 9  | TFEYVSQPF   | Consensus (ann/smm)                    | 0.93 |
| 2361 | HLA-A*26:01 | surface glycoprotein | 366  | 374  | 9  | SVLYNSASF   | Consensus (ann/smm)                    | 0.93 |
| 2362 | HLA-A*31:01 | surface glycoprotein | 311  | 319  | 9  | GIYQTSNFR   | Consensus (ann/smm)                    | 0.93 |
| 2363 | HLA-A*31:01 | surface glycoprotein | 35   | 44   | 10 | GVYYPDKVFR  | Consensus (ann/smm)                    | 0.93 |
| 2364 | HLA-A*33:03 | surface glycoprotein | 393  | 403  | 11 | TNVYADSFVIR | netmhcpa_el                            | 0.93 |
| 2365 | HLA-A*24:02 | surface glycoprotein | 635  | 644  | 10 | VYSTGSNVFQ  | Consensus (ann/smm)                    | 0.92 |
| 2366 | HLA-A*31:01 | surface glycoprotein | 757  | 765  | 9  | GSFCTQLNR   | Consensus (ann/smm)                    | 0.92 |
| 2367 | HLA-A*01:01 | surface glycoprotein | 414  | 423  | 10 | QTGKIADYNY  | Consensus (ann/smm)                    | 0.91 |
| 2368 | HLA-A*01:01 | surface glycoprotein | 29   | 38   | 10 | TNSFTRGVYY  | Consensus (ann/smm)                    | 0.91 |
| 2369 | HLA-A*03:01 | surface glycoprotein | 1019 | 1028 | 10 | RASANLAATK  | Consensus (ann/smm)                    | 0.91 |
| 2370 | HLA-A*03:01 | surface glycoprotein | 939  | 947  | 9  | SSTASALGK   | Consensus (ann/smm)                    | 0.91 |
| 2371 | HLA-A*03:01 | surface glycoprotein | 451  | 458  | 8  | YLRLFRK     | Consensus (ann/smm)                    | 0.91 |
| 2372 | HLA-A*11:01 | surface glycoprotein | 725  | 733  | 9  | EILPVSMTK   | Consensus (ann/smm)                    | 0.91 |
| 2373 | HLA-A*01:01 | surface glycoprotein | 387  | 396  | 10 | LNDLCFTNVY  | Consensus (ann/smm)                    | 0.9  |
| 2374 | HLA-A*02:01 | surface glycoprotein | 983  | 991  | 9  | RLDKVEAEV   | Consensus (ann/comblib_sidney2008/smm) | 0.9  |

|      |             |                      |      |      |    |             |                                        |      |
|------|-------------|----------------------|------|------|----|-------------|----------------------------------------|------|
| 2375 | HLA-A*02:01 | surface glycoprotein | 1048 | 1056 | 9  | HLMSFPQSA   | Consensus (ann/comblib_sidney2008/smm) | 0.9  |
| 2376 | HLA-A*03:01 | surface glycoprotein | 723  | 733  | 11 | TTEILPVSMTK | Consensus (ann/smm)                    | 0.9  |
| 2377 | HLA-A*24:02 | surface glycoprotein | 706  | 714  | 9  | AYSNNSIAI   | Consensus (ann/smm)                    | 0.9  |
| 2378 | HLA-A*24:02 | surface glycoprotein | 78   | 86   | 9  | RFDNPVLPF   | Consensus (ann/smm)                    | 0.9  |
| 2379 | HLA-A*02:06 | surface glycoprotein | 1215 | 1224 | 10 | YIWLGFIAGL  | Consensus (ann/smm)                    | 0.89 |
| 2380 | HLA-A*26:01 | surface glycoprotein | 940  | 948  | 9  | STASALGKL   | Consensus (ann/smm)                    | 0.89 |
| 2381 | HLA-A*11:01 | surface glycoprotein | 782  | 790  | 9  | FAQVKQIYK   | Consensus (ann/smm)                    | 0.86 |
| 2382 | HLA-A*33:03 | surface glycoprotein | 446  | 454  | 9  | GGNYNYLYR   | netmhspan_el                           | 0.86 |
| 2383 | HLA-A*33:03 | surface glycoprotein | 816  | 825  | 10 | SFIEDLLFNK  | netmhspan_el                           | 0.85 |
| 2384 | HLA-A*01:01 | surface glycoprotein | 1196 | 1206 | 11 | SLIDLQELGKY | Consensus (ann/smm)                    | 0.84 |
| 2385 | HLA-A*33:03 | surface glycoprotein | 1005 | 1014 | 10 | QTYVTQQLIR  | netmhspan_el                           | 0.84 |
| 2386 | HLA-A*01:01 | surface glycoprotein | 828  | 837  | 10 | LADAGFIKQY  | Consensus (ann/smm)                    | 0.82 |
| 2387 | HLA-A*11:01 | surface glycoprotein | 550  | 558  | 9  | GVLTESNKK   | Consensus (ann/smm)                    | 0.82 |
| 2388 | HLA-A*26:01 | surface glycoprotein | 780  | 788  | 9  | EVFAQVKQI   | Consensus (ann/smm)                    | 0.82 |
| 2389 | HLA-A*26:01 | surface glycoprotein | 1220 | 1228 | 9  | FIAGLIAIV   | Consensus (ann/smm)                    | 0.82 |
| 2390 | HLA-A*31:01 | surface glycoprotein | 12   | 21   | 10 | SSQCVNLTR   | Consensus (ann/smm)                    | 0.82 |
| 2391 | HLA-A*11:01 | surface glycoprotein | 817  | 825  | 9  | FIEDLLFNK   | Consensus (ann/smm)                    | 0.81 |
| 2392 | HLA-A*31:01 | surface glycoprotein | 395  | 403  | 9  | VYADSFVIR   | Consensus (ann/smm)                    | 0.81 |
| 2393 | HLA-A*33:03 | surface glycoprotein | 30   | 38   | 9  | NSFTRGVYY   | netmhspan_el                           | 0.81 |
| 2394 | HLA-A*33:03 | surface glycoprotein | 991  | 1000 | 10 | VQIDRLITGR  | netmhspan_el                           | 0.81 |
| 2395 | HLA-A*01:01 | surface glycoprotein | 269  | 279  | 11 | YLQPRTFLLKY | Consensus (ann/smm)                    | 0.8  |
| 2396 | HLA-A*01:01 | surface glycoprotein | 499  | 508  | 10 | PTNGVGYQPY  | Consensus (ann/smm)                    | 0.8  |
| 2397 | HLA-A*02:01 | surface glycoprotein | 718  | 726  | 9  | FTISVTTEI   | Consensus (ann/comblib_sidney2008/smm) | 0.8  |
| 2398 | HLA-A*33:03 | surface glycoprotein | 568  | 577  | 10 | DIADTTDAVR  | netmhspan_el                           | 0.8  |
| 2399 | HLA-A*03:01 | surface glycoprotein | 301  | 310  | 10 | CTLKSFTVEK  | Consensus (ann/smm)                    | 0.79 |
| 2400 | HLA-A*11:01 | surface glycoprotein | 1236 | 1245 | 10 | CMTSCCCLK   | Consensus (ann/smm)                    | 0.79 |
| 2401 | HLA-A*33:03 | surface glycoprotein | 264  | 273  | 10 | AYYVGYLQPR  | netmhspan_el                           | 0.79 |
| 2402 | HLA-A*11:01 | surface glycoprotein | 757  | 765  | 9  | GSFCTQLNR   | Consensus (ann/smm)                    | 0.78 |
| 2403 | HLA-A*11:01 | surface glycoprotein | 723  | 733  | 11 | TTEILPVSMTK | Consensus (ann/smm)                    | 0.78 |

|      |             |                      |      |      |    |            |                                        |      |
|------|-------------|----------------------|------|------|----|------------|----------------------------------------|------|
| 2404 | HLA-A*33:03 | surface glycoprotein | 348  | 357  | 10 | ASVYAWNRKR | netmhcpa_el                            | 0.78 |
| 2405 | HLA-A*33:03 | surface glycoprotein | 974  | 983  | 10 | SSVLNDILSR | netmhcpa_el                            | 0.78 |
| 2406 | HLA-A*02:01 | surface glycoprotein | 515  | 524  | 10 | FELLHAPATV | Consensus (ann/smm)                    | 0.77 |
| 2407 | HLA-A*33:03 | surface glycoprotein | 399  | 408  | 10 | SFVIRGDEVV | netmhcpa_el                            | 0.77 |
| 2408 | HLA-A*33:03 | surface glycoprotein | 558  | 567  | 10 | KFLPFQQFGR | netmhcpa_el                            | 0.77 |
| 2409 | HLA-A*26:01 | surface glycoprotein | 895  | 904  | 10 | QIPFAMQMAY | Consensus (ann/smm)                    | 0.76 |
| 2410 | HLA-A*33:03 | surface glycoprotein | 782  | 790  | 9  | FAQVKQIYK  | netmhcpa_el                            | 0.75 |
| 2411 | HLA-A*33:03 | surface glycoprotein | 207  | 214  | 8  | HTPINLVR   | netmhcpa_el                            | 0.75 |
| 2412 | HLA-A*01:01 | surface glycoprotein | 135  | 144  | 10 | FCNDPFLGVY | Consensus (ann/smm)                    | 0.74 |
| 2413 | HLA-A*33:03 | surface glycoprotein | 450  | 457  | 8  | NYLYRLFR   | netmhcpa_el                            | 0.73 |
| 2414 | HLA-A*01:01 | surface glycoprotein | 746  | 754  | 9  | STECSNLLL  | Consensus (ann/smm)                    | 0.72 |
| 2415 | HLA-A*03:01 | surface glycoprotein | 409  | 417  | 9  | QIAPGQTGK  | Consensus (ann/smm)                    | 0.72 |
| 2416 | HLA-A*02:06 | surface glycoprotein | 894  | 902  | 9  | LQIPFAMQM  | Consensus (ann/smm)                    | 0.71 |
| 2417 | HLA-A*11:01 | surface glycoprotein | 269  | 278  | 10 | YLQPRTFLLK | Consensus (ann/smm)                    | 0.71 |
| 2418 | HLA-A*26:01 | surface glycoprotein | 192  | 201  | 10 | FVFKNIDGYF | Consensus (ann/smm)                    | 0.71 |
| 2419 | HLA-A*31:01 | surface glycoprotein | 348  | 357  | 10 | ASVYAWNRKR | Consensus (ann/smm)                    | 0.71 |
| 2420 | HLA-A*02:01 | surface glycoprotein | 417  | 425  | 9  | KIADYNYKL  | Consensus (ann/comblib_sidney2008/smm) | 0.7  |
| 2421 | HLA-A*02:01 | surface glycoprotein | 1000 | 1008 | 9  | RLQSLQTYV  | Consensus (ann/comblib_sidney2008/smm) | 0.7  |
| 2422 | HLA-A*03:01 | surface glycoprotein | 370  | 378  | 9  | NSASFSTFK  | Consensus (ann/smm)                    | 0.7  |
| 2423 | HLA-A*01:01 | surface glycoprotein | 160  | 168  | 9  | YSSANNCTF  | Consensus (ann/smm)                    | 0.69 |
| 2424 | HLA-A*03:01 | surface glycoprotein | 104  | 113  | 10 | WIFGTTLDSK | Consensus (ann/smm)                    | 0.69 |
| 2425 | HLA-A*11:01 | surface glycoprotein | 975  | 983  | 9  | SVLNDILSR  | Consensus (ann/smm)                    | 0.69 |
| 2426 | HLA-A*11:01 | surface glycoprotein | 1019 | 1028 | 10 | RASANLAATK | Consensus (ann/smm)                    | 0.69 |
| 2427 | HLA-A*03:01 | surface glycoprotein | 378  | 386  | 9  | KCYGVSPVK  | Consensus (ann/smm)                    | 0.68 |
| 2428 | HLA-A*24:02 | surface glycoprotein | 1211 | 1219 | 9  | KWPWYIWLG  | Consensus (ann/smm)                    | 0.68 |
| 2429 | HLA-A*26:01 | surface glycoprotein | 554  | 562  | 9  | ESNKKFLPF  | Consensus (ann/smm)                    | 0.68 |
| 2430 | HLA-A*03:01 | surface glycoprotein | 827  | 835  | 9  | TLADAGFIK  | Consensus (ann/smm)                    | 0.67 |
| 2431 | HLA-A*11:01 | surface glycoprotein | 956  | 964  | 9  | AQALNTLVK  | Consensus (ann/smm)                    | 0.67 |
| 2432 | HLA-A*31:01 | surface glycoprotein | 449  | 457  | 9  | YNYLYRLFR  | Consensus (ann/smm)                    | 0.67 |

|      |             |                      |      |      |    |             |                     |      |
|------|-------------|----------------------|------|------|----|-------------|---------------------|------|
| 2433 | HLA-A*33:03 | surface glycoprotein | 673  | 682  | 10 | SYQTQTNSPR  | netmhcpa_el         | 0.66 |
| 2434 | HLA-A*02:06 | surface glycoprotein | 133  | 142  | 10 | FQFCNDPFLG  | Consensus (ann/smm) | 0.65 |
| 2435 | HLA-A*03:01 | surface glycoprotein | 1196 | 1205 | 10 | SLIDLQELGK  | Consensus (ann/smm) | 0.65 |
| 2436 | HLA-A*02:06 | surface glycoprotein | 643  | 651  | 9  | FQTRAGCLI   | Consensus (ann/smm) | 0.64 |
| 2437 | HLA-A*11:01 | surface glycoprotein | 192  | 202  | 11 | FVFKNIDGYFK | Consensus (ann/smm) | 0.64 |
| 2438 | HLA-A*24:02 | surface glycoprotein | 144  | 152  | 9  | YYHKNNKSW   | Consensus (ann/smm) | 0.64 |
| 2439 | HLA-A*31:01 | surface glycoprotein | 677  | 685  | 9  | QTNSPRRAR   | Consensus (ann/smm) | 0.64 |
| 2440 | HLA-A*31:01 | surface glycoprotein | 673  | 682  | 10 | SYQTQTNSPR  | Consensus (ann/smm) | 0.64 |
| 2441 | HLA-A*01:01 | surface glycoprotein | 136  | 145  | 10 | CNDPFLGVYY  | Consensus (ann/smm) | 0.63 |
| 2442 | HLA-A*01:01 | surface glycoprotein | 733  | 741  | 9  | KTSVDCTMY   | Consensus (ann/smm) | 0.63 |
| 2443 | HLA-A*03:01 | surface glycoprotein | 408  | 417  | 10 | RQIAPGQTGK  | Consensus (ann/smm) | 0.63 |
| 2444 | HLA-A*33:03 | surface glycoprotein | 94   | 102  | 9  | STKSNIIR    | netmhcpa_el         | 0.62 |
| 2445 | HLA-A*02:06 | surface glycoprotein | 720  | 729  | 10 | ISVTTEILPV  | Consensus (ann/smm) | 0.61 |
| 2446 | HLA-A*03:01 | surface glycoprotein | 938  | 947  | 10 | LSSTASALGK  | Consensus (ann/smm) | 0.61 |
| 2447 | HLA-A*26:01 | surface glycoprotein | 718  | 726  | 9  | FTISVTTEI   | Consensus (ann/smm) | 0.61 |
| 2448 | HLA-A*33:03 | surface glycoprotein | 370  | 378  | 9  | NSASFSTFK   | netmhcpa_el         | 0.61 |
| 2449 | HLA-A*33:03 | surface glycoprotein | 138  | 147  | 10 | DPFLGVYYHK  | netmhcpa_el         | 0.61 |
| 2450 | HLA-A*01:01 | surface glycoprotein | 27   | 37   | 11 | AYTNSFTRGVY | Consensus (ann/smm) | 0.6  |
| 2451 | HLA-A*02:06 | surface glycoprotein | 718  | 726  | 9  | FTISVTTEI   | Consensus (ann/smm) | 0.6  |
| 2452 | HLA-A*11:01 | surface glycoprotein | 371  | 378  | 8  | SASFSTFK    | Consensus (ann/smm) | 0.6  |
| 2453 | HLA-A*33:03 | surface glycoprotein | 37   | 44   | 8  | YYPDKVFR    | netmhcpa_el         | 0.6  |
| 2454 | HLA-A*01:01 | surface glycoprotein | 257  | 266  | 10 | GWTAGAAAYY  | Consensus (ann/smm) | 0.59 |
| 2455 | HLA-A*26:01 | surface glycoprotein | 166  | 175  | 10 | CTFEYVSQPF  | Consensus (ann/smm) | 0.59 |
| 2456 | HLA-A*33:03 | surface glycoprotein | 302  | 310  | 9  | TLKSFTVEK   | netmhcpa_el         | 0.59 |
| 2457 | HLA-A*01:01 | surface glycoprotein | 136  | 144  | 9  | CNDPFLGVY   | Consensus (ann/smm) | 0.58 |
| 2458 | HLA-A*02:06 | surface glycoprotein | 1060 | 1068 | 9  | VVFLHVITYV  | Consensus (ann/smm) | 0.58 |
| 2459 | HLA-A*26:01 | surface glycoprotein | 1095 | 1103 | 9  | FVSNNGTHWF  | Consensus (ann/smm) | 0.58 |
| 2460 | HLA-A*11:01 | surface glycoprotein | 302  | 310  | 9  | TLKSFTVEK   | Consensus (ann/smm) | 0.57 |
| 2461 | HLA-A*02:06 | surface glycoprotein | 964  | 973  | 10 | KQLSSNFGAI  | Consensus (ann/smm) | 0.56 |

|      |             |                      |      |      |    |             |                                        |      |
|------|-------------|----------------------|------|------|----|-------------|----------------------------------------|------|
| 2462 | HLA-A*33:03 | surface glycoprotein | 26   | 34   | 9  | PAYTNSFTR   | netmhcpa_el                            | 0.56 |
| 2463 | HLA-A*33:03 | surface glycoprotein | 58   | 66   | 9  | FFSNVTWFH   | netmhcpa_el                            | 0.56 |
| 2464 | HLA-A*02:06 | surface glycoprotein | 754  | 763  | 10 | LQYGSFCTQL  | Consensus (ann/smm)                    | 0.55 |
| 2465 | HLA-A*24:02 | surface glycoprotein | 488  | 498  | 11 | CYFPLQSYGFQ | Consensus (ann/smm)                    | 0.55 |
| 2466 | HLA-A*24:02 | surface glycoprotein | 1094 | 1103 | 10 | VFVSNQTHWF  | Consensus (ann/smm)                    | 0.55 |
| 2467 | HLA-A*24:02 | surface glycoprotein | 203  | 212  | 10 | IYSKHTPINL  | Consensus (ann/smm)                    | 0.55 |
| 2468 | HLA-A*33:03 | surface glycoprotein | 675  | 683  | 9  | QTQTNPRR    | netmhcpa_el                            | 0.55 |
| 2469 | HLA-A*33:03 | surface glycoprotein | 898  | 905  | 8  | FAMQMAYR    | netmhcpa_el                            | 0.55 |
| 2470 | HLA-A*31:01 | surface glycoprotein | 264  | 273  | 10 | AYYVGYLQPR  | Consensus (ann/smm)                    | 0.54 |
| 2471 | HLA-A*31:01 | surface glycoprotein | 457  | 466  | 10 | RKSNLKPFR   | Consensus (ann/smm)                    | 0.54 |
| 2472 | HLA-A*33:03 | surface glycoprotein | 193  | 202  | 10 | VFKNIDGYFK  | netmhcpa_el                            | 0.54 |
| 2473 | HLA-A*01:01 | surface glycoprotein | 285  | 293  | 9  | ITDAVDCAL   | Consensus (ann/smm)                    | 0.53 |
| 2474 | HLA-A*03:01 | surface glycoprotein | 302  | 310  | 9  | TLKSFTVEK   | Consensus (ann/smm)                    | 0.53 |
| 2475 | HLA-A*24:02 | surface glycoprotein | 634  | 643  | 10 | RVYSTGSNVF  | Consensus (ann/smm)                    | 0.53 |
| 2476 | HLA-A*33:03 | surface glycoprotein | 992  | 1000 | 9  | QIDRLITGR   | netmhcpa_el                            | 0.53 |
| 2477 | HLA-A*02:01 | surface glycoprotein | 1215 | 1224 | 10 | YIWLGFIAGL  | Consensus (ann/smm)                    | 0.52 |
| 2478 | HLA-A*11:01 | surface glycoprotein | 938  | 947  | 10 | LSSTASALGK  | Consensus (ann/smm)                    | 0.52 |
| 2479 | HLA-A*24:02 | surface glycoprotein | 1066 | 1075 | 10 | TYVPAQEKNF  | Consensus (ann/smm)                    | 0.51 |
| 2480 | HLA-A*33:03 | surface glycoprotein | 676  | 685  | 10 | TQTNSPRRAR  | netmhcpa_el                            | 0.51 |
| 2481 | HLA-A*01:01 | surface glycoprotein | 30   | 38   | 9  | NSFTRGVYY   | Consensus (ann/smm)                    | 0.5  |
| 2482 | HLA-A*02:01 | surface glycoprotein | 2    | 10   | 9  | FVFLVLLPL   | Consensus (ann/comblib_sidney2008/smm) | 0.5  |
| 2483 | HLA-A*33:03 | surface glycoprotein | 400  | 408  | 9  | FVIRGDEVR   | netmhcpa_el                            | 0.5  |
| 2484 | HLA-A*33:03 | surface glycoprotein | 458  | 466  | 9  | KSNLKPFR    | netmhcpa_el                            | 0.5  |
| 2485 | HLA-A*01:01 | surface glycoprotein | 1197 | 1206 | 10 | LIDLQELGKY  | Consensus (ann/smm)                    | 0.49 |
| 2486 | HLA-A*33:03 | surface glycoprotein | 1098 | 1107 | 10 | NGTHWFVTQR  | netmhcpa_el                            | 0.49 |
| 2487 | HLA-A*03:01 | surface glycoprotein | 41   | 49   | 9  | KVFRSSVLH   | Consensus (ann/smm)                    | 0.48 |
| 2488 | HLA-A*33:03 | surface glycoprotein | 559  | 567  | 9  | FLPFQQFGR   | netmhcpa_el                            | 0.48 |
| 2489 | HLA-A*03:01 | surface glycoprotein | 786  | 795  | 10 | KQIYKTPPIK  | Consensus (ann/smm)                    | 0.47 |
| 2490 | HLA-A*01:01 | surface glycoprotein | 440  | 449  | 10 | NLDSKVGQNY  | Consensus (ann/smm)                    | 0.46 |

|      |             |                      |      |      |    |             |                                        |      |
|------|-------------|----------------------|------|------|----|-------------|----------------------------------------|------|
| 2491 | HLA-A*11:01 | surface glycoprotein | 827  | 835  | 9  | TLADAGFIK   | Consensus (ann/smm)                    | 0.46 |
| 2492 | HLA-A*24:02 | surface glycoprotein | 268  | 277  | 10 | GYLQPRTFLL  | Consensus (ann/smm)                    | 0.46 |
| 2493 | HLA-A*26:01 | surface glycoprotein | 50   | 58   | 9  | STQDLFLPF   | Consensus (ann/smm)                    | 0.46 |
| 2494 | HLA-A*01:01 | surface glycoprotein | 865  | 874  | 10 | LTDEMIAQYT  | Consensus (ann/smm)                    | 0.45 |
| 2495 | HLA-A*24:02 | surface glycoprotein | 169  | 177  | 9  | EYVSQPFLM   | Consensus (ann/smm)                    | 0.45 |
| 2496 | HLA-A*33:03 | surface glycoprotein | 725  | 733  | 9  | EILPVSMTK   | netmhcpa_el                            | 0.44 |
| 2497 | HLA-A*11:01 | surface glycoprotein | 142  | 150  | 9  | GVVYHKNNK   | Consensus (ann/smm)                    | 0.43 |
| 2498 | HLA-A*26:01 | surface glycoprotein | 583  | 592  | 10 | EILDITPCSF  | Consensus (ann/smm)                    | 0.43 |
| 2499 | HLA-A*02:01 | surface glycoprotein | 386  | 395  | 10 | KLNDLCFTNV  | Consensus (ann/smm)                    | 0.42 |
| 2500 | HLA-A*11:01 | surface glycoprotein | 1196 | 1205 | 10 | SLIDLQELGK  | Consensus (ann/smm)                    | 0.42 |
| 2501 | HLA-A*02:06 | surface glycoprotein | 817  | 826  | 10 | FIEDLLFNKV  | Consensus (ann/smm)                    | 0.41 |
| 2502 | HLA-A*11:01 | surface glycoprotein | 1020 | 1028 | 9  | ASANLAATK   | Consensus (ann/smm)                    | 0.41 |
| 2503 | HLA-A*02:01 | surface glycoprotein | 1220 | 1228 | 9  | FIAGLIAIV   | Consensus (ann/comblib_sidney2008/smm) | 0.4  |
| 2504 | HLA-A*03:01 | surface glycoprotein | 1236 | 1245 | 10 | CMTSCCCLK   | Consensus (ann/smm)                    | 0.4  |
| 2505 | HLA-A*11:01 | surface glycoprotein | 1065 | 1073 | 9  | VTYVPAQEK   | Consensus (ann/smm)                    | 0.4  |
| 2506 | HLA-A*11:01 | surface glycoprotein | 370  | 378  | 9  | NSASFSTFK   | Consensus (ann/smm)                    | 0.4  |
| 2507 | HLA-A*33:03 | surface glycoprotein | 69   | 78   | 10 | HVSGTNGTKR  | netmhcpa_el                            | 0.4  |
| 2508 | HLA-A*11:01 | surface glycoprotein | 816  | 825  | 10 | SFIEDLLFNK  | Consensus (ann/smm)                    | 0.39 |
| 2509 | HLA-A*24:02 | surface glycoprotein | 1205 | 1214 | 10 | KYEYIKWPW   | Consensus (ann/smm)                    | 0.39 |
| 2510 | HLA-A*31:01 | surface glycoprotein | 349  | 357  | 9  | SVYAWNRKR   | Consensus (ann/smm)                    | 0.39 |
| 2511 | HLA-A*33:03 | surface glycoprotein | 198  | 206  | 9  | DGYFKIYSK   | netmhcpa_el                            | 0.39 |
| 2512 | HLA-A*33:03 | surface glycoprotein | 896  | 905  | 10 | IPFAMQMAYR  | netmhcpa_el                            | 0.39 |
| 2513 | HLA-A*01:01 | surface glycoprotein | 361  | 369  | 9  | CVADYSVLY   | Consensus (ann/smm)                    | 0.38 |
| 2514 | HLA-A*02:06 | surface glycoprotein | 786  | 794  | 9  | KQIYKTPPI   | Consensus (ann/smm)                    | 0.38 |
| 2515 | HLA-A*03:01 | surface glycoprotein | 1237 | 1245 | 9  | MTSCCCLK    | Consensus (ann/smm)                    | 0.38 |
| 2516 | HLA-A*24:02 | surface glycoprotein | 328  | 338  | 11 | RFPNITNLCPF | Consensus (ann/smm)                    | 0.38 |
| 2517 | HLA-A*26:01 | surface glycoprotein | 28   | 37   | 10 | YTNSFTRGVY  | Consensus (ann/smm)                    | 0.38 |
| 2518 | HLA-A*31:01 | surface glycoprotein | 448  | 457  | 10 | NYNLYRLFR   | Consensus (ann/smm)                    | 0.38 |
| 2519 | HLA-A*02:06 | surface glycoprotein | 258  | 267  | 10 | WTAGAAAYV   | Consensus (ann/smm)                    | 0.37 |

|      |             |                      |      |      |    |            |                                        |      |
|------|-------------|----------------------|------|------|----|------------|----------------------------------------|------|
| 2520 | HLA-A*02:06 | surface glycoprotein | 2    | 10   | 9  | FVFLVLLPL  | Consensus (ann/smm)                    | 0.37 |
| 2521 | HLA-A*33:03 | surface glycoprotein | 229  | 237  | 9  | LPIGINITR  | netmhcpa_el                            | 0.37 |
| 2522 | HLA-A*24:02 | surface glycoprotein | 350  | 358  | 9  | VYAWNKRRI  | Consensus (ann/smm)                    | 0.34 |
| 2523 | HLA-A*24:02 | surface glycoprotein | 312  | 320  | 9  | IYQTSNFRV  | Consensus (ann/smm)                    | 0.34 |
| 2524 | HLA-A*33:03 | surface glycoprotein | 450  | 458  | 9  | NYLYRLFRK  | netmhcpa_el                            | 0.34 |
| 2525 | HLA-A*11:01 | surface glycoprotein | 454  | 462  | 9  | RLFRKSNLK  | Consensus (ann/smm)                    | 0.33 |
| 2526 | HLA-A*11:01 | surface glycoprotein | 301  | 310  | 10 | CTLKSFTVEK | Consensus (ann/smm)                    | 0.33 |
| 2527 | HLA-A*24:02 | surface glycoprotein | 897  | 906  | 10 | PFAMQMAYRF | Consensus (ann/smm)                    | 0.33 |
| 2528 | HLA-A*24:02 | surface glycoprotein | 507  | 515  | 9  | PYRVVLSF   | Consensus (ann/smm)                    | 0.33 |
| 2529 | HLA-A*31:01 | surface glycoprotein | 237  | 246  | 10 | RFQTLALHR  | Consensus (ann/smm)                    | 0.33 |
| 2530 | HLA-A*02:06 | surface glycoprotein | 1220 | 1228 | 9  | FIAGLIAIV  | Consensus (ann/smm)                    | 0.32 |
| 2531 | HLA-A*11:01 | surface glycoprotein | 939  | 947  | 9  | SSTASALGK  | Consensus (ann/smm)                    | 0.32 |
| 2532 | HLA-A*02:01 | surface glycoprotein | 269  | 277  | 9  | YLQPRFLL   | Consensus (ann/comblib_sidney2008/smm) | 0.3  |
| 2533 | HLA-A*02:06 | surface glycoprotein | 964  | 972  | 9  | KQLSSNFGA  | Consensus (ann/smm)                    | 0.3  |
| 2534 | HLA-A*33:03 | surface glycoprotein | 897  | 905  | 9  | PFAMQMAYR  | netmhcpa_el                            | 0.3  |
| 2535 | HLA-A*33:03 | surface glycoprotein | 1006 | 1014 | 9  | TYVTQQLIR  | netmhcpa_el                            | 0.3  |
| 2536 | HLA-A*33:03 | surface glycoprotein | 448  | 457  | 10 | NYNYLYRLFR | netmhcpa_el                            | 0.29 |
| 2537 | HLA-A*01:01 | surface glycoprotein | 604  | 612  | 9  | TSNQVAVLY  | Consensus (ann/smm)                    | 0.28 |
| 2538 | HLA-A*01:01 | surface glycoprotein | 864  | 873  | 10 | LLTDEMIAQY | Consensus (ann/smm)                    | 0.28 |
| 2539 | HLA-A*02:01 | surface glycoprotein | 2    | 11   | 10 | FVFLVLLPLV | Consensus (ann/smm)                    | 0.28 |
| 2540 | HLA-A*11:01 | surface glycoprotein | 724  | 733  | 10 | TEILPVSMTK | Consensus (ann/smm)                    | 0.28 |
| 2541 | HLA-A*31:01 | surface glycoprotein | 310  | 319  | 10 | KGIYQTSNFR | Consensus (ann/smm)                    | 0.28 |
| 2542 | HLA-A*33:03 | surface glycoprotein | 228  | 237  | 10 | DLPIGINITR | netmhcpa_el                            | 0.28 |
| 2543 | HLA-A*01:01 | surface glycoprotein | 603  | 612  | 10 | NTSNQVAVLY | Consensus (ann/smm)                    | 0.27 |
| 2544 | HLA-A*03:01 | surface glycoprotein | 1065 | 1073 | 9  | VTYVPAQEK  | Consensus (ann/smm)                    | 0.27 |
| 2545 | HLA-A*03:01 | surface glycoprotein | 787  | 795  | 9  | QIYKTPPIK  | Consensus (ann/smm)                    | 0.27 |
| 2546 | HLA-A*33:03 | surface glycoprotein | 346  | 355  | 10 | RFASVYAWNR | netmhcpa_el                            | 0.27 |
| 2547 | HLA-A*31:01 | surface glycoprotein | 150  | 158  | 9  | KSWMESEFR  | Consensus (ann/smm)                    | 0.26 |
| 2548 | HLA-A*33:03 | surface glycoprotein | 638  | 646  | 9  | TGSNVFQTR  | netmhcpa_el                            | 0.26 |

|      |             |                      |      |      |    |             |                     |      |
|------|-------------|----------------------|------|------|----|-------------|---------------------|------|
| 2549 | HLA-A*01:01 | surface glycoprotein | 161  | 170  | 10 | SSANNCTFEY  | Consensus (ann/smm) | 0.25 |
| 2550 | HLA-A*31:01 | surface glycoprotein | 346  | 355  | 10 | RFASVYAWNR  | Consensus (ann/smm) | 0.25 |
| 2551 | HLA-A*31:01 | surface glycoprotein | 1099 | 1107 | 9  | GTHWFVTQR   | Consensus (ann/smm) | 0.24 |
| 2552 | HLA-A*11:01 | surface glycoprotein | 89   | 97   | 9  | GVYFASTEK   | Consensus (ann/smm) | 0.23 |
| 2553 | HLA-A*33:03 | surface glycoprotein | 637  | 646  | 10 | STGSNVFQTR  | netmhcpa_el         | 0.23 |
| 2554 | HLA-A*11:01 | surface glycoprotein | 826  | 835  | 10 | VTLADAGFIK  | Consensus (ann/smm) | 0.22 |
| 2555 | HLA-A*26:01 | surface glycoprotein | 191  | 200  | 10 | EFVFKNIDGY  | Consensus (ann/smm) | 0.22 |
| 2556 | HLA-A*02:01 | surface glycoprotein | 1095 | 1104 | 10 | FVSNQTHWFV  | Consensus (ann/smm) | 0.21 |
| 2557 | HLA-A*24:02 | surface glycoprotein | 1208 | 1217 | 10 | QYIKWPWYIW  | Consensus (ann/smm) | 0.21 |
| 2558 | HLA-A*33:03 | surface glycoprotein | 347  | 355  | 9  | FASVYAWNR   | netmhcpa_el         | 0.21 |
| 2559 | HLA-A*03:01 | surface glycoprotein | 89   | 97   | 9  | GVYFASTEK   | Consensus (ann/smm) | 0.2  |
| 2560 | HLA-A*03:01 | surface glycoprotein | 142  | 150  | 9  | GVYYHKNNK   | Consensus (ann/smm) | 0.2  |
| 2561 | HLA-A*11:01 | surface glycoprotein | 1237 | 1245 | 9  | MTSCCCLK    | Consensus (ann/smm) | 0.2  |
| 2562 | HLA-A*24:02 | surface glycoprotein | 367  | 377  | 11 | VLYNSASFSTF | Consensus (ann/smm) | 0.2  |
| 2563 | HLA-A*33:03 | surface glycoprotein | 449  | 457  | 9  | YNYLYRLFR   | netmhcpa_el         | 0.2  |
| 2564 | HLA-A*33:03 | surface glycoprotein | 501  | 509  | 9  | NGVGYQPYR   | netmhcpa_el         | 0.2  |
| 2565 | HLA-A*33:03 | surface glycoprotein | 35   | 44   | 10 | GVYYPDKVFR  | netmhcpa_el         | 0.2  |
| 2566 | HLA-A*02:06 | surface glycoprotein | 612  | 620  | 9  | YQDVNCTEV   | Consensus (ann/smm) | 0.19 |
| 2567 | HLA-A*26:01 | surface glycoprotein | 686  | 695  | 10 | SVASQSIIAY  | Consensus (ann/smm) | 0.19 |
| 2568 | HLA-A*31:01 | surface glycoprotein | 182  | 190  | 9  | KQGNFKNLR   | Consensus (ann/smm) | 0.19 |
| 2569 | HLA-A*02:06 | surface glycoprotein | 900  | 909  | 10 | MQMAYRFNGI  | Consensus (ann/smm) | 0.18 |
| 2570 | HLA-A*02:06 | surface glycoprotein | 1095 | 1104 | 10 | FVSNQTHWFV  | Consensus (ann/smm) | 0.18 |
| 2571 | HLA-A*03:01 | surface glycoprotein | 269  | 278  | 10 | YLQPRFTLLK  | Consensus (ann/smm) | 0.18 |
| 2572 | HLA-A*31:01 | surface glycoprotein | 36   | 44   | 9  | VYYPDKVFR   | Consensus (ann/smm) | 0.18 |
| 2573 | HLA-A*01:01 | surface glycoprotein | 258  | 266  | 9  | WTAGAAAYY   | Consensus (ann/smm) | 0.17 |
| 2574 | HLA-A*01:01 | surface glycoprotein | 28   | 37   | 10 | YTNSFTRGVY  | Consensus (ann/smm) | 0.17 |
| 2575 | HLA-A*01:01 | surface glycoprotein | 863  | 873  | 11 | PLLTDEMIQY  | Consensus (ann/smm) | 0.17 |
| 2576 | HLA-A*24:02 | surface glycoprotein | 635  | 643  | 9  | VYSTGSNVF   | Consensus (ann/smm) | 0.17 |
| 2577 | HLA-A*24:02 | surface glycoprotein | 448  | 456  | 9  | NYNYLYRLF   | Consensus (ann/smm) | 0.17 |

|      |             |                      |      |      |    |             |                     |      |
|------|-------------|----------------------|------|------|----|-------------|---------------------|------|
| 2578 | HLA-A*24:02 | surface glycoprotein | 489  | 497  | 9  | YFPLQSYGF   | Consensus (ann/smm) | 0.17 |
| 2579 | HLA-A*26:01 | surface glycoprotein | 361  | 369  | 9  | CVADYSVLV   | Consensus (ann/smm) | 0.17 |
| 2580 | HLA-A*26:01 | surface glycoprotein | 298  | 306  | 9  | ETKCTLKSF   | Consensus (ann/smm) | 0.17 |
| 2581 | HLA-A*33:03 | surface glycoprotein | 311  | 319  | 9  | GIYQTSNFR   | netmhcpa_el         | 0.17 |
| 2582 | HLA-A*24:02 | surface glycoprotein | 265  | 275  | 11 | YYVGYLQPRTF | Consensus (ann/smm) | 0.15 |
| 2583 | HLA-A*31:01 | surface glycoprotein | 458  | 466  | 9  | KSNLKPFR    | Consensus (ann/smm) | 0.14 |
| 2584 | HLA-A*31:01 | surface glycoprotein | 558  | 567  | 10 | KFLPFQFGR   | Consensus (ann/smm) | 0.14 |
| 2585 | HLA-A*26:01 | surface glycoprotein | 780  | 789  | 10 | EVFAQVKQIY  | Consensus (ann/smm) | 0.13 |
| 2586 | HLA-A*33:03 | surface glycoprotein | 265  | 273  | 9  | YYVGYLQPR   | netmhcpa_el         | 0.13 |
| 2587 | HLA-A*24:02 | surface glycoprotein | 159  | 168  | 10 | VYSSANNCTF  | Consensus (ann/smm) | 0.12 |
| 2588 | HLA-A*24:02 | surface glycoprotein | 488  | 497  | 10 | CYFPLQSYGF  | Consensus (ann/smm) | 0.12 |
| 2589 | HLA-A*33:03 | surface glycoprotein | 395  | 403  | 9  | VYADSFVIR   | netmhcpa_el         | 0.12 |
| 2590 | HLA-A*01:01 | surface glycoprotein | 865  | 873  | 9  | LTDEMIAQY   | Consensus (ann/smm) | 0.11 |
| 2591 | HLA-A*02:06 | surface glycoprotein | 133  | 141  | 9  | FQFCNDPFL   | Consensus (ann/smm) | 0.11 |
| 2592 | HLA-A*24:02 | surface glycoprotein | 368  | 377  | 10 | LYNSASFSTF  | Consensus (ann/smm) | 0.11 |
| 2593 | HLA-A*24:02 | surface glycoprotein | 1211 | 1220 | 10 | KWPWYIWLGF  | Consensus (ann/smm) | 0.11 |
| 2594 | HLA-A*24:02 | surface glycoprotein | 1208 | 1216 | 9  | QYIKWPWYI   | Consensus (ann/smm) | 0.11 |
| 2595 | HLA-A*26:01 | surface glycoprotein | 192  | 200  | 9  | FVFKNIDGY   | Consensus (ann/smm) | 0.11 |
| 2596 | HLA-A*26:01 | surface glycoprotein | 258  | 266  | 9  | WTAGAAAYY   | Consensus (ann/smm) | 0.11 |
| 2597 | HLA-A*33:03 | surface glycoprotein | 975  | 983  | 9  | SVLNDILSR   | netmhcpa_el         | 0.11 |
| 2598 | HLA-A*02:06 | surface glycoprotein | 2    | 11   | 10 | FVFLVLLPLV  | Consensus (ann/smm) | 0.1  |
| 2599 | HLA-A*03:01 | surface glycoprotein | 454  | 462  | 9  | RLFRKSNLK   | Consensus (ann/smm) | 0.1  |
| 2600 | HLA-A*33:03 | surface glycoprotein | 1099 | 1107 | 9  | GTHWFVTQR   | netmhcpa_el         | 0.1  |
| 2601 | HLA-A*33:03 | surface glycoprotein | 394  | 403  | 10 | NVYADSFVIR  | netmhcpa_el         | 0.09 |
| 2602 | HLA-A*33:03 | surface glycoprotein | 677  | 685  | 9  | QTNSPRRAR   | netmhcpa_el         | 0.08 |
| 2603 | HLA-A*33:03 | surface glycoprotein | 36   | 44   | 9  | VYYPDKVFR   | netmhcpa_el         | 0.06 |
| 2604 | HLA-A*33:03 | surface glycoprotein | 349  | 357  | 9  | SVYAWNRKR   | netmhcpa_el         | 0.02 |
