# Supplementary material
Source: PubMed Central journal article supplement (PMC7836868)
Supplement: mmc2.pdf [file mmc2.pdf]

**Supplementary Table 2: Presence of promiscuous CTL epitopes of SARS-CoV-2 in other strains**

| <b>Peptide No.</b> | <b>Peptide Sequence</b> | <b>Letter code of Aminoacids</b> | <b>Presence of epitopes in other 10 SARS-Co-V-2 Strains</b> |
|--------------------|-------------------------|----------------------------------|-------------------------------------------------------------|
| 1                  | FLAFVVFLL               | FLAFV                            | 10                                                          |
| 2                  | FVVFLLVTL               | FVVF                             | 10                                                          |
| 3                  | SVLLFLAFV               | SVLL                             | 10                                                          |
| 4                  | FVLAAYRI                | FVLA                             | 10                                                          |
| 5                  | SFRLFARTR               | SFRL                             | 10                                                          |
| 6                  | FLFLTWICL               | FLFL                             | 10                                                          |
| 7                  | LWPVTLACF               | LWPV                             | 10                                                          |
| 8                  | SYFIASFRL               | SYFI                             | 10                                                          |
| 9                  | LSPRWYFYY               | LSPR                             | 10                                                          |
| 10                 | FLARGIVFM               | FLAR                             | 10                                                          |
| 11                 | LAYYFMRFR               | LAYY                             | 10                                                          |
| 12                 | LSYGIATVR               | LSYG                             | 10                                                          |
| 13                 | TQWSLFFFL               | TQWS                             | 7                                                           |
| 14                 | VMVELVAEL               | VMVE                             | 10                                                          |
| 15                 | WLMWLIINL               | WLMW                             | 10                                                          |
| 16                 | EFTPFDVVR               | EFTP                             | 10                                                          |
| 17                 | EIAIILASF               | EIAI                             | 10                                                          |
| 18                 | FAIGLALYY               | FAIG                             | 10                                                          |
| 19                 | FLAYILFTR               | FLAY                             | 10                                                          |
| 20                 | FVVEVVDKY               | FVVE                             | 10                                                          |
| 21                 | HLYLQYIRK               | HLYL                             | 10                                                          |
| 22                 | HSIGFDYVY               | HSIG                             | 0                                                           |
| 23                 | ILHCANFNV               | ILHC                             | 10                                                          |
| 24                 | IYLYLTFYL               | IYLY                             | 10                                                          |
| 25                 | KLNVGDYFV               | KLNV                             | 10                                                          |
| 26                 | KSAGFPFNK               | KSAG                             | 10                                                          |
| 27                 | LQLGFSTGV               | LQLG                             | 10                                                          |
| 28                 | LYENAFLPF               | LYEN                             | 7                                                           |
| 29                 | MFLARGIVF               | MFLA                             | 10                                                          |
| 30                 | NLSDRVVFV               | NLSD                             | 10                                                          |
| 31                 | NTVIWDYKR               | NTVI                             | 10                                                          |
| 32                 | RLIIRENNR               | RLII                             | 10                                                          |
| 33                 | RNYVFTGYR               | RNYV                             | 10                                                          |
| 34                 | RQLLFVVEV               | RQLL                             | 10                                                          |
| 35                 | SQLGGLHLL               | SQLG                             | 10                                                          |
| 36                 | STQWSLFFF               | STQW                             | 10                                                          |
| 37                 | SVIYLYLTF               | SVIY                             | 10                                                          |
| 38                 | VIYLYLTFY               | VIYL                             | 10                                                          |
| 39                 | FLQSINFVR               | FLQS                             | 10                                                          |

|    |           |       |    |
|----|-----------|-------|----|
| 40 | WLIVGVALL | WLIV  | 10 |
| 41 | FQVTIAEIL | FQVT  | 10 |
| 42 | ILFLALITL | ILFL  | 10 |
| 43 | FLAFLFLV  | FLAFL | 0  |
| 44 | LIDFYLCFL | LIDF  | 0  |
| 45 | YIDIGNYTV | YIDI  | 10 |
| 46 | KWYIRVGAR | KWYI  | 10 |
| 47 | WTAGAAAYY | WTAG  | 10 |
| 48 | FTISVTTEI | FTIS  | 10 |
| 49 | PYRVVLSF  | PYRV  | 10 |
| 50 | VVFLHVTVV | VVFL  | 10 |
